1 **Examining molecular determinants underlying heterogeneity of synaptic release**  
2 **probability using optical quantal imaging**

3

4 Yulia Akbergenova<sup>1,2,3</sup>, Yao V. Zhang<sup>1,2,3</sup>, Shirley Weiss-Sharabi<sup>1,2,3</sup>, Cunningham, Karen L.<sup>1,2</sup>,  
5 J. Troy Littleton<sup>1,2,3</sup>

6

7 <sup>1</sup>The Picower Institute for Learning and Memory, Massachusetts Institute of Technology,  
8 Cambridge, United States; <sup>2</sup>Department of Biology, Massachusetts Institute of Technology,  
9 Cambridge, United States; <sup>3</sup> Department of Brain and Cognitive Sciences, Massachusetts Institute  
10 of Technology, Cambridge, United States;

11

12

13 Correspondence and requests for materials should be addressed to Y.A. ([yulakb@mit.edu](mailto:yulakb@mit.edu)) or  
14 J.T.L. ([troy@mit.edu](mailto:troy@mit.edu)).

15

16

17 The authors declare no competing interests.

18

19

20

21 **Abstract**

22

23 Neurons communicate through neurotransmitter release at specialized synaptic regions known as  
24 active zones (AZs). Using transgenic biosensors to image postsynaptic glutamate receptor  
25 activation following single vesicle fusion events at *Drosophila* neuromuscular junctions, we  
26 analyzed release probability ( $P_r$ ) maps for a defined connection with ~300 AZs between synaptic  
27 partners. Although  $P_r$  was very heterogeneous, it represented a stable and unique feature of each  
28 AZ.  $P_r$  heterogeneity was not abolished in mutants lacking Synaptotagmin 1, suggesting the AZ  
29 itself is likely to harbor a key determinant(s). Indeed, AZ  $P_r$  was strongly correlated with  
30 presynaptic  $\text{Ca}^{2+}$  channel density and  $\text{Ca}^{2+}$  influx at single release sites. In addition,  $P_r$  variability  
31 was reflected in the postsynaptic compartment, as high  $P_r$  AZs displayed a distinct pattern of  
32 glutamate receptor clustering. Developmental analysis suggests that high  $P_r$  sites emerge from  
33 earlier formed AZs, with a temporal maturation in transmission strength occurring over several  
34 days.

35

36

37

## 38 **Introduction**

39       Synaptic vesicle fusion occurs at specialized regions of the presynaptic membrane known  
40 as active zones (AZs). Several evolutionarily conserved structural proteins are enriched in this  
41 subdomain of the presynaptic terminal, including RIM, RIM binding protein, Syd-1, Liprin- $\alpha$ ,  
42 ELKS/CAST/Bruchpilot, Munc13, and Bassoon/Piccolo/Fife (Schoch and Gundelfinger, 2006;  
43 Südhof, 2012; Van Vactor and Sigrist, 2017; Zhai and Bellen, 2004). These large  
44 macromolecular complexes facilitate clustering of synaptic vesicles and voltage-gated  $\text{Ca}^{2+}$   
45 channels (VGCCs). The clustering of VGCCs at AZs allow action potential-triggered  $\text{Ca}^{2+}$  influx  
46 to act locally on synaptic vesicles that are docked and primed for release (Acuna et al., 2016;  
47 Bucurenciu et al., 2008; Eggermann et al., 2011; Fouquet et al., 2009; Kawasaki et al., 2004).  
48 Synaptic vesicle fusion is tightly regulated and occurs through a highly probabilistic process,  
49 often with only a small percent of action potentials triggering release from individual AZs  
50 (Körber and Künér, 2016). Although AZs are thought to share the same overall complement of  
51 proteins, release probability ( $P_r$ ) for synaptic vesicle fusion is highly variable across different  
52 neurons, and even across AZs formed by the same neuron (Atwood and Karunanithi, 2002;  
53 Branco and Staras, 2009; Melom et al., 2013; Peled and Isacoff, 2011). Indeed, some AZ-  
54 specific proteins are non-uniformly distributed, and the molecular composition of AZs can  
55 undergo rapid changes (Glebov et al., 2017; Graf et al., 2009; Liu et al., 2016; Reddy-Alla et al.,  
56 2017; Sugie et al., 2015; Tang et al., 2016; Weyhersmüller et al., 2011; Wojtowicz et al., 1994).

57       The *Drosophila* neuromuscular junction (NMJ) has emerged as a useful system to study  
58 release heterogeneity. At this connection, motor neurons form glutamatergic synapses onto  
59 bodywall muscles in a stereotypical fashion, with the axon expanding to form ~10-60 synaptic

60 boutons that each contain many individual AZs (Harris and Littleton, 2015). *Drosophila* AZs are  
61 termed T-bars due to their mushroom-like appearance by EM, and contain a similar assortment  
62 of proteins to those identified at mammalian AZs (Böhme et al., 2016; Bruckner et al., 2017,  
63 2012; Ehmann et al., 2014; Feeney et al., 1998; Fouquet et al., 2009; Graf et al., 2012; Jan and  
64 Jan, 1976; Kaufmann et al., 2002; Kittel et al., 2006; Liu et al., 2011; Oswald et al., 2010; Wagh  
65 et al., 2006). Each AZ is specifically associated with a postsynaptic glutamate receptor field,  
66 usually separated from other PSDs by membrane infoldings that form the subsynaptic reticulum  
67 (SSR) (Johansen et al., 1989). Glutamate receptors at the *Drosophila* NMJ are excitatory  
68 inotropic non-NMDA receptors that exist as tetramers, with three obligatory subunits encoded by  
69 GluRIII, GluRIID and GluRIIE, and a variable 4<sup>th</sup> subunit encoded by either GluRIIA (A-type)  
70 or GluRIIB (B-type) (Featherstone et al., 2005; Marrus et al., 2004; Petersen et al., 1997; Qin et  
71 al., 2005; Schuster et al., 1991). GluRIIA containing receptors generate a larger quantal size and  
72 display slower receptor desensitization than their GluRIIB counterparts (DiAntonio et al., 1999).  
73 The A- and B-subtypes compete for incorporation into the tetramer at individual postsynaptic  
74 densities (PSDs) in a developmental and activity-regulated fashion (Chen and Featherstone,  
75 2005; DiAntonio et al., 1999; Marrus and DiAntonio, 2004; Rasse et al., 2005; Schmid et al.,  
76 2008).

77 The stereotypical alignment of individual AZs to distinct postsynaptic glutamate receptor  
78 fields in *Drosophila* allowed the generation of genetic tools to optically follow quantal fusion  
79 events at single release sites by visualizing glutamate receptor activation (Melom et al., 2013;  
80 Peled and Isacoff, 2011). Classically, studies of synaptic transmission have used  
81 electrophysiology to measure the postsynaptic effect of neurotransmitter release over a  
82 population of release sites (Katz and Miledi, 1969, 1967), precluding an analysis of how



83 individual AZs respond. By transgenically expressing GCaMP  $\text{Ca}^{2+}$  sensors that target to the  
84 postsynaptic membrane through PDZ binding or myristoylation domains, single vesicle fusion  
85 events at each individual AZ can be imaged by following the spatially localized  $\text{Ca}^{2+}$  influx  
86 induced upon glutamate receptor opening. This allows for the generation of  $P_r$  maps for both  
87 evoked and spontaneous fusion for all AZs formed onto the muscle by the innervating motor  
88 neuron (Cho et al., 2015; Melom et al., 2013; Muhammad et al., 2015; Newman et al., 2017;  
89 Peled et al., 2014; Peled and Isacoff, 2011; Reddy-Alla et al., 2017). One surprising finding  
90 using this quantal imaging approach is that the hundred of AZs formed by a single motor neuron  
91 have a heterogeneous distribution of  $P_r$ , ranging from 0.01 to  $\sim 0.5$ , with neighboring AZs often  
92 showing greater than 40-fold differences in  $P_r$  (Melom et al., 2013; Peled et al., 2014).

93 Key questions raised by these observations include how  $P_r$  is uniquely set for individual  
94 AZs, and whether rapid changes in  $P_r$  mediate distinct forms of synaptic plasticity. One potential  
95 mechanism to explain  $P_r$  variability is that presynaptic AZs show distinct  $\text{Ca}^{2+}$  channel density  
96 and subsequent  $\text{Ca}^{2+}$  influx at single release sites. An alternative model is that  $\text{Ca}^{2+}$  entry is  
97 similar over all AZs, and that evoked  $P_r$  is correlated with local cytosolic or synaptic vesicle  
98 proteins and their number and/or state (i.e. phosphorylation status). Likewise, another AZ  
99 determinant beyond  $\text{Ca}^{2+}$  channels could be differentially distributed that controls synaptic  
100 vesicle docking or priming state. Each of these possibilities could contribute to AZ  $P_r$ ,  
101 collectively, or one mechanism might dominate. To gain insight into the molecular mechanisms  
102 that control the heterogeneous distribution of  $P_r$  at AZs, we employed optical quantal imaging at  
103 *Drosophila* NMJs to identify high  $P_r$  sites and examine their properties. Our findings indicate  
104 that AZs show differential accumulation of  $\text{Ca}^{2+}$  channels that generate distinct levels of  
105 presynaptic  $\text{Ca}^{2+}$  influx and variable  $P_r$ , with AZ maturation playing a key role in setting  $P_r$ .

106 **Results**

107 ***Drosophila* NMJ synapses display heterogeneity in  $P_r$ , ranging from functionally silent sites**  
108 **to high  $P_r$  AZs**

109         Recent studies have demonstrated that release sites possess unique structural and  
110 functional heterogeneity (Éltes et al., 2017; Holderith et al., 2012; Maschi and Klyachko, 2017;  
111 Melom et al., 2013; Peled et al., 2014; Reddy-Alla et al., 2017; Sugie et al., 2015). Using the  
112 *Drosophila* NMJ, we explored the source of variation in  $P_r$  at this synaptic connection. We  
113 previously observed that evoked  $P_r$  is non-uniform across a population of ~300 AZs formed by  
114 motor neuron MN4-Ib onto muscle 4, ranging from 0.01 to ~0.5 in HL3 saline containing 1.3  
115 mM extracellular  $\text{Ca}^{2+}$  and 20 mM  $\text{Mg}^{2+}$  (Melom et al., 2013). In our original study, each AZ  
116 was defined by ROIs where postsynaptic  $\text{Ca}^{2+}$  flashes were observed during stimulation, but AZs  
117 were not co-labeled in the live preparation. To more closely examine AZ  $P_r$  heterogeneity, we  
118 identified the position of each corresponding PSD by co-expressing the RFP-tagged glutamate  
119 receptor subunit GluRIIA (Rasse et al., 2005). We also created a newer edition of our previous  
120 biosensor by generating UAS transgenic animals expressing the  $\text{Ca}^{2+}$  sensitive GCaMP6s fused  
121 with an N-terminal myristoylation (myr) domain. We targeted UAS-myrGCaMP6s to the  
122 postsynaptic muscle membrane using Mef2-GAL4 and monitored  $\text{Ca}^{2+}$  influx after activation of  
123 postsynaptic glutamate receptors from spontaneous neurotransmitter release or nerve stimulation  
124 (0.3 Hz for 5 minutes) in muscle 4 of early stage 3<sup>rd</sup> instar larvae (Movie 1). In response to  
125 stimulation, synchronous vesicle fusion could be identified across distinct populations of release  
126 sites (Figure 1A). During multiple rounds of stimulation, fusion events corresponding to release  
127 from different subsets of AZs were observed. However, a small subset of AZs (~10%)

128 experienced far more frequent fusion events than average, with GCaMP6s activation at the same  
129 PSD repeatedly observed during low frequency stimulation (Figure 1A, arrow).

130 Using this approach, we mapped all myrGCaMP6s visualized release events to the actual  
131 position of *in vivo* labeled glutamate receptor PSDs marked by GluRIIA-RFP. Consistent with  
132 our previous data, we observed a heterogeneous distribution of AZ  $P_r$ , with an average  $P_r$  of  
133  $0.073 \pm 0.004$  ( $n = 1933$  AZs from 16 NMJs from 16 animals). However, there was a >50-fold  
134 difference in  $P_r$  between the highest and lowest releasing sites. We plotted the distribution of AZ  
135  $P_r$  and observed a skew in the data, with a small number of AZs consistently showing high  
136 release rates (75% percentile of  $P_r$  was 0.1, with a maximum  $P_r$  of 0.73, Figure 1B). Indeed, the  
137 release probability data did not fit a normal distribution (D'Agostino  $K^2$  test ( $p < 0.0001$ ), Shapiro-  
138 Wilk test ( $p < 0.0001$ ), Kolmogorov-Smirnov test ( $p < 0.0001$ )). Beyond the heterogeneous  $P_r$   
139 distribution, 9.7% of all release sites with apposed GluRIIA receptors displayed only  
140 spontaneous fusion events, and another 14.6% of the AZ population was silent for both  
141 spontaneous and evoked release during the recording period (Figure 1B). In addition, the  
142 majority of AZs rarely released a synaptic vesicle following an action potential, with a  $P_r$  in the  
143 range of 0.01 to 0.2. To functionally examine differences between high and low releasing sites,  
144 we categorized all AZs with a release rate greater than 2 standard deviations above average as  
145 “high  $P_r$ ”, and the remaining AZs that showed evoked release as “low  $P_r$ ”. Using these criteria,  
146 65.8% of all AZs fell in the low  $P_r$  category with an average release probability of  $0.049 \pm 0.004$ .  
147 9.9% of AZs were classified as high  $P_r$  sites, with an average release probability of  $0.277 \pm 0.015$   
148 (Figure 1C), indicating high  $P_r$  AZs displayed on average a 5.7-fold increased chance of vesicle  
149 fusion following an action potential compared to low  $P_r$  AZs.

150

151 **High  $P_r$  AZs correspond to single release sites with enhanced levels of the AZ protein**  
152 **Bruchpilot**

153 One potential caveat to the interpretation of heterogeneous distributions in  $P_r$  is the  
154 possibility that multiple release sites positioned in proximity to each other contribute to a false  
155 identification of high  $P_r$  sites. To determine if high  $P_r$  sites were due to release from multiple  
156 neighboring AZs, we employed high-resolution structured illumination microscopy (SIM)  
157 (Figure 1D) and combined it with the quantal imaging method. Presynaptic AZ position can be  
158 precisely identified at the NMJ by labeling the core T-bar component Bruchpilot (BRP), the  
159 homolog of mammalian ELKS/CAST (Fouquet et al., 2009; Wagh et al., 2006). Using dual color  
160 imaging (myrGCaMP6s and GluRIIA-RFP), we first mapped  $P_r$  across all AZs, and then fixed  
161 the tissue and labeled with anti-BRP antisera. SIM microscopy provides a lateral resolution of  
162 labeled biological structures with a limit of  $\sim 110$  nm (Wegel et al., 2016), allowing separation of  
163 individual AZs where the average BRP ring diameter is  $\sim 200$  nm (Owald et al., 2012). The  
164 presence of GluRIIA-RFP allowed precise mapping of release sites between live and fixed tissue,  
165 as well as correlation of high  $P_r$  sites with SIM labeled BRP-positive AZs (Figure 1D). Using an  
166 automated detection algorithm in the Volocity 3D image analysis software, we were able to  
167 identify all AZs labeled with BRP (Figure 1D, right panel), and to resolve individual AZ clusters  
168 that were not separated using conventional spinning disk microscopy where  $P_r$  was determined.  
169 The theoretical lateral resolution of the spinning disk confocal microscope for RFP labeled  
170 structures is  $\sim 280$  nm. Analysis of distances between different AZs by SIM indicated that  $2.45 \pm$   
171  $0.4\%$  ( $n = 9$  NMJs from 9 animals) of all AZs were located close enough to each other (within  
172  $280$  nm) such that they would not be resolvable in our live imaging. In contrast,  $9.9\%$  ( $n = 16$   
173 NMJs from 16 animals) of AZs were functionally classified as high  $P_r$  sites. Therefore, the

174 majority of high releasing sites are not likely to be explained by release events occurring from  
175 closely linked AZs.

176 To further analyze single versus closely spaced AZs, release maps were generated where  
177  $P_r$  was color-coded to visualize the range of probabilities for all release sites.  $P_r$  maps were then  
178 compared to BRP-positive AZs identified by SIM. As shown in Figure 1D, the vast majority of  
179 high  $P_r$  sites were represented by a single BRP-positive AZ that was not further resolvable after  
180 SIM imaging (Figure 1D, red circles). These single BRP clusters at high  $P_r$  sites were larger and  
181 brighter than most other BRP positive puncta (Figure 1E). The average total fluorescence of  
182 single BRP puncta from high  $P_r$  AZs ( $3.95 \times 10^6 \pm 2.67 \times 10^5$ ,  $n = 24$  AZs from 9 NMJs from 9  
183 animals) was 1.7-fold greater than the fluorescence of randomly selected low  $P_r$  BRP clusters  
184 ( $2.33 \times 10^6 \pm 0.98 \times 10^5$ ,  $n = 60$  AZs from 9 NMJs from 9 animals,  $p < 0.0001$ ). To further  
185 examine these large single BRP clusters and their release properties, larger clusters that could not  
186 be resolved using conventional spinning disk microscopy were separately analyzed. All BRP  
187 clusters larger than 280 nm were automatically detected and assigned their release probability  
188 parameters measured during live imaging. We then determined whether these sites were  
189 represented by single or multiple AZs using SIM microscopy. Clusters  $> 280$  nm in diameter that  
190 could be resolved to multiple BRP positive AZs after SIM imaging had a lower  $P_r$  ( $0.10 \pm 0.02$ ,  $n$   
191  $= 35$  AZs from 5 NMJs from 5 animals) than those comprised of a single large BRP positive AZ  
192 ( $0.19 \pm 0.02$ ,  $n = 42$  AZs from 5 NMJs from 5 animals, Figure 1F). As such, high resolution SIM  
193 microscopy confirms that most high  $P_r$  sites correspond to single AZs with more intense BRP  
194 labeling, consistent with previous data regarding the positive role of BRP in regulating  $P_r$  (Peled  
195 et al., 2014; Reddy-Alla et al., 2017).

196

## 197 **Individual AZ $P_r$ is stable across imaging sessions**

198 We next examined if the non-uniform distribution of  $P_r$  across AZs was stable when no  
199 plasticity changes were induced. If  $P_r$  was highly dynamic at individual AZs over time, unique  
200 local synaptic vesicle pools might be an important contributor to the distribution of variable  
201 release properties. However, a more stable  $P_r$  would argue for a specific factor(s) resident at  
202 individual AZs. We were limited in our ability to examine  $P_r$  continuously over time intervals  
203 greater than 10-15 minutes due to bleaching of GCaMP6s from the high frequency capture rate.  
204 Within this constraint, we conducted a 3-minute imaging session using 0.3 Hz stimulation to  
205 generate an initial  $P_r$  map, and then allowed the preparation to rest for 5 minutes without  
206 stimulation or imaging.  $P_r$  was then re-mapped in a final 3-minute imaging session using 0.3 Hz  
207 stimulation. The activity level of individual AZs was very stable between the two sessions  
208 (Figure 2A). This was especially evident for high  $P_r$  sites, which sustained high levels of activity  
209 during both imaging sessions. Plotting the release rate for all AZs revealed a strong correlation  
210 for  $P_r$  across the two imaging sessions (Pearson  $r = 0.77$ ,  $R^2=0.59$ ,  $p<0.0001$ ,  $n = 988$  AZs from  
211 8 NMJs from 7 animals, Figure 2B). These data suggest that release rate is a unique property of  
212 each AZ and is stable over this time interval.

213 Heterogeneous release rates between AZs might be sensitive to the accumulation of  
214 different vesicle populations with variable levels of fusogenicity. If so, a stronger stimulation  
215 paradigm that is sufficient to drive vesicle cycling and intermixing would be expected to alter the  
216  $P_r$  map. To test this, NMJ preparations were imaged during two low frequency 0.3 Hz  
217 stimulation periods separated by a 5-minute 5 Hz stimulation session to induce robust synaptic  
218 vesicle turnover and recycling (Figure 2C). Release maps were not dramatically altered by 5 Hz  
219 stimulation, with the overall correlation of  $P_r$  similar to maps generated without stimulation

220 (Pearson  $r = 0.78$ ,  $R^2 = 0.61$ ,  $p < 0.0001$ ,  $n = 613$  AZs from 6 NMJs from 6 animals, Figure 2D).  
221 Thus, inducing vesicle recycling with 5 Hz stimulation does not dramatically change  $P_r$  across  
222 the AZ population, arguing that structural AZ components, versus specific vesicle populations  
223 surrounding AZs, are likely to represent the major driver of  $P_r$  heterogeneity at this synapse.

224

### 225 ***Synaptotagmin* null mutants display release heterogeneity across AZs**

226 The synchronous  $\text{Ca}^{2+}$  sensor Synaptotagmin 1 (Syt1) resides on synaptic vesicles and  
227 plays a major role in  $P_r$  determination at *Drosophila* NMJs (DiAntonio and Schwarz, 1994;  
228 Guan et al., 2017; Lee et al., 2013; Littleton et al., 1994, 1993; Yoshihara et al., 2003; Yoshihara  
229 and Littleton, 2002). We hypothesized that if synaptic vesicle proteins play a key role in  $P_r$ ,  
230 heterogeneity, in addition to their established role in determining overall  $P_r$ , then elimination of  
231 Syt1 would likely disrupt this heterogeneity. We therefore expressed myrGCaMP6s with Mef2-  
232 GAL4 in *syt1* null mutants. As observed electrophysiologically, quantal imaging in *syt1* null  
233 mutants revealed a dramatic reduction in evoked release, a shift from synchronous to highly  
234 asynchronous fusion, and an increase in spontaneous release rates (Movie 2). To estimate AZ  
235 heterogeneity in *syt1* nulls, preparations were stimulated at 5 Hz and release events were  
236 normalized to the number of stimuli (Figure 3A). The average release rate per AZ per second in  
237 *syt1* nulls during 5 Hz stimulation was  $0.03 \pm 0.001$  ( $n = 719$  AZs from 7 NMJs from 6 animals,  
238 Figure 3B). In contrast, spontaneous release rate per AZ in the absence of stimulation was  $0.018$   
239  $\pm 0.001$  per second in *syt1* nulls ( $n = 719$  AZs from 7 NMJs from 6 animals) compared to  $0.011$   
240  $\pm 0.001$  in controls ( $n = 559$  AZs from 6 NMJs from 4 animals,  $p < 0.0001$ , Figure 3B). All  
241 visualized release events were mapped to specific AZs and representative  $P_r$  heatmaps were

242 generated (Figure 3A). Although release rate is dramatically reduced in *syt1* nulls, AZs still  
243 maintain the overall heterogeneity in  $P_r$  distribution across AZs (Figure 3C-E). Comparing the  
244 distribution of AZ release rates for *syt1* nulls and controls, release was proportionally decreased  
245 across all AZs in *syt1* (Figure 3C). Frequency distribution analysis of AZs with normalized  
246 release rates (from 0 to maximum release) confirmed that there was no significant change in the  
247 heterogeneity of release between *syt1* mutants and controls (Figure 3D). Likewise, the  
248 cumulative frequency distribution of normalized AZ  $P_r$  was similar between *syt1* mutants and  
249 controls (Figure 3E). Given that AZ release remains highly heterogeneous in the absence of Syt1,  
250 these data suggest that variable distribution of key AZ components, rather than heterogeneity of  
251 local synaptic vesicle proteins, is likely to control  $P_r$  distribution across *Drosophila* NMJ AZs.

252

### 253 **$P_r$ is highly correlated with $\text{Ca}^{2+}$ channel abundance at AZs**

254 We next investigated what key AZ protein(s) might control  $P_r$ . Many structural  
255 components of AZs cooperate to regulate positioning of synaptic vesicles in the vicinity of  $\text{Ca}^{2+}$   
256 channels. Indeed, synaptic vesicle fusion is highly sensitive to  $\text{Ca}^{2+}$  and most effective in close  
257 proximity to  $\text{Ca}^{2+}$  channels (Augustine et al., 1985; Böhme et al., 2016; Chen et al., 2015;  
258 Heidelberger et al., 1994; Katz and Miledi, 1967; Katz, 1969; Keller et al., 2015; Meinrenken et  
259 al., 2003, 2002; Stanley, 2016; Wang et al., 2008). As such,  $\text{Ca}^{2+}$  channel abundance and the  
260 subsequent level of  $\text{Ca}^{2+}$  influx at individual AZs is a compelling variable for  $P_r$  heterogeneity.  
261 In *Drosophila*, *Cacophony* (*cac*) encodes the voltage-activated  $\text{Ca}^{2+}$  channel  $\alpha 1$  subunit required  
262 for neurotransmitter release (Fouquet et al., 2009; Kawasaki et al., 2004, 2000; Littleton and  
263 Ganetzky, 2000; Liu et al., 2011; Rieckhof et al., 2003; Smith et al., 1996). Transgenic animals



264 expressing fluorescently tagged Cac channels have been previously generated, demonstrating  
265 that Cac localizes specifically to AZs at the NMJ (Kawasaki et al., 2004; Matkovic et al., 2013;  
266 Yu et al., 2011). To examine the effect of differential Cac distribution on AZ release, dual color  
267 imaging experiments were performed where vesicle fusion events were detected by  
268 myrGCaMP6s and  $Ca^{2+}$  channel distribution was visualized by expression of red-labeled Cac-  
269 TdTomato. Preparations were stimulated at 0.3 Hz for 5 minutes and AZ release rate was  
270 compared with Cac-TdTomato fluorescence distribution (Figure 4A, B). A strong positive  
271 correlation (Pearson  $r = 0.62$ ,  $R^2 = 0.38$ ,  $p < 0.0001$ ,  $n = 483$  AZs from 7 NMJs from 7 animals)  
272 was observed between Cac fluorescence intensity and evoked AZ  $P_r$  (representative experiment  
273 shown in Figure 4B). We next examined if there was a similar correlation between Cac levels  
274 and the frequency of spontaneous vesicle release (minis) at individual AZs. AZ release rates for  
275 spontaneous events showed only a mild correlation (Pearson  $r = 0.19$ ,  $R^2 = 0.04$ ,  $p < 0.0001$ ,  $n =$   
276 483 AZs from 7 NMJs from 7 animals) between mini frequency and Cac density (representative  
277 experiment shown in Figure 4C). These results match well with previous observations that  
278 release rates for evoked and spontaneous fusion are poorly correlated at *Drosophila* AZs (Melom  
279 et al., 2013; Peled et al., 2014), and that spontaneous fusion is largely independent of  
280 extracellular  $Ca^{2+}$  at this synapse (Jorquera et al., 2012; Lee et al., 2013).

281 To gain confidence that the observed Cac-TdTomato intensity accurately reflects Cac  
282 channel distribution, Cac channels transgenically tagged with GFP were also examined.  
283 Postsynaptic expression of myrGCaMP6s obscured Cac-GFP fluorescence, preventing quantal  
284 imaging with this sensor in the Cac-GFP background. Therefore, transgenic lines expressing  
285 myristoylated red  $Ca^{2+}$  indicators previously characterized in the field were generated, including  
286 RCaMP1h, R-GECO1 and jRGECO1a. Although RCaMP1h and R-GECO1 were too dim to

287 visualize localized  $\text{Ca}^{2+}$  transients at AZs, transgenic lines expressing the myristoylated  $\text{Ca}^{2+}$   
288 indicator jRGECO1a (Dana et al., 2016) in muscle 4 allowed detection of  $\text{Ca}^{2+}$  influx events  
289 following vesicle fusion at single AZs (Movie 3). In contrast to the more robust GCaMP6s,  
290 jRGECO1a has a shorter fluorescent lifetime and the signal amplitude decays more rapidly over  
291 time. Indeed, quantal events imaged in transgenic animals expressing myr-jRGECO1a were  
292 dimmer and fully bleached within 7-10 minutes of imaging. Therefore, preparations were  
293 stimulated at 1 Hz for shorter two minute imaging sessions to generate  $P_r$  maps in myr-  
294 jRGECO1a expressing larvae (Figure 4D). Using this approach, a strong correlation (Pearson  $r =$   
295  $0.54$ ,  $R^2 = 0.29$ ,  $p < 0.0001$ ,  $n = 651$  AZs from 7 NMJs from 7 animals) between AZ  $P_r$  detected  
296 by myr-jRGECO1a and Cac-GFP density was observed (representative experiment shown in  
297 Figure 4E). Again, a weaker correlation was found between rates of spontaneous events and Cac-  
298 GFP density (Pearson  $r = 0.17$ ,  $R^2 = 0.03$ ,  $p < 0.0001$ ,  $n = 651$  AZs from 6 NMJs from 6 animals).  
299 Hence,  $P_r$  for action-potential evoked fusion is strongly correlated with the local density of Cac  
300 channels at individual AZs, regardless of which fluorophore is used to visualize Cac.

301 To determine the relative levels of Cac that defined low and high  $P_r$  sites, the distribution  
302 of Cac-GFP and BRP across the AZ population was examined using SIM microscopy. Similar to  
303 the variable levels of BRP described earlier (Figure 1D), variability in the distribution and mean  
304 intensity of Cac-GFP fluorescence across AZs at muscle 4 was observed by SIM (Figure 4 –  
305 figure supplement 1A, B). 5.72% of AZs displayed Cac-GFP fluorescence greater than 2  
306 standard deviations above average ( $n = 2011$  AZs from 11 NMJs from 3 animals). The mean  
307 Cac-GFP fluorescence for these bright AZs ( $>2$  standard deviations above average) was 2.1-fold  
308 greater than that observed for the remaining sites ( $p < 0.0001$ , Figure 4 – figure supplement 1C).  
309 We next compared Cac-GFP fluorescence obtained for AZs that were functionally classified as

310 either low or high  $P_r$  sites by quantal imaging using myr-jRGECO1a (Figure 4F). The average  
311 fluorescence of single Cac-GFP puncta from high  $P_r$  AZs (normalized intensity =  $0.6 \pm 0.04$ , n =  
312 38 AZs from 7 NMJs from 7 animals) was 2.09-fold greater than the average fluorescence of low  
313  $P_r$  AZs (normalized intensity =  $0.29 \pm 0.01$ , n = 638 AZs from 7 NMJs from 7 animals,  
314  $p < 0.0001$ ). The  $P_r$  of AZs classified on the basis of the levels of their Cac-GFP fluorescence was  
315 also examined. The average  $P_r$  for AZs displaying high Cac-GFP fluorescence ( $>2$  standard  
316 deviations above average) was  $0.2 \pm 0.016$  (n = 7 NMJs from 7 animals) compared to  $0.06 \pm$   
317  $0.003$  (n = 7 NMJs from 7 animals,  $p < 0.0001$ ) for the remaining AZs with lower levels of Cac-  
318 GFP. Although the absolute number of Cac channels at single AZs is unknown, these data  
319 indicate a  $\sim 2$ -fold increase in  $\text{Ca}^{2+}$  channel number is likely sufficient to change a low  $P_r$  site into  
320 a high  $P_r$  AZ at the *Drosophila* NMJ. Given the steep 3<sup>rd</sup> to 4<sup>th</sup> order non-linear dependence of  
321 synaptic vesicle fusion with  $\text{Ca}^{2+}$  (Dodge and Rahamimoff, 1967; Heidelberger et al., 1994; Jan  
322 and Jan, 1976), a small change in channel number is likely to have a large effect on  $P_r$ .

323

#### 324 **$P_r$ correlates with the level of presynaptic $\text{Ca}^{2+}$ influx measured at individual AZs**

325 Although our data indicate that Cac channel density correlates with AZ  $P_r$ , a more  
326 important functional readout of  $\text{Ca}^{2+}$  channel activity is the local  $\text{Ca}^{2+}$  influx occurring at each  
327 AZ that drives synaptic vesicle fusion. It is unclear if transgenically tagged  $\text{Ca}^{2+}$  channel  
328 fluorescence intensity functionally reflects a heterogeneous level of  $\text{Ca}^{2+}$  influx at each AZ.  
329 Indeed,  $\text{Ca}^{2+}$  channels are a source of widespread modulation by second messenger pathways  
330 that can alter channel conductivity (Catterall and Few, 2008; Dolphin et al., 1991; Evans and  
331 Zamponi, 2006; Reid et al., 2003; Tedford and Zamponi, 2006; Zamponi and Snutch, 1998),

332 indicating the abundance of  $\text{Ca}^{2+}$  channels may not be the best proxy for AZ  $\text{Ca}^{2+}$  entry. In  
333 addition, a direct measure of  $\text{Ca}^{2+}$  influx would be useful to bypass any potential unknown  
334 effects on  $P_r$  generated by expressing fluorescently tagged Cac. To generate an estimate of the  
335  $\text{Ca}^{2+}$  influx that each AZ experiences independent of tagging Cac channels,  $\text{Ca}^{2+}$  influx was  
336 visualized by positioning GCaMP6m near  $\text{Ca}^{2+}$  channels at the AZ. Cac channels cluster in  
337 proximity to the AZ structural protein BRP (Fouquet et al., 2009). The C-terminal fragment of  
338 BRP is located further away from the AZ, where it spreads into a filamentous “umbrella” like  
339 structure. As such, GCaMP6m was added to the N-terminus of BRP, which localizes directly at  
340 the base of the AZ where  $\text{Ca}^{2+}$  channels cluster. Transgenic animals expressing N-terminal  
341 GCaMP6m fusions to a BRP fragment (BRP-short) corresponding to amino acids 473–1226 of  
342 the full 1740 amino acid protein (Schmid et al., 2008) were generated. BRP-short targets to AZs  
343 and co-localizes with native BRP (Fouquet et al., 2009; Schmid et al., 2008). Expression of  
344 GCaMP6m labeled BRP-short did not alter its localization, and GCaMP6m fluorescence could  
345 be detected presynaptically at individual AZs at 3<sup>rd</sup> instar larval NMJs (Figure 5A). At rest, N-  
346 terminal <sup>GCaMP</sup>BRP-short was dim, consistent with the low levels of resting  $\text{Ca}^{2+}$  inside terminals  
347 (Figure 5A). However, stimulation at 10 Hz resulted in a robust increase in discrete punctated  
348 fluorescence that remained confined to single AZs during stimulation (Figure 5A).

349 To assay the ability of the sensor to detect local  $\text{Ca}^{2+}$  influx, the stability of <sup>GCaMP</sup>BRP-  
350 visualized  $\text{Ca}^{2+}$  signals during multiple rounds of 5-second 10 Hz stimulation was determined.  
351 An image Z-stack was collected from individual boutons, and AZ fluorescence intensity was  
352 analyzed for each round of stimulation. Although the amount of fluorescence increase ( $\Delta F$ ) was  
353 different for each AZ, it was very stable at the same AZ for each independent stimulation (Figure  
354 5B). AZs that had lower levels of  $\text{Ca}^{2+}$  influx in the first round of stimulation had similarly low

355  $\Delta F$  across all three rounds (Figure 5B). Plotting the frequency distribution of all  $\Delta F$  signals  
356 confirmed that <sup>GCaMP</sup>BRP-short displayed a heterogeneous distribution of  $\Delta F$  across AZs during  
357 stimulation (n = 205 AZs from 6 NMJs from 3 animals, Figure 5C).

358 We next assayed if  $Ca^{2+}$  influx detected by <sup>GCaMP</sup>BRP-short is correlated with Cac  
359 channel density estimated by the fluorescence of Cac-TdTomato. Animals expressing both  
360 transgenes in the presynaptic compartment displayed a strong correlation (Pearson  $r = 0.73$ ,  $R^2 =$   
361  $0.53$ ,  $p < 0.0001$ , n = 176 AZs from 7 NMJs from 6 animals) between the  $Ca^{2+}$  dependent  
362 excitation of <sup>GCaMP</sup>BRP-short ( $\Delta F$ ) and Cac-TdTomato intensity at individual AZs during  
363 stimulation (Figure 5D, E). In contrast, a weaker correlation (Pearson  $r = 0.18$ ,  $R^2 = 0.03$ ,  
364  $p < 0.001$ , n = 338 AZs from 8 NMJs from 6 animals) of <sup>GCaMP</sup>BRP-short  $\Delta F$  and Cac intensity at  
365 rest was observed. These data indicate that the overall density of Cac channels detected by  
366 fluorescent tagging provides a reasonable estimation of the expected  $Ca^{2+}$  influx for each AZ.  
367 However, there were some instances where specific AZs experienced a disproportionately low  $\Delta F$   
368 of <sup>GCaMP</sup>BRP-short signal relative to their Cac-TdTomato intensity (Figure 5D, arrows). This  
369 observation suggests that  $Ca^{2+}$  influx can be fine-tuned and regulated independently of  $Ca^{2+}$   
370 channel abundance at certain AZs. As such, measuring both  $Ca^{2+}$  channel density and  $Ca^{2+}$  influx  
371 is likely to provide a more accurate readout of how  $P_r$  is controlled by local  $Ca^{2+}$  concentrations  
372 near the mouth of  $Ca^{2+}$  channel clusters.

373 Using <sup>GCaMP</sup>BRP-short as a tool to estimate  $Ca^{2+}$  influx at individual AZs, we analyzed  
374 the correlation between <sup>GCaMP</sup>BRP-short  $\Delta F$  induced by 10 Hz stimulation and release rate  
375 visualized by myr-jRGECO1a during 1 Hz stimulation at single release sites (Figure 6A, B). AZ  
376 heatmaps for both  $P_r$  and  $Ca^{2+}$  influx fluorescence intensity were generated and compared across  
377 the AZ population (Figure 6A). AZs that experienced stronger  $Ca^{2+}$  influx displayed the highest

378  $P_r$  during stimulation. Overall, there was a strong correlation between  $\text{Ca}^{2+}$  influx and AZ  $P_r$ ,  
379 (Pearson  $r = 0.56$ ,  $R^2 = 0.31$ ,  $p < 0.0001$ ,  $n = 492$  AZs from 6 NMJs from 6 animals, Figure 6B),  
380 indicating the levels of  $\text{Ca}^{2+}$  influx play a major role in determining whether a synaptic vesicle  
381 undergoes fusion during an evoked response. In contrast, the frequency of spontaneous vesicle  
382 fusion per AZ was only mildly correlated with the amount of  $\text{Ca}^{2+}$  influx detected by  $\text{GCaMP}^{\text{BRP}}$ -  
383 short (Pearson  $r = 0.23$ ,  $R^2 = 0.07$ ,  $n = 492$  AZs from 6 NMJs from 6 animals, representative  
384 experiment shown in Figure 6C), consistent with spontaneous release being largely independent  
385 of extracellular  $\text{Ca}^{2+}$  at this synapse. It is worth noting that although a strong correlation between  
386  $\text{Ca}^{2+}$  influx and evoked  $P_r$  was observed at most AZs, a minority population of AZs that  
387 displayed robust  $\text{Ca}^{2+}$  influx had very low  $P_r$  (Figure 6B). In summary, these data indicate that  
388  $\text{Ca}^{2+}$  channel density and  $\text{Ca}^{2+}$  influx are key factors regulating evoked release at individual AZs.  
389 In addition, other factors can negatively influence  $P_r$  at a small minority of AZs independent of  
390  $\text{Ca}^{2+}$  influx.

391

### 392 **Segregation of postsynaptic glutamate receptor subunits at high $P_r$ AZs**

393 We next examined if glutamate receptor composition in the postsynaptic compartment  
394 varied at low  $P_r$  versus high  $P_r$  AZs. At the *Drosophila* NMJ, glutamate receptors assemble as  
395 heteromeric tetramers containing three essential subunits (GluRIII, IID and IIE) and a variable  
396 4<sup>th</sup> subunit of GluRIIA or GluRIIB (Featherstone et al., 2005; Marrus et al., 2004; Petersen et al.,  
397 1997; Qin et al., 2005; Schuster et al., 1991). However, it is unclear if GluRIIA and GluRIIB  
398 differentially accumulate at AZs in a manner that correlates with presynaptic  $P_r$ . To visualize  
399 GluRIIA and GluRIIB, GluRIIA-RFP and GluRIIB-GFP tagged proteins were expressed under

400 the control of their endogenous promoters. To image myrGCaMP6s activity without obscuring  
401 GluRIIB-GFP, myrGCaMP6s was expressed at low levels using the LexA/LexOP system. We  
402 generated LexAop-myrGCaMP6s transgenic animals and expressed myrGCaMP6s in muscle 4  
403 with Mef2-LexA. LexA driven myrGCaMP6s signal is much dimmer than UAS-myrGCaMP6s.  
404 The fluorescent signal is observed at very low uniform levels in the muscle membrane in the  
405 absence of  $Ca^{2+}$  influx, and does not obscure the much brighter GluRIIB-GFP PSD puncta  
406 (Figure 7B, middle panel). However, upon  $Ca^{2+}$  binding to myrGCaMP6s, the fluorescence  
407 dramatically increases at AZs compared to the level of the endogenous GluRIIB-GFP signal,  
408 allowing simultaneous imaging of baseline GluRIIB-GFP levels and synaptic activity detected  
409 by myrGCaMP6s during stimulation.

410 Simultaneous expression of GluRIIA-RFP and GluRIIB-GFP revealed a heterogeneous  
411 distribution of each subunit across the AZ population, with GluRIIA levels far more variable  
412 than GluRIIB (Figure 7A). Indeed, similar to the relatively sparse localization of high  $P_r$  AZs  
413 across the NMJ (Figure 2), a similar sparse distribution of AZs apposed by very bright GluRIIA  
414 PSDs was observed (Figure 7A). To determine if AZs that preferentially accumulate high levels  
415 of GluRIIA correspond to high  $P_r$  release sites, we mapped  $P_r$  across the AZ population in  
416 GluRIIA-RFP/GluRIIB-GFP expressing animals. Analysis of the  $P_r$  map revealed a strong  
417 positive correlation between GluRIIA-RFP and  $P_r$  (Pearson  $r = 0.56$ ,  $R^2 = 0.32$ ,  $p < 0.0001$ ,  $n =$   
418 756 AZs from 8 NMJs from 4 animals, Figure 7B). In contrast, correlation with the levels of  
419 GluRIIB-GFP was weaker (Pearson  $r = 0.32$ ,  $R^2 = 0.1$ ,  $p < 0.0001$ ,  $n = 756$  AZs from 8 NMJs  
420 from 4 animals, Figure 7C). A correlation between brighter GluRIIA PSD puncta and higher  $P_r$   
421 sites was also observed in the analysis of *syt1* mutants (Figure 3A, arrows). These findings are  
422 consistent with previous observations that glutamate receptors preferentially cluster at AZs with



423 high  $P_r$  based on electrophysiological and morphological studies of a *Drosophila* GluRIII  
424 hypomorphic mutant (Marrus and Diantonio, 2004). We next examined how the resident AZ  
425 protein BRP differentially accumulated at AZs in the dual labeled glutamate receptor subunit  
426 lines. After mapping  $P_r$  in the larvae, preparations were fixed and stained with anti-BRP antisera.  
427 As previously observed in animals lacking tagged glutamate receptors (Figure 1), a positive  
428 correlation between AZ  $P_r$  and BRP levels was observed (Pearson  $r = 0.44$ ,  $R^2 = 0.2$ ,  $p < 0.0001$ ,  $n$   
429 = 399 AZs from 6 NMJs from 4 animals, Figure 7D). In summary, these data indicate that  
430 GluRIIA more strongly accumulates at PSDs apposing high  $P_r$  AZs.

431 Beyond the preferential GluRIIA accumulation at high  $P_r$  sites, we also observed a  
432 change in GluRIIA/GluRIIB distribution within single PSDs. The PSDs apposing the highest  $P_r$   
433 AZs showed a skewed distribution of the receptor subtypes, with GluRIIA concentrating in the  
434 center of the receptor field immediately apposing the presynaptic BRP cluster (Figure 7E,  
435 arrows). At these sites, GluRIIB occupied a more peripheral position around the central GluRIIA  
436 cluster. A similar localization pattern with a ring of GluRIIB surrounding a central GluRIIA  
437 patch was previously noted with antibody staining for the two receptors at some larval AZs in  
438 late 3<sup>rd</sup> larvae (Marrus et al., 2004). To analyze this segregation in glutamate receptor  
439 distribution at single PSDs in greater detail, GluRIIA/B staining was examined in the absence of  
440 co-expressed myrGCaMP6s to avoid any overlap in the GFP channel. Our prior analysis (Fig.  
441 7B) indicated the brightest GluRIIA PSDs correspond to high  $P_r$  sites. Bright PSDs were  
442 selected based on their GluRIIA intensity (2 standard deviations above average) and line profiles  
443 were drawn across each PSD defined by their corresponding presynaptic BRP puncta. The  
444 intensity of pixels along that line for each fluorophore was then analyzed. Average pixel  
445 intensity revealed drastically distinct profiles for GluRIIB distribution between “bright” and



446 “dim” PSDs classified based on their GluRIIA intensity. GluRIIB was more evenly distributed  
447 across the entire PSD at dim GluRIIA sites, but was segregated outward, forming a circular  
448 donut-like ring around central GluRIIA puncta at bright GluRIIA sites (Figure 7F). In addition,  
449 presynaptic BRP intensity was more strongly correlated with postsynaptic GluRIIA levels  
450 (Pearson  $r = 0.53$ ,  $R^2 = 0.28$ ,  $p < 0.0001$ ,  $n = 2496$  AZs from 19 NMJs from 7 animals, Figure 7G)  
451 compared to GluRIIB (Pearson  $r = 0.24$ ,  $R^2 = 0.05$ ,  $p < 0.0001$ ,  $n = 2496$  AZs from 19 NMJs from  
452 7 animals, Figure 7H). Overall, these findings indicate the postsynaptic cell accumulates  
453 GluRIIA and redistributes GluRIIB to the PSD periphery at high  $P_r$  sites.

454

455 **Analysis of  $P_r$  acquisition during AZ development using glutamate receptor segregation as**  
456 **a proxy**

457 The *Drosophila* larval NMJ is a highly dynamic structure, with new synaptic boutons and  
458 AZs undergoing continuous addition throughout development (Harris and Littleton, 2015; Rasse  
459 et al., 2005; Schuster et al., 1996; Zito et al., 1999). Given the correlation between  $Ca^{2+}$  channel  
460 density, GluRIIA/GluRIIB segregation and high  $P_r$ , we were interested in determining how AZs  
461 acquire a specific  $P_r$  during a larval developmental period that lasts 6-7 days. One model is that  
462 certain AZs gain a higher  $P_r$  status during development through a tagging or activity-dependent  
463 mechanism that would lead to preferential accumulation of key AZ components compared to  
464 their neighbors. Alternatively, high  $P_r$  AZs might simply be more mature than their low  $P_r$   
465 neighbors, having an earlier birthdate and a longer timeframe to accumulate AZ material. To  
466 differentiate between these models for release heterogeneity, it would be desirable to follow  $P_r$   
467 development from the embryonic through larval stages. However, this is not technically feasible

468 due to the small size of AZs and the rapid locomotion that larvae undergo, preventing generation  
469 of  $P_r$  maps in intact moving animals. Instead, we employed an alternative approach to repeatedly  
470 image the same NMJ at muscle 26 directly through the cuticle of intact larvae during anesthesia  
471 (Andlauer and Sigrist, 2012; Fouquet et al., 2009; Fuger et al., 2007; Rasse et al., 2005; Zhang et  
472 al., 2010). Using this technique, we found that anesthesia eliminated action potential induced  
473 release and the associated GCaMP signals, preventing direct  $P_r$  measurements in anesthetized  
474 larvae. We instead focused on imaging GluRIIA accumulation and GluRIIA/GluRIIB  
475 segregation, which was strongly correlated with  $P_r$  (Figure 7), as a proxy for the emergence of  
476 high  $P_r$  sites. Prior studies demonstrate GluRIIA at PSDs closely tracks with Cac accumulation  
477 at corresponding AZs (Fouquet et al., 2009; Rasse et al., 2005), indicating the two compartments  
478 are likely to mature at similar rates. To examine this directly, we assayed whether GluRIIA and  
479 Cac accumulation were correlated during development. Indeed, the intensity of Cac-GFP and  
480 GluRIIA-RFP puncta were strongly correlated at individual AZs during early larval development  
481 (Pearson  $r = 0.823$ ,  $R^2 = 0.6771$ ,  $p < 0.0001$ ,  $n = 441$  AZs from 8 NMJs from 8 larvae, Figure 7 –  
482 figure supplement 1A, B), indicating GluRIIA provides a robust marker that reflects the  
483 corresponding levels of presynaptic Cac at individual AZs.

484 Previously described *in vivo* imaging approaches with anesthesia at *Drosophila* NMJs  
485 employed early 3<sup>rd</sup> instar larvae as the starting time point, and followed the distribution of  
486 fluorescently-labeled synaptic proteins during the final ~36 hours of development prior to  
487 pupation (Rasse et al., 2005). To follow AZ  $P_r$  development soon after synapse formation, we  
488 modified these techniques to allow imaging of glutamate receptor distribution at earlier stages of  
489 development (see methods). This allowed successful birth dating and successive imaging of the  
490 same AZ over a 6-day period beginning shortly after synapse formation in the early 1<sup>st</sup> instar

491 period through the late 3<sup>rd</sup> instar stage (Figure 8, Figure 8 - figure supplement 1, Figure 8 –  
492 figure supplement 2). In early 1<sup>st</sup> instar larvae (within 12 hours of hatching) GluRIIA and  
493 GluRIIB were largely co-localized at postsynaptic puncta (Figure 8, Figure 8 - figure supplement  
494 1). One exception was the presence of diffuse GluRIIA that accumulated around unusually long  
495 axonal extensions that emerged from presynaptic boutons (Figure 8A, arrows). These structures  
496 were devoid of any detectable GluRIIB or the bright GluRIIA puncta that are associated with  
497 AZs, and may be remnants of previously described muscle filopodial structures, termed  
498 myopodia, that interact with presynaptic filopodia to dynamically regulate early synaptic target  
499 recognition (Kohsaka and Nose, 2009; Ritzenthaler et al., 2000; Ritzenthaler and Chiba, 2003).  
500 GluRIIA appears concentrated on these structures, as has been observed for the leucine-rich  
501 repeat cell adhesion protein Capricious (Kohsaka and Nose, 2009). Repeated imaging of these  
502 thinner GluRIIA-positive processes revealed that they were capable of developing into mature  
503 synaptic boutons with concentrated GluRIIA and GluRIIB synaptic puncta (Figure 8 – figure  
504 supplement 3). By 24 hours of larval growth, GluRIIA rich extensions were no longer observed,  
505 indicating these structures are restricted to early developmental stages.

506 Live imaging of GluRIIA and GluRIIB distribution at early PSDs in anesthetized 1<sup>st</sup>  
507 instar larvae demonstrated that the receptors were co-localized and lacked the segregation where  
508 GluRIIB clustered around central GluRIIA puncta that was observed at high  $P_r$  sites later in  
509 development (Figure 8B). The first emergence of GluRIIA/B segregation, with GluRIIB rings  
510 surrounding a GluRIIA core, was observed after 36 hours of imaging from the 1<sup>st</sup> instar period  
511 (Figure 8B, C). The GluRIIA/B segregation always emerged first at the oldest and most mature  
512 synapses that existed previously on the 1<sup>st</sup> day of imaging (Figure 8B, C). The most mature PSDs  
513 also contained more GluRIIA fluorescent signal ( $17430 \pm 634.0$ ,  $n = 86$  AZs from 8 NMJs from

514 5 animals) compared to later born synapses that emerged during the 48 hour imaging session  
515 ( $8909 \pm 289.8$ ,  $n = 210$  AZs from 8 NMJs from 5 animals). During later larval development, the  
516 cuticle thickness changed dramatically and prevented reliable comparison of absolute receptor  
517 density with earlier stages. However it was clear that GluRIIA intensities that were uniform in 1<sup>st</sup>  
518 instar larvae became more heterogeneous at the 3<sup>rd</sup> instar stage (Figure 8 – figure supplement 2).  
519 Indeed, histograms of normalized fluorescence intensity (relative intensity scaled from 0 to 1)  
520 revealed that GluRIIA and GluRIIB were distributed relatively uniformly at 1<sup>st</sup> instar larval  
521 PSDs, with GluRIIA distribution becoming more skewed at later stages (Figure 9A, B). These  
522 results indicate that GluRIIA/GluRIIB fluorescence distribution is highly heterogeneous by the  
523 early 3<sup>rd</sup> instar stage, with the brightest GluRIIA positive PSDs, and by extension their  
524 corresponding high  $P_r$  AZs, representing those that appeared earliest in development.

525 Over what time frame do synapses developmentally acquire high  $P_r$  properties? To  
526 estimate the average time required for this process, the interval from the first emergence of a  
527 synapse in an imaging session to the time point when segregation of GluRIIB around GluRIIA  
528 central puncta occurred was calculated. This analysis was restricted to newly formed AZs that  
529 appeared during the imaging sessions, and excluded AZs that were present in the first imaging  
530 session performed in 1<sup>st</sup> instar larvae. The average time from the first emergence of a synapse to  
531 when it acquired the segregated GluRIIA/B pattern observed at high  $P_r$  AZs was  $3.20 \pm 0.08$   
532 days ( $n = 41$  AZs from 7 NMJs from 3 animals, Figure 9C). In a small subset of PSDs (5%), a  
533 slightly faster accumulation of GluRIIA and the formation of GluRIIB peripheral rings was  
534 observed, but never faster than 2 days (Figure 8 - figure supplemental 2). Given that the  
535 developing NMJ is adding AZs at a rapid rate (Rasse et al., 2005; Schuster et al., 1996), we  
536 estimated if AZ maturation time identified over the course of our live imaging experiments

537 would fit with the 9.9% of high  $P_r$  sites observed at the early 3<sup>rd</sup> instar stage by GCaMP imaging.  
538 The number of synapses present at the same NMJ from the 1<sup>st</sup> instar through the early 3<sup>rd</sup> instar  
539 stage was quantified from live imaging experiments (Figure 9D). AZ number doubled each day,  
540 such that the average number of AZs found at the 1<sup>st</sup> instar stage (day 1) represented  $14.7 \pm 1.4\%$   
541 ( $n = 8$  NMJs from 3 animals) of all AZs present by day 4 (3 days after initial imaging in 1<sup>st</sup>  
542 instars). This value is similar to the 10% population of high  $P_r$  AZs observed during  $P_r$  mapping.  
543 Overall, these data support the hypothesis that AZ maturation is a key factor in regulating  $P_r$ ,  
544 leading to increased accumulation of  $\text{Ca}^{2+}$  channels and GluRIIA/GluRIIB segregation at high  $P_r$   
545 sites compared to AZs that are newly formed (<2 days).

546

## 547 **Discussion**

548 In the current study we used optical quantal imaging to examine the source of  
549 heterogeneity in evoked  $P_r$  across the AZ population at *Drosophila* NMJs. By combining quantal  
550 imaging with SIM microscopy, we first confirmed that release heterogeneity was not caused by  
551 summation of fusion events from multiple AZs. By monitoring release over 15 minute intervals,  
552 we also observed that  $P_r$  was a stable feature of each AZ. The *Drosophila* genome encodes a  
553 single member of the N/P/Q-type  $\text{Ca}^{2+}$  channel  $\alpha 1$  subunit family (Cac) that is present at AZs  
554 and is responsible for neurotransmitter release (Fouquet et al., 2009; Kawasaki et al., 2004, 2000;  
555 Littleton and Ganetzky, 2000; Liu et al., 2011; Rieckhof et al., 2003; Smith et al., 1996). Using  
556 transgenically labeled Cac lines, we found that Cac density at AZs strongly correlated with  $P_r$ .  
557 To directly visualize presynaptic  $\text{Ca}^{2+}$  influx at single AZs, GCaMP fusions to the core AZ  
558 component BRP (the *Drosophila* ELKS/CAST homolog) were generated. The levels of  $\text{Ca}^{2+}$   
559 influx at single AZs was highly correlated with both Cac density and  $P_r$ . In contrast, loss of the

560 Synaptotagmin 1 synaptic vesicle  $\text{Ca}^{2+}$  sensor did not change the heterogeneous distribution of  $P_r$   
561 across AZs.

562 High  $P_r$  AZs also displayed a distinct pattern of glutamate receptor clustering. Most PSDs  
563 showed a homogeneous distribution of the GluRIIA and GluRIIB containing subunits on the  
564 apposing postsynaptic membrane. In contrast, high  $P_r$  AZs were apposed by PSDs where  
565 GluRIIA receptors concentrated at the center of the AZ, with GluRIIB receptors forming a ring  
566 at the PSD periphery. A similar activity-dependent segregation of GluRIIA and a GluRIIA gating  
567 mutant has been previously observed at individual AZs in *Drosophila* (Petzoldt et al., 2014). In  
568 addition, anti-glutamate receptor antibody staining of wildtype larvae lacking tagged glutamate  
569 receptors identified a GluRIIB ring around the GluRIIA core in some mature 3<sup>rd</sup> instar NMJ AZs  
570 (Marrus et al., 2004). The correlation of  $P_r$  with GluRIIA accumulation is especially intriguing  
571 considering that this subunit has been implicated in homeostatic and activity-dependent plasticity  
572 (Davis, 2006; Frank, 2014; Petersen et al., 1997; Sigrist et al., 2003). By following the  
573 developmental acquisition of this postsynaptic property as a proxy for  $P_r$  from the 1<sup>st</sup> through 3<sup>rd</sup>  
574 instar larval stages via live imaging, we observed that the earliest formed AZs are the first to  
575 acquire this high  $P_r$  signature over a time course of ~3 days.

576 Similar to our prior observations (Melom et al., 2013), we found that most AZs at the  
577 *Drosophila* NMJ have a low  $P_r$ . For the current study, the AZ pool was artificially segregated  
578 into low and high release sites, with high releasing sites defined based on having a release rate  
579 greater than two standard deviations above the mean. Given that birthdate is a key predictor of  
580 glutamate receptor segregation, and by proxy  $P_r$ , we expect the AZ pool to actually reflect a  
581 continuum of  $P_r$  values based on their developmental history. However, using the two standard  
582 deviation criteria, 9.9% of AZs fell into the high  $P_r$  category, with an average  $P_r$  of 0.28 in

583 extracellular saline containing 1.3 mM  $\text{Ca}^{2+}$  and 20 mM  $\text{MgCl}_2$ . The remaining AZs that  
584 participated in evoked release had an average  $P_r$  of 0.05.  $\text{Ca}^{2+}$  channel density and  $\text{Ca}^{2+}$  influx at  
585 individual AZs was a key determinant of  $P_r$  heterogeneity, as evoked  $P_r$  and the density of Cac  
586 channels tagged with either TdTomato or GFP displayed a strong positive correlation (Pearson  $r$   
587 = 0.65 and Pearson  $r$  = 0.58, respectively). To bypass any unknown effects of channel tagging on  
588  $P_r$ , we also created a tool to directly visualize AZ  $\text{Ca}^{2+}$  influx by tethering GCaMP to the AZ  
589 protein BRP. Again, a strong correlation between  $\text{Ca}^{2+}$  influx and AZ  $P_r$  (Pearson  $r$  = 0.60) was  
590 observed, confirming that the levels of  $\text{Ca}^{2+}$  influx are a major determinant for synaptic vesicle  
591 fusion during an evoked response. Spontaneous fusion showed a much weaker correlation with  
592 both Cac density and  $\text{Ca}^{2+}$  influx at individual AZs, consistent with prior studies indicating  
593 spontaneous release rates are poorly correlated with external  $\text{Ca}^{2+}$  levels at this synapse (Jorquera  
594 et al., 2012; Lee et al., 2013). With synaptic vesicle fusion showing a steep non-linear  
595 dependence upon external  $\text{Ca}^{2+}$  with a slope of  $\sim 3$ -4 (Dodge and Rahamimoff, 1967;  
596 Heidelberger et al., 1994; Jan and Jan, 1976), a robust change in  $P_r$  could occur secondary to a  
597 relatively modest increase in  $\text{Ca}^{2+}$  channel density over development. Although the number of  
598  $\text{Ca}^{2+}$  channels at a *Drosophila* NMJ AZ is unknown, estimates of Cac-GFP fluorescence during  
599 quantal imaging indicate a  $\sim 2$ -fold increase in channel number would be necessary to move a  
600 low  $P_r$  AZ into the high  $P_r$  category. Similar correlations between evoked  $P_r$  and  $\text{Ca}^{2+}$  channel  
601 density have been found at mammalian synapses (Holderith et al., 2012; Nakamura et al., 2015;  
602 Sheng et al., 2012), suggesting this may represent a common mechanism for determining release  
603 strength at synapses.

604         Beyond low and high  $P_r$  sites, we found that 9.7% of the AZs analyzed displayed only  
605 spontaneous release. We could detect no fusion events for either evoked or spontaneous release

606 for another 14.6% of AZs that were defined by a GluRIIA-positive PSD in live imaging.  
607 Whether these cases represent immature AZs with extremely low evoked  $P_r$ , or distinct  
608 categories reflective of differences in AZ content, is unknown. For spontaneous-only sites, we  
609 previously found that the  $\Delta F/F_{\text{avg}}$  quantal signal detected postsynaptically by GCaMP imaging  
610 was similar to that observed at mixed mode AZs displaying both evoked and spontaneous events,  
611 indicating that there is unlikely to be a dramatic difference in glutamate receptor density at these  
612 sites versus low  $P_r$  AZs (Melom et al., 2013). Further categorization of spontaneous-only AZs  
613 and silent AZs will require the identification of unique makers that can be used to track them in  
614 live imaging during synaptic development.

615 Other factors we examined for regulating  $P_r$  were differences in local synaptic vesicle  
616 pools or synaptic vesicle protein content or state (for example, phosphorylation).  $P_r$  was largely  
617 unchanged with either 5-minute rest or 5 minute 5 Hz stimulation between imaging sessions.  
618 Although  $P_r$  may be more dynamic over longer intervals, the observation that developmental  
619 maturation of glutamate receptor segregation occurs over  $\sim 3$  days is consistent with  $P_r$  being a  
620 stable feature of the AZ over shorter time periods (hours to  $\sim 1$  day). To further examine the role  
621 of potential heterogeneity due to differences in synaptic vesicle proteins, we assayed  
622 whether  $P_r$  heterogeneity was abolished in mutants lacking the  $\text{Ca}^{2+}$  sensor Synaptotagmin 1, a  
623 major regulator of  $P_r$  (DiAntonio and Schwarz, 1994; Fernández-Chacón et al., 2001; Geppert et  
624 al., 1994; Littleton et al., 1994, 1993; Yoshihara and Littleton, 2002). GCaMP imaging  
625 confirmed that release was dramatically reduced and largely asynchronous in *syt1* nulls, and that  
626 mini frequency per AZ was increased. Although  $P_r$  was reduced in *syt1*,  $P_r$  distribution among  
627 different AZs remained heterogeneous, suggesting that the AZ, rather than differential  
628 distribution of Syt1, is critical. Although roles for other synaptic vesicle proteins in  $P_r$



629 heterogeneity cannot be excluded, the observation that prolonged 5 Hz stimulation, which would  
630 be predicted to turn over the synaptic vesicle pool, does not change  $P_r$  argues against this  
631 hypothesis. Instead, these data support a model that differences in the abundance of presynaptic  
632  $\text{Ca}^{2+}$  channels underlies heterogeneous AZ  $P_r$ .

633 We considered several models for how AZs acquire this heterogeneous nature of  $P_r$ ,  
634 distribution. One possibility is that unique AZs gain high  $P_r$  status through a mechanism that  
635 would result in preferential accumulation of key AZ components compared to their neighbors.  
636 Given that retrograde signaling from the muscle is known to drive synaptic development at  
637 *Drosophila* NMJs (Ball et al., 2010; Berke et al., 2013; Harris and Littleton, 2015; Keshishian  
638 and Kim, 2004; McCabe et al., 2003; Piccioli and Littleton, 2014; Yoshihara et al., 2005), certain  
639 AZ populations might have preferential access to specific signaling factors that would alter their  
640  $P_r$  state. Another model is that AZs compete for key presynaptic  $P_r$  regulators through an  
641 activity-dependent process. Once an AZ achieves a slight imbalance over its neighbors in release  
642 strength, it would then “win” and preferentially accumulate AZ material, similar to the concept  
643 of synapse elimination during motor neuron competition at mammalian NMJs (Tapia et al.,  
644 2012). Finally, high  $P_r$  AZs might simply be more mature than their low  $P_r$  neighbors, having a  
645 longer timeframe to accumulate AZ components. This model would not require any AZ to gain a  
646 favored status. AZs that appeared first during development would have more time to accumulate  
647 AZ material at a rate that would be largely identical over all AZs. Given that the *Drosophila*  
648 NMJ is constantly forming new AZs at a rapid pace during development (Rasse et al., 2005;  
649 Schuster et al., 1996), newly formed AZs would take longer to mature, generating a population  
650 of “older” AZs that would increase their  $P_r$  at the same proportional rate as their newer  
651 neighbors. Given that GCaMP imaging indicates high  $P_r$  sites segregate GluRIIA and GluRIIB

652 differently from low  $P_r$  sites, with the IIA isoform preferentially localizing at the center of PSDs  
653 apposing high  $P_r$  AZs, we used developmental acquisition of this property as an indicator of high  
654  $P_r$  sites. Although segregation of glutamate receptors may not perfectly replicate the timing of  $P_r$   
655 acquisition during development, it is currently the best tool we have at our disposal for sequential  
656 live imaging. Based on the acquisition of GluRIIA/GluRIIB segregation, our data support the  
657 model that increases in  $P_r$  reflect a time-dependent maturation process at the NMJ. Indeed, AZs  
658 that developed later in imaging sessions showed a similar time course for acquiring the  
659 postsynaptic segregation of glutamate receptors, indicating a fixed developmental maturation  
660 from low to high  $P_r$  AZs that is likely to account for the majority of release heterogeneity at this  
661 connection. The continuous addition of new AZs, which double during each day of development,  
662 ensures that the overall ratio of high to low  $P_r$  sites remain relatively fixed at a low percentage,  
663 depending on developmental stage and the rate of new AZ addition.

664 We did not test the correlation of  $P_r$  with other AZ proteins besides Cac and BRP, but it  
665 would not be surprising to see a positive correlation with the density of many AZ proteins based  
666 on the observation that maturation time is a key determinant for  $P_r$ . AZ maturation is also likely  
667 to promote increased synaptic vesicle docking and availability, consistent with observations that  
668 correlate active zone size with either  $P_r$  or the readily releasable pool (Han et al., 2011; Holderith  
669 et al., 2012; Matkovic et al., 2013; Matz et al., 2010; Nakamura et al., 2015; Schikorski and  
670 Stevens, 1997; Wadel et al., 2007). Although it is poorly understood how AZs are assembled  
671 during development, our data would not support a model that AZs are fully preassembled during  
672 transport and then deposited as a single “quantal” entity onto the presynaptic membrane. Rather,  
673 these data support a model of seeding of AZ material that increases developmentally over time as  
674 AZs matures, consistent with several studies of AZ development in *Drosophila* (Böhme et al.,

675 2016; Fouquet et al., 2009). In theory, each AZ would have equal access to new AZ material, and  
676 accumulate it at a fairly constant rate, with birthdate being the primary factor in how much AZ  
677 material they contain, and correspondingly, their  $P_r$  status. Although no evidence for rapid  
678 changes in  $P_r$  were detected in the steady-state conditions used in the current study, homeostatic  
679 plasticity is known to alter  $P_r$  over a rapid time frame (~10 minutes) at the NMJ (Davis and  
680 Müller, 2015; Frank, 2014; Frank et al., 2006). It will be interesting to determine if Cac density  
681 can change over such a rapid window, or whether the enhanced release is mediated solely  
682 through changes in Cac function and  $\text{Ca}^{2+}$  influx (Müller and Davis, 2012). Changes in the  
683 temporal order of  $P_r$  development could also occur secondary to altered transport or capture of  
684 AZ material. For example, the large NMJ on muscle fibers 6 and 7 displays a gradient in  
685 synaptic transmission, with terminal branch boutons often showing a larger population of higher  
686  $P_r$  AZs (Guerrero et al., 2005; Peled and Isacoff, 2011). If AZ material is not captured by earlier  
687 synapses along the arbor, it would be predicted to accumulate in terminal boutons, potentially  
688 allowing these AZs greater access to key components, and subsequently increasing their rate of  
689  $P_r$  acquisition. In summary, our data indicate that  $\text{Ca}^{2+}$  channel density and  $\text{Ca}^{2+}$  influx at single  
690 AZs is a key determinant for release heterogeneity, and that developmental AZ maturation is a  
691 key factor in  $P_r$  at the *Drosophila* NMJ.

692

693 **Materials and methods**

694 *Drosophila stocks*

695 Flies were cultured at 25°C on standard medium. Actively crawling 3<sup>rd</sup> instar male and female  
696 larvae dwelling on top of the food were used for experiments unless noted. The following strains  
697 were used: UAS-myrGCaMP6s, UAS- GCaMP6m-BRPshort, pBid-lexAop-myrGcaMP6s, UAS-  
698 myrjRGECO; Elav-GAL4, Mef2-GAL4, UAS-CacGFP (provided by Richard Ordway); UAS-  
699 CacTdTomato (provided by Richard Ordway); GluRIIA-RFP (provided by Stephan Sigrist),  
700 GluRIIB-GFP (provided by Stephan Sigrist) and 44H10-LexAp65 (provided by Gerald Rubin).  
701 *sytI* null mutants were generated by crossing *sytI*<sup>N13</sup>, an intragenic *sytI* deficiency (Littleton et  
702 al., 1994), with *sytI*<sup>AD4</sup>, which truncates Syt1 before the transmembrane domain (DiAntonio and  
703 Schwarz, 1994).

704

705 *Transgenic constructs*

706 The fluorescent Ca<sup>2+</sup> sensor GCaMP6s was tethered to the plasma membrane with an N-terminal  
707 myristoylation (myr) sequence. The first 90 amino acids of Src64b, containing a myristoylation  
708 target sequence, were subcloned into pBID-UASc with EcoRI and BglII (creating pBID-UASc-  
709 myr). GCaMP6s cDNA (Addgene plasmid 40753) was cloned into pBID-UASc-myr with BglII  
710 and XbaI. To generate the UAS-GCaMP6m-Brp-short line, GCaMP6m (Addgene plasmid  
711 40754) cDNA and Brp-short (gift from Dr. Tobias Rasse) were PCR amplified and double  
712 digested with EcoRI/BglII and BglII/XbaI, respectively. The two cDNA fragments were ligated  
713 and the product was used to PCR amplify the fused GCaMP6m-Brp-short cDNA. The PCR

714 product was inserted into the vector backbone pBID-UASc after digestion with EcoRI and XbaI  
715 to generate the final plasmid pBID-UASc-GCaMP6m-Brp-short. To create UAS-myjRGECO,  
716 the vector backbone pBID-UASc-myr was digested with BglII and XbaI. jRGECO sequence was  
717 amplified from plasmid pGP-CMV-NES-jRGECO1a (gift from Dr. Douglas Kim, Addgene  
718 plasmid #61563). The digested backbone and insert were fused according to the Gibson  
719 assembly protocol using NEBuilder HighFidelity DNA Assembly Cloning Kit (E5520). To  
720 generate pBid-lexAop-myrGCaMP6s, myrGCaMP6s was amplified by PCR and inserted into  
721 pBid-lexAop-DSCP (gift from Brian McCabe) between NotI and XbaI sites. All transgenic  
722 *Drosophila* strains were generated by BestGene.

723

#### 724 *Immunocytochemistry*

725 Wandering 3<sup>rd</sup> instar larvae were dissected in Ca<sup>2+</sup>-free HL3 solution and fixed in 4%  
726 paraformaldehyde for 10 minutes, washed in PBT (PBS plus 0.1% Triton X-100) and blocked in  
727 5% normal goat serum (NGS) and 5% BSA in PBT for 15 minutes. Samples were incubated  
728 overnight with anti-BRP (NC82, 1:200) from the Developmental Studies Hybridoma Bank,  
729 washed for 1 hour in PBS and then incubated for 2-3 hours with Alexa Fluor 607-conjugated  
730 anti-mouse IgG at 1:1000 (Invitrogen).

731

#### 732 *Confocal imaging and data analysis*

733 Confocal images were obtained on a Zeiss Axio Imager 2 equipped with a spinning-disk  
734 confocal head (CSU-X1; Yokagawa) and ImagEM X2 EM-CCD camera (Hamamatsu). An

735 Olympus LUMFL N 60X objective with a 1.10 NA was used to acquire GCaMP6s imaging data  
736 at 7 to 8 Hz. A Zeiss pan-APOCHROMAT 63X objective with 1.40 NA was used for imaging  
737 stained or live animals. 3<sup>rd</sup> instar larvae were dissected in Ca<sup>2+</sup>-free HL3 containing 20 mM  
738 MgCl<sub>2</sub>. After dissection, preparations were maintained in HL3 with 20 mM MgCl<sub>2</sub> and 1.3 mM  
739 Ca<sup>2+</sup> for 5 minutes. To stimulate the NMJ, motor nerves were cut close to the ventral ganglion  
740 and sucked into a pipette. Single pulses of current were delivered every one second for myr-  
741 jRGECO mapping or every three seconds for GCaMP6s mapping with an AMPI Master-8  
742 stimulator using a stimulus strength just above the threshold for evoking EJPs. A 3D image stack  
743 was taken before the GCaMP imaging session to generate a full map of GluRIIA or Cac channel  
744 distribution. Later, single focal planes were imaged continuously for 4 –5 minutes to collect  
745 GCaMP signals. Volocity 3D Image Analysis software (PerkinElmer) was used to analyze  
746 images. All images were Gaussian filtered (fine) to reduce noise and a movement-correction  
747 algorithm was applied. To enhance identification of myrGCaMP6 flashes, background  
748 myrGCaMP fluorescence was subtracted by creating a composite stack of 5–6 images during  
749 intervals when no synaptic release occurred. To identify the position of GluRIIA receptors and  
750 corresponding Ca<sup>2+</sup> events, a 3D stack image of GluRIIA was merged to create a single plane.  
751 AZ position was identified using the “find spot” algorithm in Volocity 3.2 software that detects  
752 fluorescent peaks. ROIs with identical 5-pixel size (0.138 μm/pixel) were automatically  
753 generated by the software from identified GluRIIA spots. All GCaMP flashes were detected  
754 using the intensity threshold tool and assigned to specific ROIs based on proximity of their  
755 centroids. The time and location of Ca<sup>2+</sup> events were imported into Excel or Matlab for further  
756 analysis. The number of observed GCaMP events per AZ was divided by the number of  
757 delivered stimuli to calculate AZ  $P_r$ . Analysis of Cac, BRP, GluRIIA or GluRIIB intensities was

758 performed similarly, identifying AZ fluorescence peaks and defining 3 pixel square ROIs around  
759 each peak to calculate average fluorescence. Average AZ fluorescence intensities of 3-pixel  
760 square ROIs was also used for correlation analysis.

761

### 762 *Live imaging*

763 Larvae were anesthetized with SUPRANE (desflurane, USP) from Amerinet Choice (Zhang et  
764 al., 2010). Larvae were incubated in a petri dish with a small paper towel containing Suprane for  
765 1-2 minutes in a fume hood. Anesthetized larvae were positioned ventral side up on a glass slide  
766 between spacers made by transparent tape, which prevented extreme compression of the larvae.  
767 Different size spacers were required for the various larval stages. Larvae were covered with a  
768 thin film of halocarbon oil and then with a cover glass. NMJ synapses on muscle 26 in hemi-  
769 segment 2 or 3 were imaged. After an imaging session, larvae were placed in numbered  
770 chambers with food in a 25°C incubator. The same data acquisition settings were used to  
771 visualize NMJs at different larval stages. Larvae were imaged with either 6, 24 and 36 hours  
772 intervals for one data set (Figure 8 A-C), or for 24 hours intervals for the remaining datasets. To  
773 keep the size consistent between different time periods, images of the corresponding NMJ area at  
774 younger stages were cut (dashed areas in figures) and placed onto a black background. This  
775 presentation generated a similar orientation of the different size NMJs for easier comparison for  
776 Figure 8, Figure 9 and Figure 8-supplemental figure 2.

777

### 778 *Statistical analysis*

779 Statistical analysis was performed with GraphPad Prism using one-way ANOVA for comparison  
780 of samples within an experimental group, or Student's t-test for comparing two groups. Asterisks  
781 denote p-values of: \*,  $P \leq 0.05$ ; \*\*,  $P \leq 0.01$ ; and \*\*\*,  $P \leq 0.001$ . All histograms and measurements  
782 are shown as mean  $\pm$  SEM. Pearson coefficient of correlation was calculated in GraphPad Prism  
783 using the following parameters: - two-tailed P value and 95% confidence interval.

784

### 785 **Acknowledgements**

786 This work was supported by NIH grant MH104536 to J.T.L. K.L.C. was supported in part by  
787 NIH pre-doctoral training grant T32GM007287. We thank the Bloomington *Drosophila* Stock  
788 Center (NIH P40OD018537), the Developmental Studies Hybridoma Bank, Richard Ordway  
789 (Penn State University) and Stephan Sigrist (Freie Univesitat Berlin) for providing *Drosophila*  
790 strains, Eliza Vasile (Koch Institute) for help with SIM data acquisition, and members of the  
791 Littleton lab for helpful discussions and comments on the manuscript.

792

793



794 **References**

- 795 Acuna, C., Liu, X., Südhof, T.C., 2016. How to Make an Active Zone: Unexpected Universal  
796 Functional Redundancy between RIMs and RIM-BPs. *Neuron* 91, 792–807.  
797 doi:10.1016/j.neuron.2016.07.042
- 798 Andlauer, T.F.M. and Sigrist, S.J. 2012. *In vivo* imaging of *Drosophila* larval neuromuscular  
799 junctions to study synapse assembly. *Cold Spring Harb Protoc* 2012, 407–413.  
800 doi:10.1101/pdb.top068577
- 801 Atwood, H.L., Karunanithi, S., 2002. Diversification of synaptic strength: presynaptic elements.  
802 *Nat Rev Neurosci* 3, 497–516. doi:10.1038/nrn876
- 803 Augustine, G.J., Charlton, M.P., Smith, S.J., 1985. Calcium entry and transmitter release at  
804 voltage-clamped nerve terminals of squid. *J Physiol (Lond)* 367, 163–181.
- 805 Ball, R.W., Warren-Paquin, M., Tsurudome, K., Liao, E.H., Elazzouzi, F., Cavanagh, C., An, B.-  
806 S., Wang, T.-T., White, J.H., Haghghi, A.P., 2010. Retrograde BMP signaling controls  
807 synaptic growth at the NMJ by regulating trio expression in motor neurons. *Neuron* 66,  
808 536–549. doi:10.1016/j.neuron.2010.04.011
- 809 Berke, B., Wittnam, J., McNeill, E., Van Vactor, D.L., Keshishian, H., 2013. Retrograde BMP  
810 signaling at the synapse: a permissive signal for synapse maturation and activity-  
811 dependent plasticity. *J Neurosci* 33, 17937–17950. doi:10.1523/JNEUROSCI.6075-  
812 11.2013
- 813 Böhme, M.A., Beis, C., Reddy-Alla, S., Reynolds, E., Mampell, M.M., Grasskamp, A.T.,  
814 Lützkendorf, J., Bergeron, D.D., Driller, J.H., Babikir, H., Göttfert, F., Robinson, I.M.,  
815 O’Kane, C.J., Hell, S.W., Wahl, M.C., Stelzl, U., Loll, B., Walter, A.M., Sigrist, S.J.,  
816 2016. Active zone scaffolds differentially accumulate Unc13 isoforms to tune Ca(2+)  
817 channel-vesicle coupling. *Nat Neurosci* 19, 1311–1320. doi:10.1038/nn.4364
- 818 Branco, T., Staras, K., 2009. The probability of neurotransmitter release: variability and  
819 feedback control at single synapses. *Nat Rev Neurosci* 10, 373–383. doi:10.1038/nrn2634
- 820 Bruckner, J.J., Gratz, S.J., Slind, J.K., Geske, R.R., Cummings, A.M., Galindo, S.E., Donohue,  
821 L.K., O’Connor-Giles, K.M., 2012. Fife, a *Drosophila* Piccolo-RIM homolog, promotes  
822 active zone organization and neurotransmitter release. *J Neurosci* 32, 17048–17058.  
823 doi:10.1523/JNEUROSCI.3267-12.2012
- 824 Bruckner, J.J., Zhan, H., Gratz, S.J., Rao, M., Ukken, F., Zilberg, G., O’Connor-Giles, K.M.,  
825 2017. Fife organizes synaptic vesicles and calcium channels for high-probability  
826 neurotransmitter release. *J Cell Biol* 216, 231–246. doi:10.1083/jcb.201601098
- 827 Bucurenciu, I., Kulik, A., Schwaller, B., Frotscher, M., Jonas, P., 2008. Nanodomain coupling

- 828 between Ca<sup>2+</sup> channels and Ca<sup>2+</sup> sensors promotes fast and efficient transmitter release  
829 at a cortical GABAergic synapse. *Neuron* 57, 536–545. doi: 10.1016/  
830 j.neuron.2007.12.026
- 831 Catterall, W.A., Few, A.P., 2008. Calcium channel regulation and presynaptic plasticity. *Neuron*  
832 59, 882–901. doi:10.1016/j.neuron.2008.09.005
- 833 Chen, K., Featherstone, D.E., 2005. Discs-large (DLG) is clustered by presynaptic innervation  
834 and regulates postsynaptic glutamate receptor subunit composition in *Drosophila*. *BMC*  
835 *Biol* 3, 1. doi:10.1186/1741-7007-3-1
- 836 Chen, Z., Das, B., Nakamura, Y., DiGregorio, D.A., Young, S.M., 2015. Ca<sup>2+</sup> channel to  
837 synaptic vesicle distance accounts for the readily releasable pool kinetics at a functionally  
838 mature auditory synapse. *J Neurosci* 35, 2083–2100. doi:10.1523/JNEUROSCI.2753-  
839 14.2015
- 840 Cho, R.W., Buhl, L.K., Volfson, D., Tran, A., Li, F., Akbergenova, Y., Littleton, J.T., 2015.  
841 Phosphorylation of Complexin by PKA Regulates Activity-Dependent Spontaneous  
842 Neurotransmitter Release and Structural Synaptic Plasticity. *Neuron* 88, 749–761.  
843 doi:10.1016/j.neuron.2015.10.011
- 844 Dana, H., Mohar, B., Sun, Y., Narayan, S., Gordus, A., Hasseman, J.P., Tsegaye, G., Holt, G.T.,  
845 Hu, A., Walpita, D., Patel, R., Macklin, J.J., Bargmann, C.I., Ahrens, M.B., Schreiter,  
846 E.R., Jayaraman, V., Looger, L.L., Svoboda, K., Kim, D.S., 2016. Sensitive red protein  
847 calcium indicators for imaging neural activity. *elife* 5. doi:10.7554/eLife.12727
- 848 Davis, G.W., 2006. Homeostatic control of neural activity: from phenomenology to molecular  
849 design. *Annu Rev Neurosci* 29, 307–323. doi:10.1146/annurev.neuro.28.061604.135751
- 850 Davis, G.W., Müller, M., 2015. Homeostatic control of presynaptic neurotransmitter release.  
851 *Annu Rev Physiol* 77, 251–270. doi:10.1146/annurev-physiol-021014-071740
- 852 DiAntonio, A., Petersen, S.A., Heckmann, M., Goodman, C.S., 1999. Glutamate receptor  
853 expression regulates quantal size and quantal content at the *Drosophila* neuromuscular  
854 junction. *J. Neurosci.* 19, 3023--3032.
- 855 DiAntonio, A., Schwarz, T.L., 1994. The effect on synaptic physiology of synaptotagmin  
856 mutations in *Drosophila*. *Neuron* 12, 909–920.
- 857 Dodge, F.A., Rahamimoff, R., 1967. Co-operative action a calcium ions in transmitter release at  
858 the neuromuscular junction. *J Physiol (Lond)* 193, 419–432.
- 859 Dolphin, A.C., Huston, E., Pearson, H., Menon-Johanssen, A., Sweeney, M.I., Adams, M.E.,  
860 Scott, R.H., 1991. G protein modulation of calcium entry and transmitter release. *Ann N*  
861 *Y Acad Sci* 635, 139–152.

- 862 Eggermann, E., Bucurenciu, I., Goswami, S.P., Jonas, P., 2011. Nanodomain coupling between  
863  $\text{Ca}^{2+}$  channels and sensors of exocytosis at fast mammalian synapses. *Nat Rev Neurosci*  
864 13, 7–21. doi:10.1038/nrn3125
- 865 Ehmann, N., van de Linde, S., Alon, A., Ljaschenko, D., Keung, X.Z., Holm, T., Rings, A.,  
866 DiAntonio, A., Hallermann, S., Ashery, U., Heckmann, M., Sauer, M., Kittel, R.J., 2014.  
867 Quantitative super-resolution imaging of Bruchpilot distinguishes active zone states. *Nat*  
868 *Commun* 5, 4650. doi:10.1038/ncomms5650
- 869 Élteš, T., Kirizs, T., Nusser, Z., Holderith, N., 2017. Target Cell Type-Dependent Differences in  
870  $\text{Ca}^{2+}$  Channel Function Underlie Distinct Release Probabilities at Hippocampal  
871 Glutamatergic Terminals. *J Neurosci* 37, 1910–1924. doi:10.1523/JNEUROSCI.2024-  
872 16.2017
- 873 Evans, R.M., Zamponi, G.W., 2006. Presynaptic  $\text{Ca}^{2+}$  channels--integration centers for neuronal  
874 signaling pathways. *Trends Neurosci* 29, 617–624. doi:10.1016/j.tins.2006.08.006
- 875 Featherstone, D.E., Rushton, E., Rohrbough, J., Liebl, F., Karr, J., Sheng, Q., Rodesch, C.K.,  
876 Brodie, K., 2005. An essential *Drosophila* glutamate receptor subunit that functions in  
877 both central neuropil and neuromuscular junction. *J. Neurosci.* 25, 3199--3208.
- 878 Feeney, C.J., Karunanithi, S., Pearce, J., Govind, C.K., Atwood, H.L., 1998. Motor nerve  
879 terminals on abdominal muscles in larval flesh flies, *Sarcophaga bullata*: comparisons  
880 with *Drosophila*. *J Comp Neurol* 402, 197–209. doi:10.1002/(SICI)1096-  
881 9861(19981214)402:2<197::AID-CNE5>3.0.CO;2-Q
- 882 Fernández-Chacón, R., Königstorfer, A., Gerber, S.H., García, J., Matos, M.F., Stevens, C.F.,  
883 Brose, N., Rizo, J., Rosenmund, C., Südhof, T.C., 2001. Synaptotagmin I functions as a  
884 calcium regulator of release probability. *Nature* 410, 41–49. doi:10.1038/35065004
- 885 Fouquet, W., Oswald, D., Wichmann, C., Mertel, S., Depner, H., Dyba, M., Hallermann, S.,  
886 Kittel, R.J., Eimer, S., Sigrist, S.J., 2009. Maturation of active zone assembly by  
887 *Drosophila* Bruchpilot. *J Cell Biol* 186, 129–145. doi:10.1083/jcb.200812150
- 888 Frank, C.A., 2014. Homeostatic plasticity at the *Drosophila* neuromuscular junction.  
889 *Neuropharmacology* 78, 63–74. doi:10.1016/j.neuropharm.2013.06.015
- 890 Frank, C.A., Kennedy, M.J., Goold, C.P., Marek, K.W., Davis, G.W., 2006. Mechanisms  
891 underlying the rapid induction and sustained expression of synaptic homeostasis. *Neuron*  
892 52, 663–677. doi:10.1016/j.neuron.2006.09.029
- 893 Füger, P., Behrends, L.B., Mertel, S., Sigrist, S.J. and Rasse, T.M., 2007. Live imaging of  
894 synapse development and measuring protein dynamics using two-color fluorescence  
895 recovery after photo-bleaching at *Drosophila* synapses. *Nat Protoc* 2, 3285–3298.

- 896           doi:10.1038/nprot.2007.472
- 897   Geppert, M., Goda, Y., Hammer, R.E., Li, C., Rosahl, T.W., Stevens, C.F., Südhof, T.C., 1994.  
898           Synaptotagmin I: a major Ca<sup>2+</sup> sensor for transmitter release at a central synapse. *Cell* 79,  
899           717–727. doi:10.1016/0092-8674(94)90556-8
- 900   Glebov, O.O., Jackson, R.E., Winterflood, C.M., Owen, D.M., Barker, E.A., Doherty, P., Ewers,  
901           H. and Burrone, J., 2017. Nanoscale structural plasticity of the active zone matrix  
902           modulates presynaptic function. *Cell Rep* 18, 2715–2728.  
903           doi:10.1016/j.celrep.2017.02.064
- 904   Graf, E.R., Valakh, V., Wright, C.M., Wu, C., Liu, Z., Zhang, Y.Q., DiAntonio, A., 2012. RIM  
905           promotes calcium channel accumulation at active zones of the *Drosophila* neuromuscular  
906           junction. *J Neurosci* 32, 16586–16596. doi:10.1523/JNEUROSCI.0965-12.2012
- 907   Graf, E.R., Valakh, V., Wright, C.M., Wu, C., Liu, Z., Zhang, Y.Q. and DiAntonio, A., 2009.  
908           Rab3 dynamically controls protein composition at active zones. *Neuron* 64, 663–677.  
909           doi:10.1016/j.neuron.2009.11.002
- 910   Guan, Z., Bykhovskaia, M., Jorquera, R.A., Sutton, R.B., Akbergenova, Y., Littleton, J.T., 2017.  
911           A synaptotagmin suppressor screen indicates SNARE binding controls the timing and  
912           Ca<sup>2+</sup> cooperativity of vesicle fusion. *elife* 6. doi:10.7554/eLife.28409
- 913   Guerrero, G., Reiff, D.F., Agarwal, G., Ball, R.W., Borst, A., Goodman, C.S., Isacoff, E.Y.,  
914           2005. Heterogeneity in synaptic transmission along a *Drosophila* larval motor axon. *Nat*  
915           *Neurosci* 8, 1188–1196. doi:10.1038/nn1526
- 916   Han, Y., Kaeser, P.S., Südhof, T.C., Schneggenburger, R., 2011. RIM determines Ca<sup>2+</sup> channel  
917           density and vesicle docking at the presynaptic active zone. *Neuron* 69, 304–316.  
918           doi:10.1016/j.neuron.2010.12.014
- 919   Harris, K.P., Littleton, J.T., 2015. Transmission, development, and plasticity of synapses.  
920           *Genetics* 201, 345–375. doi:10.1534/genetics.115.176529
- 921   Heidelberger, R., Heinemann, C., Neher, E., Matthews, G., 1994. Calcium dependence of the  
922           rate of exocytosis in a synaptic terminal. *Nature* 371, 513–515. doi:10.1038/371513a0
- 923   Holderith, N., Lorincz, A., Katona, G., Rózsa, B., Kulik, A., Watanabe, M., Nusser, Z., 2012.  
924           Release probability of hippocampal glutamatergic terminals scales with the size of the  
925           active zone. *Nat Neurosci* 15, 988–997. doi:10.1038/nn.3137
- 926   Jan, L.Y., Jan, Y.N., 1976. Properties of the larval neuromuscular junction in *Drosophila*  
927           *melanogaster*. *J Physiol (Lond)* 262, 189–214.
- 928   Johansen, J., Halpern, M.E., Johansen, K.M., Keshishian, H., 1989. Stereotypic morphology of

- 929 glutamatergic synapses on identified muscle cells of *Drosophila* larvae. *J Neurosci* 9,  
930 710–725.
- 931 Jorquera, R.A., Huntwork-Rodriguez, S., Akbergenova, Y., Cho, R.W., Littleton, J.T., 2012.  
932 Complexin controls spontaneous and evoked neurotransmitter release by regulating the  
933 timing and properties of synaptotagmin activity. *J Neurosci* 32, 18234–18245.  
934 doi:10.1523/JNEUROSCI.3212-12.2012
- 935 Katz, B., Miledi, R., 1967. The timing of calcium action during neuromuscular transmission. *J*  
936 *Physiol (Lond)* 189, 535–544. doi:10.1113/jphysiol.1967.sp008183
- 937 Katz, B., Miledi, R., 1969. Spontaneous and evoked activity of motor nerve endings in calcium  
938 Ringer. *J Physiol (Lond)* 203, 689–706.
- 939 Katz, B.S., 1969. The Release of Neural Transmitter Substances (Sherrington Lecture): Bernard  
940 S. Katz: 9780853230601: Amazon.com: Books. Liverpool University Press.
- 941 Kaufmann, N., DeProto, J., Ranjan, R., Wan, H., Van Vactor, D., 2002. *Drosophila* liprin-alpha  
942 and the receptor phosphatase Dlar control synapse morphogenesis. *Neuron* 34, 27–38.  
943 doi:10.1016/S0896-6273(02)00643-8
- 944 Kawasaki, F., Felling, R., Ordway, R.W., 2000. A temperature-sensitive paralytic mutant defines  
945 a primary synaptic calcium channel in *Drosophila*. *J Neurosci* 20, 4885–4889.
- 946 Kawasaki, F., Zou, B., Xu, X., Ordway, R.W., 2004. Active zone localization of presynaptic  
947 calcium channels encoded by the *cacophony* locus of *Drosophila*. *J Neurosci* 24, 282–  
948 285. doi:10.1523/JNEUROSCI.3553-03.2004
- 949 Keller, D., Babai, N., Kochubey, O., Han, Y., Markram, H., Schürmann, F., Schneggenburger,  
950 R., 2015. An Exclusion Zone for Ca<sup>2+</sup> Channels around Docked Vesicles Explains  
951 Release Control by Multiple Channels at a CNS Synapse. *PLoS Comput Biol* 11,  
952 e1004253. doi:10.1371/journal.pcbi.1004253
- 953 Keshishian, H., Kim, Y.-S., 2004. Orchestrating development and function: retrograde BMP  
954 signaling in the *Drosophila* nervous system. *Trends Neurosci* 27, 143–147.  
955 doi:10.1016/j.tins.2004.01.004
- 956 Kittel, R.J., Wichmann, C., Rasse, T.M., Fouquet, W., Schmidt, M., Schmid, A., Wagh, D.A.,  
957 Pawlu, C., Kellner, R.R., Willig, K.I., Hell, S.W., Buchner, E., Heckmann, M., Sigrist,  
958 S.J., 2006. Bruchpilot promotes active zone assembly, Ca<sup>2+</sup> channel clustering, and  
959 vesicle release. *Science* 312, 1051–1054. doi:10.1126/science.1126308
- 960 Kohsaka, H., Nose, A., 2009. Target recognition at the tips of postsynaptic filopodia:  
961 accumulation and function of Capricious. *Development (Cambridge, England)* 136, 1127-  
962 -1135.

- 963 Körber, C., Kuner, T., 2016. Molecular machines regulating the release probability of synaptic  
964 vesicles at the active zone. *Front Synaptic Neurosci* 8, 5. doi:10.3389/fnsyn.2016.00005
- 965 Lee, J., Guan, Z., Akbergenova, Y., Littleton, J.T., 2013. Genetic analysis of synaptotagmin C2  
966 domain specificity in regulating spontaneous and evoked neurotransmitter release. *J*  
967 *Neurosci* 33, 187–200. doi:10.1523/JNEUROSCI.3214-12.2013
- 968 Littleton, J.T., Ganetzky, B., 2000. Ion channels and synaptic organization: analysis of the  
969 *Drosophila* genome. *Neuron* 26, 35–43.
- 970 Littleton, J.T., Stern, M., Perin, M., Bellen, H.J., 1994. Calcium dependence of neurotransmitter  
971 release and rate of spontaneous vesicle fusions are altered in *Drosophila* synaptotagmin  
972 mutants. *Proc Natl Acad Sci U S A* 91, 10888–10892.
- 973 Littleton, J.T., Stern, M., Schulze, K., Perin, M., Bellen, H.J., 1993. Mutational analysis of  
974 *Drosophila* synaptotagmin demonstrates its essential role in Ca<sup>2+</sup>-activated  
975 neurotransmitter release. *Cell* 74, 1125–1134.
- 976 Liu, K.S.Y., Siebert, M., Mertel, S., Knoche, E., Wegener, S., Wichmann, C., Matkovic, T.,  
977 Muhammad, K., Depner, H., Mettke, C., Bückers, J., Hell, S.W., Müller, M., Davis,  
978 G.W., Schmitz, D., Sigrist, S.J., 2011. RIM-binding protein, a central part of the active  
979 zone, is essential for neurotransmitter release. *Science* 334, 1565–1569.  
980 doi:10.1126/science.1212991
- 981 Liu, S., Liu, Q., Tabuchi, M., Wu, M.N., 2016. Sleep drive is encoded by neural plastic changes  
982 in a dedicated circuit. *Cell* 165, 1347–1360. doi:10.1016/j.cell.2016.04.013
- 983 Marrus, S.B., Diantonio, A., 2004. Preferential localization of glutamate receptors opposite sites  
984 of high presynaptic release. *Curr. Biol.* 14, 924--931.
- 985 Marrus, S.B., Portman, S.L., Allen, M.J., Moffat, K.G., Diantonio, A., 2004. Differential  
986 localization of glutamate receptor subunits at the *Drosophila* neuromuscular junction. *J.*  
987 *Neurosci.* 24, 1406--1415.
- 988 Marrus, S.C.O.T.T.B., DiAntonio, A.A.R.O.N., 2004. Preferential localization of glutamate  
989 receptors opposite sites of high presynaptic release. *Curr Biol* 14, 924–931.  
990 doi:10.1016/j.cub.2004.05.047
- 991 Maschi, D., Klyachko, V.A., 2017. Spatiotemporal regulation of synaptic vesicle fusion sites in  
992 central synapses. *Neuron* 94, 65–73.e3. doi:10.1016/j.neuron.2017.03.006
- 993 Matkovic, T., Siebert, M., Knoche, E., Depner, H., Mertel, S., Oswald, D., Schmidt, M., Thomas,  
994 U., Sickmann, A., Kamin, D., Hell, S.W., Bürger, J., Hollmann, C., Mielke, T.,  
995 Wichmann, C., Sigrist, S.J., 2013. The Bruchpilot cytomatrix determines the size of the  
996 readily releasable pool of synaptic vesicles. *J Cell Biol* 202, 667–683.



- 997           doi:10.1083/jcb.201301072
- 998   Matz, J., Gilyan, A., Kolar, A., McCarvill, T., Krueger, S.R., 2010. Rapid structural alterations  
999           of the active zone lead to sustained changes in neurotransmitter release. *Proc Natl Acad*  
1000           *Sci U S A* 107, 8836–8841. doi:10.1073/pnas.0906087107
- 1001   McCabe, B.D., Marqués, G., Haghghi, A.P., Fetter, R.D., Crotty, M.L., Haerry, T.E., Goodman,  
1002           C.S., O’Connor, M.B., 2003. The BMP homolog Gbb provides a retrograde signal that  
1003           regulates synaptic growth at the *Drosophila* neuromuscular junction. *Neuron* 39, 241–  
1004           254. doi:10.1016/S0896-6273(03)00426-4
- 1005   Meinrenken, C.J., Borst, J.G.G., Sakmann, B., 2002. Calcium secretion coupling at calyx of Held  
1006           governed by nonuniform channel-vesicle topography. *J Neurosci* 22, 1648–1667.
- 1007   Meinrenken, C.J., Borst, J.G.G., Sakmann, B., 2003. Local routes revisited: the space and time  
1008           dependence of the Ca<sup>2+</sup> signal for phasic transmitter release at the rat calyx of Held. *J*  
1009           *Physiol (Lond)* 547, 665–689. doi:10.1113/jphysiol.2002.032714
- 1010   Melom, J.E., Akbergenova, Y., Gavornik, J.P., Littleton, J.T., 2013. Spontaneous and evoked  
1011           release are independently regulated at individual active zones. *J Neurosci* 33, 17253–  
1012           17263. doi:10.1523/JNEUROSCI.3334-13.2013
- 1013   Muhammad, K., Reddy-Alla, S., Driller, J.H., Schreiner, D., Rey, U., Böhme, M.A., Hollmann,  
1014           C., Ramesh, N., Depner, H., Lützkendorf, J., Matkovic, T., Götz, T., Bergeron, D.D.,  
1015           Schmoranzler, J., Goettfert, F., Holt, M., Wahl, M.C., Hell, S.W., Scheiffele, P., Walter,  
1016           A.M., Loll, B., Sigrist, S.J., 2015. Presynaptic spinophilin tunes neurexin signalling to  
1017           control active zone architecture and function. *Nat Commun* 6, 8362.  
1018           doi:10.1038/ncomms9362
- 1019   Müller, M., Davis, G.W., 2012. Transsynaptic control of presynaptic Ca<sup>2+</sup> influx achieves  
1020           homeostatic potentiation of neurotransmitter release. *Curr Biol* 22, 1102–1108.  
1021           doi:10.1016/j.cub.2012.04.018
- 1022   Nakamura, Y., Harada, H., Kamasawa, N., Matsui, K., Rothman, J.S., Shigemoto, R., Silver,  
1023           R.A., DiGregorio, D.A., Takahashi, T., 2015. Nanoscale distribution of presynaptic  
1024           Ca(2+) channels and its impact on vesicular release during development. *Neuron* 85,  
1025           145–158. doi:10.1016/j.neuron.2014.11.019
- 1026   Newman, Z.L., Hoagland, A., Aghi, K., Worden, K., Levy, S.L., Son, J.H., Lee, L.P., Isacoff,  
1027           E.Y., 2017. Input-Specific Plasticity and Homeostasis at the *Drosophila* Larval  
1028           Neuromuscular Junction. *Neuron* 93, 1388–1404.e10. doi:10.1016/j.neuron.2017.02.028
- 1029   Owald, D., Fouquet, W., Schmidt, M., Wichmann, C., Mertel, S., Depner, H., Christiansen, F.,  
1030           Zube, C., Quentin, C., Körner, J., Urlaub, H., Mechtler, K., Sigrist, S.J., 2010. A Syd-1

- 1031           homologue regulates pre- and postsynaptic maturation in *Drosophila*. *J Cell Biol* 188,  
1032           565–579. doi:10.1083/jcb.200908055
- 1033   Owald, D., Khorramshahi, O., Gupta, V.K., Banovic, D., Depner, H., Fouquet, W., Wichmann,  
1034   C., Mertel, S., Eimer, S., Reynolds, E., Holt, M., Aberle, H., Sigrist, S.J., 2012.  
1035   Cooperation of Syd-1 with Neurexin synchronizes pre- with postsynaptic assembly. *Nat*  
1036   *Neurosci* 15, 1219–1226. doi:10.1038/nn.3183
- 1037   Peled, E.S., Isacoff, E.Y., 2011. Optical quantal analysis of synaptic transmission in wild-type  
1038   and *rab3*-mutant *Drosophila* motor axons. *Nat Neurosci* 14, 519–526.  
1039   doi:10.1038/nn.2767
- 1040   Peled, E.S., Newman, Z.L., Isacoff, E.Y., 2014. Evoked and spontaneous transmission favored  
1041   by distinct sets of synapses. *Curr Biol* 24, 484–493. doi:10.1016/j.cub.2014.01.022
- 1042   Petersen, S.A., Fetter, R.D., Noordermeer, J.N., Goodman, C.S., DiAntonio, A., 1997. Genetic  
1043   analysis of glutamate receptors in *Drosophila* reveals a retrograde signal regulating  
1044   presynaptic transmitter release. *Neuron* 19, 1237–1248.
- 1045   Petzoldt, A.G., Lee, Y.H., Khorramshahi, O., Reynolds, E., Plested, A.J., Herzel, H., Sigrist, S.J.,  
1046   2014. Gating characteristics control glutamate receptor distribution and trafficking  
1047   *in vivo*. *Curr Biol* 24, 2059–2065. doi:10.1016/j.cub.2014.07.051
- 1048   Piccioli, Z.D., Littleton, J.T., 2014. Retrograde BMP signaling modulates rapid activity-  
1049   dependent synaptic growth via presynaptic LIM kinase regulation of cofilin. *J Neurosci*  
1050   34, 4371–4381. doi:10.1523/JNEUROSCI.4943-13.2014
- 1051   Qin, G., Schwarz, T., Kittel, R.J., Schmid, A., Rasse, T.M., Kappei, D., Ponimaskin, E.,  
1052   Heckmann, M., Sigrist, S.J., 2005. Four different subunits are essential for expressing the  
1053   synaptic glutamate receptor at neuromuscular junctions of *Drosophila*. *J Neurosci* 25,  
1054   3209–3218. doi:10.1523/JNEUROSCI.4194-04.2005
- 1055   Rasse, T.M., Fouquet, W., Schmid, A., Kittel, R.J., Mertel, S., Sigrist, C.B., Schmidt, M.,  
1056   Guzman, A., Merino, C., Qin, G., Quentin, C., Madeo, F.F., Heckmann, M., and Sigrist,  
1057   S.J., 2005. Glutamate receptor dynamics organizing synapse formation *in vivo*. *Nat*  
1058   *Neurosci* 8, 898–905. doi:10.1038/nn1484
- 1059   Reddy-Alla, S., Böhme, M.A., Reynolds, E., Beis, C., Grasskamp, A.T., Mampell, M.M.,  
1060   Maglione, M., Jusyte, M., Rey, U., Babikir, H., McCarthy, A.W., Quentin, C., Matkovic,  
1061   T., Bergeron, D.D., Mushtaq, Z., Göttfert, F., Oswald, D., Mielke, T., Hell, S.W., Sigrist,  
1062   S.J. and Walter, A.M., 2017. Stable positioning of *unc13* restricts synaptic vesicle fusion  
1063   to defined release sites to promote synchronous neurotransmission. *Neuron* 95, 1350–  
1064   1364.e12. doi:10.1016/j.neuron.2017.08.016



- 1065 Reid, C.A., Bekkers, J.M., Clements, J.D., 2003. Presynaptic Ca<sup>2+</sup> channels: a functional  
1066 patchwork. Trends Neurosci 26, 683–687. doi:10.1016/j.tins.2003.10.003
- 1067 Rieckhof, G.E., Yoshihara, M., Guan, Z., Littleton, J.T., 2003. Presynaptic N-type calcium  
1068 channels regulate synaptic growth. J Biol Chem 278, 41099–41108.  
1069 doi:10.1074/jbc.M306417200
- 1070 Ritzenthaler, S., Chiba, A., 2003. Myopodia (postsynaptic filopodia) participate in synaptic  
1071 target recognition. J Neurobiol 55, 31–40. doi:10.1002/neu.10180
- 1072 Ritzenthaler, S., Suzuki, E., Chiba, A., 2000. Postsynaptic filopodia in muscle cells interact with  
1073 innervating motoneuron axons. Nat Neurosci 3, 1012–1017. doi:10.1038/79833
- 1074 Schikorski, T., Stevens, C.F., 1997. Quantitative ultrastructural analysis of hippocampal  
1075 excitatory synapses. J Neurosci 17, 5858–5867.
- 1076 Schmid, A., Hallermann, S., Kittel, R.J., Khorramshahi, O., Frölich, A.M.J., Quentin, C., Rasse,  
1077 T.M., Mertel, S., Heckmann, M., and Sigrist, S.J., 2008. Activity-dependent site-specific  
1078 changes of glutamate receptor composition *in vivo*. Nat Neurosci 11, 659–666.  
1079 doi:10.1038/nn.2122
- 1080 Schoch, S., Gundelfinger, E.D., 2006. Molecular organization of the presynaptic active zone.  
1081 Cell Tissue Res 326, 379–391. doi:10.1007/s00441-006-0244-y
- 1082 Schuster, C.M., Davis, G.W., Fetter, R.D., Goodman, C.S., 1996. Genetic dissection of structural  
1083 and functional components of synaptic plasticity. I. Fasciclin II controls synaptic  
1084 stabilization and growth. Neuron 17, 641–654.
- 1085 Schuster, C.M., Ultsch, A., Schloss, P., Cox, J.A., Schmitt, B., Betz, H., 1991. Molecular cloning  
1086 of an invertebrate glutamate receptor subunit expressed in *Drosophila* muscle. Science  
1087 254, 112–114.
- 1088 Sheng, J., He, L., Zheng, H., Xue, L., Luo, F., Shin, W., Sun, T., Kuner, T., Yue, D.T., Wu, L.-  
1089 G., 2012. Calcium-channel number critically influences synaptic strength and plasticity at  
1090 the active zone. Nat Neurosci 15, 998–1006. doi:10.1038/nn.3129
- 1091 Sigrist, S.J., Reiff, D.F., Thiel, P.R., Steinert, J.R., Schuster, C.M., 2003. Experience-dependent  
1092 strengthening of *Drosophila* neuromuscular junctions. J. Neurosci. 23, 6546--6556.
- 1093 Smith, L.A., Wang, X., Peixoto, A.A., Neumann, E.K., Hall, L.M., Hall, J.C., 1996. A  
1094 *Drosophila* calcium channel alpha1 subunit gene maps to a genetic locus associated with  
1095 behavioral and visual defects. J Neurosci 16, 7868–7879.
- 1096 Stanley, E.F., 2016. The nanophysiology of fast transmitter release. Trends Neurosci 39, 183–  
1097 197. doi:10.1016/j.tins.2016.01.005

- 1098 Südhof, T.C., 2012. The presynaptic active zone. *Neuron* 75, 11–25.  
1099 doi:10.1016/j.neuron.2012.06.012
- 1100 Sugie, A., Hakeda-Suzuki, S., Suzuki, E., Silies, M., Shimozone, M., Möhl, C., Suzuki, T. and  
1101 Tavasani, G., 2015. Molecular Remodeling of the Presynaptic Active Zone of  
1102 *Drosophila* Photoreceptors via Activity-Dependent Feedback. *Neuron* 86, 711–725.  
1103 doi:10.1016/j.neuron.2015.03.046
- 1104 Tang, A.-H., Chen, H., Li, T.P., Metzbower, S.R., MacGillavry, H.D. and Blanpied, T.A., 2016.  
1105 A trans-synaptic nanocolumn aligns neurotransmitter release to receptors. *Nature* 536,  
1106 210–214. doi:10.1038/nature19058
- 1107 Tapia, J.C., Wylie, J.D., Kasthuri, N., Hayworth, K.J., Schalek, R., Berger, D.R., Guatimosim,  
1108 C., Seung, H.S., Lichtman, J.W., 2012. Pervasive synaptic branch removal in the  
1109 mammalian neuromuscular system at birth. *Neuron* 74, 816–829.  
1110 doi:10.1016/j.neuron.2012.04.017
- 1111 Tedford, H.W., Zamponi, G.W., 2006. Direct G protein modulation of Cav2 calcium channels.  
1112 *Pharmacol Rev* 58, 837–862. doi:10.1124/pr.58.4.11
- 1113 Van Vactor, D., Sigrist, S.J., 2017. Presynaptic morphogenesis, active zone organization and  
1114 structural plasticity in *Drosophila*. *Curr Opin Neurobiol* 43, 119–129.  
1115 doi:10.1016/j.conb.2017.03.003
- 1116 Wadel, K., Neher, E., Sakaba, T., 2007. The coupling between synaptic vesicles and Ca<sup>2+</sup>  
1117 channels determines fast neurotransmitter release. *Neuron* 53, 563–575.  
1118 doi:10.1016/j.neuron.2007.01.021
- 1119 Wagh, D.A., Rasse, T.M., Asan, E., Hofbauer, A., Schwenkert, I., Dürrbeck, H., Buchner, S.,  
1120 Dabauvalle, M.-C., Schmidt, M., Qin, G., Wichmann, C., Kittel, R., Sigrist, S.J.,  
1121 Buchner, E., 2006. Bruchpilot, a protein with homology to ELKS/CAST, is required for  
1122 structural integrity and function of synaptic active zones in *Drosophila*. *Neuron* 49, 833–  
1123 844. doi:10.1016/j.neuron.2006.02.008
- 1124 Wang, L.-Y., Neher, E., Taschenberger, H., 2008. Synaptic vesicles in mature calyx of Held  
1125 synapses sense higher nanodomain calcium concentrations during action potential-evoked  
1126 glutamate release. *J Neurosci* 28, 14450–14458. doi:10.1523/JNEUROSCI.4245-08.2008
- 1127 Wegel, E., Göhler, A., Lagerholm, B.C., Wainman, A., Uphoff, S., Kaufmann, R., Dobbie, I.M.,  
1128 2016. Imaging cellular structures in super-resolution with SIM, STED and Localisation  
1129 Microscopy: A practical comparison. *Sci Rep* 6, 27290. doi:10.1038/srep27290
- 1130 Weyhersmüller, A., Hallermann, S., Wagner, N. and Eilers, J., 2011. Rapid active zone  
1131 remodeling during synaptic plasticity. *J Neurosci* 31, 6041–6052.

- 1132           doi:10.1523/JNEUROSCI.6698-10.2011
- 1133   Wojtowicz, J.M., Marin, L., Atwood, H.L., 1994. Activity-induced changes in synaptic release  
1134           sites at the crayfish neuromuscular junction. *J Neurosci* 14, 3688–3703.
- 1135   Yoshihara, M., Adolfsen, B., Galle, K.T., Littleton, J.T., 2005. Retrograde signaling by Syt 4  
1136           induces presynaptic release and synapse-specific growth. *Science* 310, 858–863.  
1137           doi:10.1126/science.1117541
- 1138   Yoshihara, M., Adolfsen, B., Littleton, J.T., 2003. Is synaptotagmin the calcium sensor? *Curr*  
1139           *Opin Neurobiol* 13, 315–323.
- 1140   Yoshihara, M., Littleton, J.T., 2002. Synaptotagmin I functions as a calcium sensor to  
1141           synchronize neurotransmitter release. *Neuron* 36, 897–908.
- 1142   Yu, W., Kawasaki, F., Ordway, R.W., 2011. Activity-dependent interactions of NSF and SNAP  
1143           at living synapses. *Mol Cell Neurosci* 47, 19–27. doi:10.1016/j.mcn.2011.02.002
- 1144   Zamponi, G.W., Snutch, T.P., 1998. Modulation of voltage-dependent calcium channels by G  
1145           proteins. *Curr Opin Neurobiol* 8, 351–356.
- 1146   Zhai, R.G., Bellen, H.J., 2004. The architecture of the active zone in the presynaptic nerve  
1147           terminal. *Physiology (Bethesda)* 19, 262–270. doi:10.1152/physiol.00014.2004
- 1148   Z Zhang, Y., Fuger, P., Hannan, S.B., Kern, J.V., Lasky, B. and Rasse, T.M., 2010. In vivo  
1149           imaging of intact *Drosophila* larvae at sub-cellular resolution. *J Vis Exp*.  
1150           doi:10.3791/2249
- 1151   Zito, K., Parnas, D., Fetter, R.D., Isacoff, E.Y., Goodman, C.S., 1999. Watching a synapse grow:  
1152           noninvasive confocal imaging of synaptic growth in *Drosophila*. *Neuron* 22, 719–729.
- 1153

1154 **Figure Legends**

1155 **Figure 1.** High  $P_r$  sites correspond to single AZs with elevated levels of BRP. (A)  
1156 Representative images of consecutive evoked release events (green flashes) visualized by  
1157 expressing myrGCaMP6s in muscle 4. The position of each AZ was determined by expressing  
1158 GluRIIA-RFP to label the corresponding PSD. Evoked release triggers fusion across different  
1159 sets of AZs during each stimuli, but a subpopulation of AZs respond more frequently (arrow).  
1160 (B) Histogram of the distribution of AZ  $P_r$  for a 0.3 Hz 5-minute stimulation paradigm. AZs  
1161 classified as high  $P_r$  (>2 standard deviations above the mean) are shown in red. The percentage  
1162 of AZs that were low  $P_r$  (65.8%), high  $P_r$  (9.9%), spontaneous-only (9.7%) and silent (14.6%) is  
1163 displayed in the inset. (C) Average  $P_r$  determined for each individual experiment for the AZ  
1164 population categorized based on low and high activity sites (>2 standard deviations above the  
1165 mean). Each point represents the average for all AZs (classified as either high or low  $P_r$ ) from a  
1166 single animal. (D) Individual BRP puncta for three NMJs from three different animals imaged  
1167 with high resolution structured illumination microscopy (SIM, left panel) or confocal microscopy  
1168 (middle panel). The right panel displays the heat map for evoked  $P_r$  from the same NMJs  
1169 determined by GCaMP6s imaging prior to fixation. Representative high  $P_r$  sites are circled with  
1170 red in the middle panels. The far right top panel displays the results from the automated detection  
1171 algorithm that outlines individual AZs. (E) AZs were separated into high and low  $P_r$  based on  
1172 their activity and the fluorescence intensity of the corresponding BRP puncta is shown (from  
1173 conventional confocal images). (F) AZs with high BRP intensity (two standard deviations above  
1174 average) were preselected from conventional confocal images and identified on corresponding  
1175 SIM images. In cases where the BRP signal was resolvable into more than one AZ by SIM  
1176 microscopy, it was assigned to the AZ cluster group. In cases where the BRP signal mapped to a

1177 single BRP puncta by SIM imaging, it was assigned to the single AZ group.  $P_r$  is plotted for each  
1178 group. Student's t-test was used for statistical analysis (\*\*\*) =  $p \leq 0.001$ ). Error bars represent  
1179 SEM.

1180

1181 **Figure 2.** Stability of release maps at the NMJ. **(A)**  $P_r$  heatmaps for the same muscle 4 NMJ  
1182 were generated for two individual imaging sessions, separated by a 5-minute resting period. High  
1183  $P_r$  AZs were numbered and re-identified in each heatmap. Representative high  $P_r$  AZs that  
1184 sustain release rates during the second imaging session are noted with arrows. **(B)** Correlation of  
1185 AZ  $P_r$  between two imaging sessions separated by a 5-minute resting period. **(C)**  $P_r$  heatmaps for  
1186 the same NMJ separated by a 5-minute 5 Hz stimulation. Representative high  $P_r$  AZs that did not  
1187 change activity levels are noted with arrows. **(D)** Correlation of AZ  $P_r$  between two imaging  
1188 sessions separated by a 5-minute 5 Hz stimulation period.

1189

1190 **Figure 3.**  $P_r$  variability remains in *syt1* null mutants. **(A)** The left panel displays the distribution  
1191 of GluRIIA staining in *syt1* nulls (left panel) at the muscle 4 NMJ. The corresponding  $P_r$   
1192 heatmap is shown on the right. The arrows denote several high  $P_r$  sites opposed by bright  
1193 GluRIIA positive PSDs. **(B)** AZ release events per second for spontaneous release and evoked by  
1194 5 Hz stimulation are shown for *syt1* nulls mutants, and for spontaneous release in controls. **(C)**  
1195 Frequency distribution of  $P_r$  is shown for *syt1* nulls and controls. **(D)** Plot of normalized  $P_r$   
1196 frequency distribution (from 0 to 1 (max)) for *syt1* nulls and controls. **(E)** Cumulative frequency  
1197 distribution for normalized release rates for *syt1* nulls and controls is shown. Student's t-test was  
1198 used for statistical analysis (\*\*\*) =  $p \leq 0.001$ ). Error bars represent SEM.

1199

1200 **Figure 4.**  $P_r$  correlates with Cac channel density at AZs. (A) Representative images showing  
1201 heterogeneous distribution of Cac-TdTomato at the NMJ of muscle 4 (left panel). Evoked release  
1202 was visualized at the same NMJ using myrGCaMP6s (second panel) and AZ release maps were  
1203 generated for evoked (third panel) and spontaneous fusion (right panel). Several high  $P_r$  AZs  
1204 with bright Cac density are noted (arrows). (B) Correlation between AZ  $P_r$  and Cac-TdTomato  
1205 fluorescent intensity for evoked release. (C). Correlation between AZ spontaneous release rate  
1206 per second and Cac-TdTomato fluorescence intensity. (D) Representative images showing  
1207 heterogeneous distribution of Cac-GFP at the NMJ (left panel). Evoked release visualized at the  
1208 same NMJ by myr-jRGECO is shown in the second panel. The  $P_r$  heatmap for evoked release is  
1209 shown in the third panel. A heatmap distribution of Cac-GFP fluorescence intensities, based on  
1210 same criteria as color-coding of  $P_r$ , is shown in the right panel. The arrows denote several higher  
1211  $P_r$  sites containing bright Cac-GFP puncta. (E) Correlation between AZ  $P_r$  and Cac-GFP  
1212 fluorescence intensity for evoked release. (F) Cac-GFP fluorescence obtained for AZs  
1213 functionally classified as either low or high  $P_r$  (>2 standard deviations above mean) by quantal  
1214 imaging with myr-jRGECO1a. Student's t-test was used for statistical analysis (\*\*\*) =  $p \leq 0.001$ .  
1215 Error bars represent SEM.

1216

1217 **Figure 5.** GCaMP-BRP detects relative  $Ca^{2+}$  influx at single AZs and is correlated with Cac  
1218 channel density. (A) Representative images of the same muscle 4 NMJ bouton showing  
1219 CCaMP6m-BRP fluorescence at rest and following 10 Hz stimulation for two consecutive  
1220 rounds. (B) The AZ fluorescence intensity was plotted for three independent rounds of

1221 stimulation for BRP-GCaMP6m. Fluorescence changes per AZ remain stable for the same AZ  
1222 during multiple rounds of stimulation. (C) Histogram of the distribution of relative fluorescence  
1223 intensities ( $\Delta F$ ) across AZs for BRP-GCaMP6m. (D) Representative images showing  
1224 GCaMP6m-BRP fluorescence before (left panel) and during stimulation (middle panel). The  
1225 corresponding distribution of Cac channels labeled by Cac-TdTomato is shown for the same  
1226 NMJ (right panel). Examples of rare Cac-positive AZs that showed no corresponding  $Ca^{2+}$  influx  
1227 are indicated (arrows). (E) Correlation between GCaMP6m-BRP  $\Delta F$  during stimulation and Cac-  
1228 TdTomato fluorescence intensity at individual AZs.

1229

1230 **Figure 6.**  $P_r$  correlates with the relative levels of  $Ca^{2+}$  influx at AZs. (A) Two representative  
1231 muscle 4 NMJs with AZ  $P_r$  heatmaps obtained following myr-jRGECO mapping during  
1232 stimulation (left panel). GCaMP6m-BRP fluorescence levels of the same NMJ at rest (second  
1233 panel) and during stimulation (third panel) are shown. Heatmaps of GCaMP6m-BRP  $\Delta F$  during  
1234 stimulation are displayed in the right panel. Several representative high  $P_r$  AZs that experienced  
1235 the strongest  $Ca^{2+}$  influx detected by GCaMP-BRP are noted (arrows). (B) Correlation between  
1236 GCaMP6m-BRP  $\Delta F$  (during 10 Hz stimulation) and AZ  $P_r$  (during 1 Hz stimulation) is shown  
1237 across all experiments. (C) Representative correlation between GCaMP6m-BRP  $\Delta F$  and AZ  
1238 release rate per minute for evoked (red) and spontaneous (green) fusion for a representative  
1239 single NMJ.

1240

1241 **Figure 7.** High  $P_r$  AZs have elevated PSD GluRIIA levels and display a distinct pattern of  
1242 glutamate receptor clustering. (A) Representative image showing the heterogeneous distribution



1243 of GluRIIA-RFP (left panel) at a 3<sup>rd</sup> instar muscle 4 NMJ. More uniform GluRIIB-GFP PSD  
1244 puncta can also be observed over the much dimmer myrGCaMP6s (second panel). BRP  
1245 distribution (third panel) and  $P_r$  heatmaps (right panel) for the same NMJ are shown. The  
1246 correlation between AZ  $P_r$  and GluRIIA-RFP (**B**), GluRIIB (**C**) and BRP (**D**) fluorescence  
1247 intensity is plotted. (**E**) Representative images showing distribution of GluRIIA, GluRIIB and  
1248 BRP, without co-expression of myrGCaMP6s. Synapses containing bright GluRIIA puncta have  
1249 GluRIIB predominantly localized to the periphery of the PSD (arrows), surrounding a GluRIIA  
1250 core. These AZs have higher BRP intensities as well. (**F**) Fluorescence line profiles showing  
1251 GluRIIA, GluRIIB and BRP normalized fluorescence distribution across individual AZs. All  
1252 AZs were separated into two groups according to their GluRIIA brightness, with “bright” PSDs  
1253 based on their GluRIIA intensity (2 standard deviations above average). The peripheral  
1254 distribution of GluRIIB around central GluRIIA cores was only obvious for bright GluRIIA-  
1255 positive PSDs that were shown to be more active during stimulation. Correlation between  
1256 GluRIIA-RFP (**G**) or GluRIIB-GFP (**H**) with BRP intensity at individual AZs.

1257

1258 **Figure 8.** Glutamate receptor segregation during PSD development. (**A**) Two representative  
1259 muscle 26 NMJs visualized during live imaging in early 1<sup>st</sup> instar larvae expressing GluRIIA-  
1260 RFP and GluRIIB-GFP. The arrows denote GluRIIA-RFP positive extensions from the main  
1261 arbor that are devoid of detectable PSDs or GluRIIB at this stage of development. These  
1262 extensions disappear during imaging from later larval stages, but some go on to develop fully  
1263 formed synaptic boutons with new AZs (Figure 8 - supplemental figure 3). (**B**) Representative  
1264 serial time points of NMJ development visualized by repeated imaging through the cuticle of an  
1265 anesthetized larvae at the indicated time points beginning at the early 1<sup>st</sup> instar stage. Two of the



1266 five PSDs present during the first imaging session are labeled and are the first to develop the  
1267 peripheral GluRIIB segregation pattern 36 hours later. GluRIIB labeling alone is shown in the  
1268 bottom panel. The right panels show GluRIIB fluorescence and normalized GluRIIA and  
1269 GluRIIB fluorescent line profiles for the indicated PSDs at the initial imaging session (0 hour)  
1270 and 36 hours later. (C) Serial images of an NMJ with a larger number of AZs present at the 1<sup>st</sup>  
1271 instar stage. After 36 hours of development, the peripheral segregation of GluRIIB around  
1272 GluRIIA was first observed at PSDs that were present during the initial imaging session  
1273 (numbered). The right panels show GluRIIB fluorescence and normalized GluRIIA and GluRIIB  
1274 fluorescent line profiles for the indicated PSDs at the initial imaging session (0 hour) and 36  
1275 hours later. The dashed box surrounds the actual imaged segment of the NMJ in each panel.

1276

1277 **Figure 9.** Rate of acquisition of glutamate receptor segregation during development. Histograms  
1278 of the distribution of normalized GluRIIA and GluRIIB fluorescence at the 1<sup>st</sup> instar (day 1) (A)  
1279 and 3<sup>rd</sup> instar (day 4) (B) stages for muscle 26 imaged through the cuticle of anesthetized larvae.  
1280 For each data set, GluRIIA and GluRIIB fluorescence is presented from dimmest (0) to brightest  
1281 (1). GluRIIA shows a more skewed distribution of fluorescence at day 4, consistent with its  
1282 accumulation at high  $P_r$  AZs. (C) Representative muscle 26 NMJ image sequence showing  
1283 appearance and maturation of two new synapses (#3 and 4) that were not present in the initial  
1284 imaging session. Several preexisting synapses (#1 and 2) that developed the typical GluRIIB  
1285 donut structure later in development are also labeled. The dashed box surrounds the actual  
1286 imaged segment of the NMJ. New GluRIIA and GluRIIB clusters appear initially as small puncta  
1287 (day 2, arrows) that become brighter on day 3. By day 4 they begin to display the donut like  
1288 GluRIIB profile. At day 5, GluRIIB distribution to the periphery around a bright GluRIIA PSD

1289 representative of high  $P_r$  sites becomes prominent. The bottom panels show normalized GluRIIA  
1290 and GluRIIB fluorescent line profiles for the newly identified PSDs (#3, 4) throughout the 5 day  
1291 imaging series. **(D)** Changes in AZ number during larval maturation at muscle 26 presented as a  
1292 ratio of AZs observed during the first day of imaging (day 1).

1293

#### 1294 **Supplemental Figure Legends**

1295 **Figure 4 - supplemental figure 1.** Cac-GFP distribution at AZs analyzed by SIM microscopy.

1296 **(A)** Representative Cac-GFP and BRP puncta at AZs for two synaptic boutons imaged using  
1297 SIM microscopy. **(B)** Histogram of the distribution of mean Cac-GFP fluorescence intensity  
1298 across the AZ population. Red corresponds to the Cac-GFP containing AZ population with  
1299 fluorescence intensity 2 standard deviations above the mean. **(C)** Mean fluorescence intensity of  
1300 Cac-GFP for bright (fluorescence greater than 2 standard deviations above the average) versus  
1301 dim AZs. Student's t-test was used for statistical analysis (\*\*\*) =  $p \leq 0.001$ . Error bars represent  
1302 SEM.

1303

1304 **Figure 7 - supplemental figure 1.** Correlation between GluRIIA and Cac fluorescence  
1305 intensities during early larval development. **(A)** Representative Cac-GFP (green) and GluRIIA-  
1306 RFP (red) synaptic puncta at a muscle 26 NMJ imaged through the cuticle of an anesthetized  
1307 animal during early larval development. Arrows denote AZs with bright Cac-GFP opposed to  
1308 PSDs with high levels of GluRIIA. **(B)** Correlation between GluRIIA-RFP and Cac-GFP at  
1309 individual AZs.

1310

1311 **Figure 8 - supplemental figure 1.** Consecutive imaging of NMJ growth at muscle 26 over a 5-  
1312 day period imaged through the cuticle of an anesthetized larva during development. The entire  
1313 NMJ is shown on the left panel. A smaller area (dashed box) is magnified and shown in the right  
1314 panels. The merged image of GluRIIA and GluRIIB is shown in the middle, with individual  
1315 GluRIIB and GluRIIA channels on the right. Several PSDs are numbered for tracking across  
1316 imaging sessions. New PSDs appearing on day 2 (arrow) form the GluRIIB donut by day 4. On  
1317 day 5, a larger number of PSDs display the characteristic GluRIIB peripheral segregation around  
1318 a GluRIIA core, including those identified on the 1<sup>st</sup> day of imaging (numbered).

1319

1320 **Figure 8 - supplemental figure 2.** GluRIIA fluorescence intensity increases over time in a rate  
1321 proportional to PSD birthdate. Representative serial images of muscle 26 NMJs visualized  
1322 through the cuticle of two anesthetized larvae during development (**A**, **B**). The dashed box  
1323 surrounds the actual imaged segment of the NMJ in each panel. The brightest GluRIIA puncta  
1324 are numbered and followed through the imaging period. The brightest GluRIIA puncta observed  
1325 on day 1 were among the brightest puncta on later days. Rarely, formation of new PSDs that  
1326 showed a faster rate of GluRIIA accumulation were observed (arrow). (**C**) By day 5 of larval  
1327 development, many PSDs show the donut-like GluRIIB distribution, though the number of  
1328 smaller GluRIIB puncta also increase due to new AZ addition.

1329

1330 **Figure 8 - supplemental figure 3.** Synapse development along early GluRIIA positive NMJ  
1331 extensions. (**A**) The two representative muscle 26 NMJs shown in Figure 8A were followed

1332 during development. The top panels display the NMJ structure visualized during live imaging in  
1333 early 1<sup>st</sup> instar larvae expressing GluRIIA-RFP and GluRIIB-GFP. The GluRIIA-RFP positive  
1334 extensions from the main arbor that were devoid of detectable PSDs or GluRIIB at this stage of  
1335 development (large arrow) later formed normal boutons with many PSDs by day 2 and 3.  
1336 Smaller arrows denote the same PSD at each day for orientation.

1337

### 1338 **Movie 1**

1339 Representative movie showing evoked and spontaneous GCaMP6s events (green) in larvae  
1340 expressing GluRIIA-RFP (red) that were stimulated at 0.3 Hz.

1341

### 1342 **Movie 2**

1343 Representative movie showing spontaneous GCaMP6s events in *sytI* mutants expressing  
1344 GluRIIA-RFP (red), followed by GCaMP6s events observed during 5 Hz stimulation.

1345

### 1346 **Movie 3**

1347 Representative movie showing evoked and spontaneous jRGECO events (red) in larvae  
1348 expressing Cac-GFP (green).

1349

1350

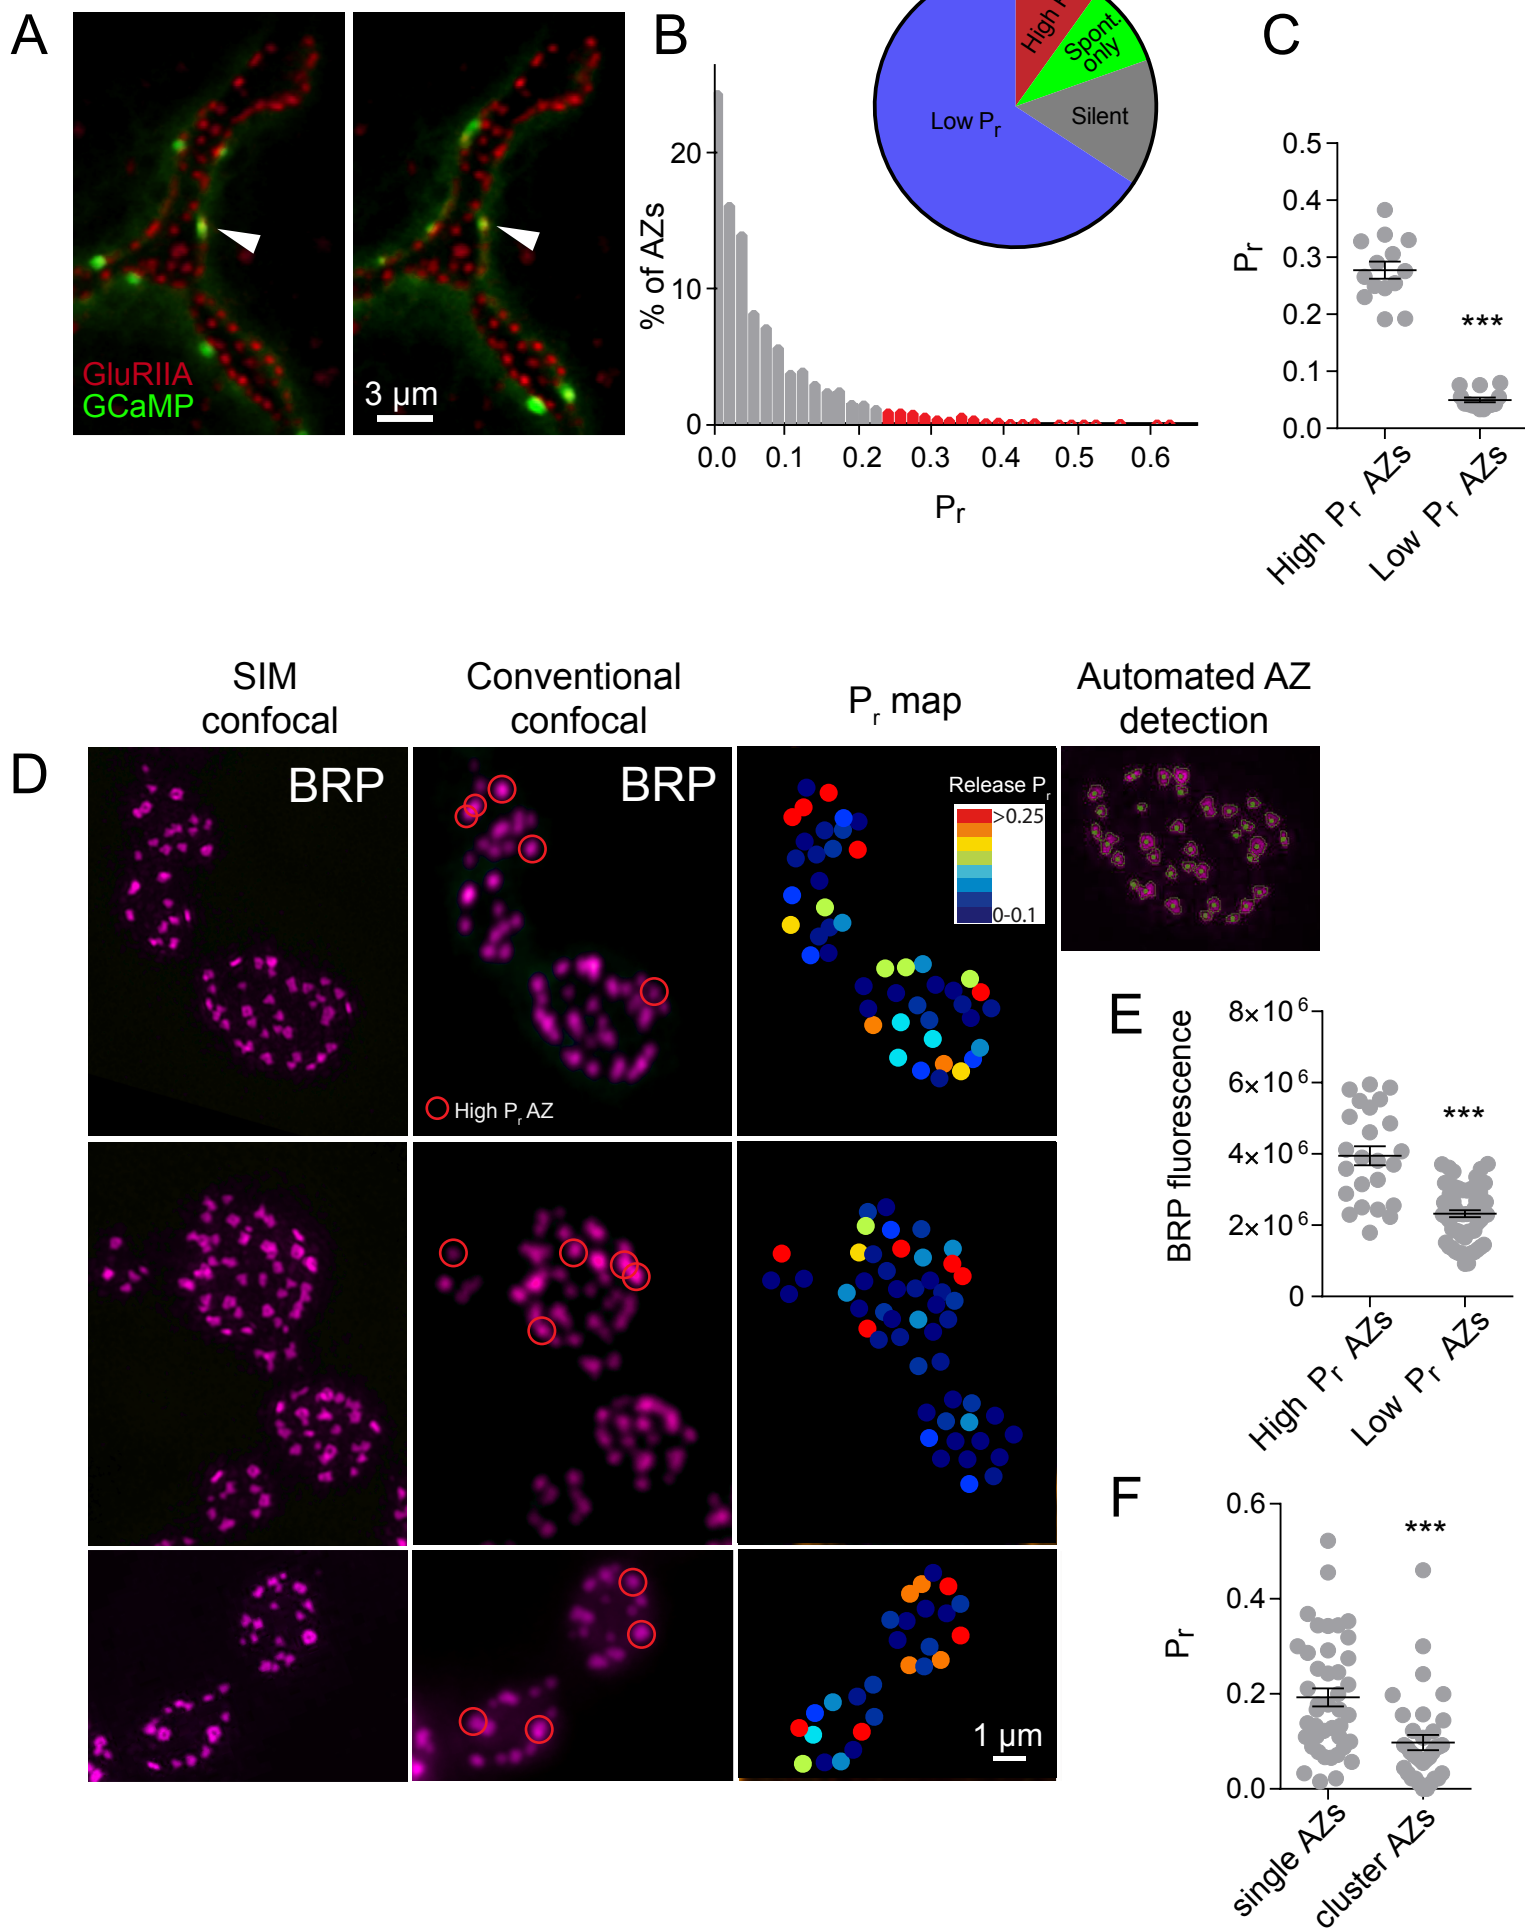

Release map 1

3 min 0.3 Hz

Release map 2

5 min Rest

3 min 0.3 Hz

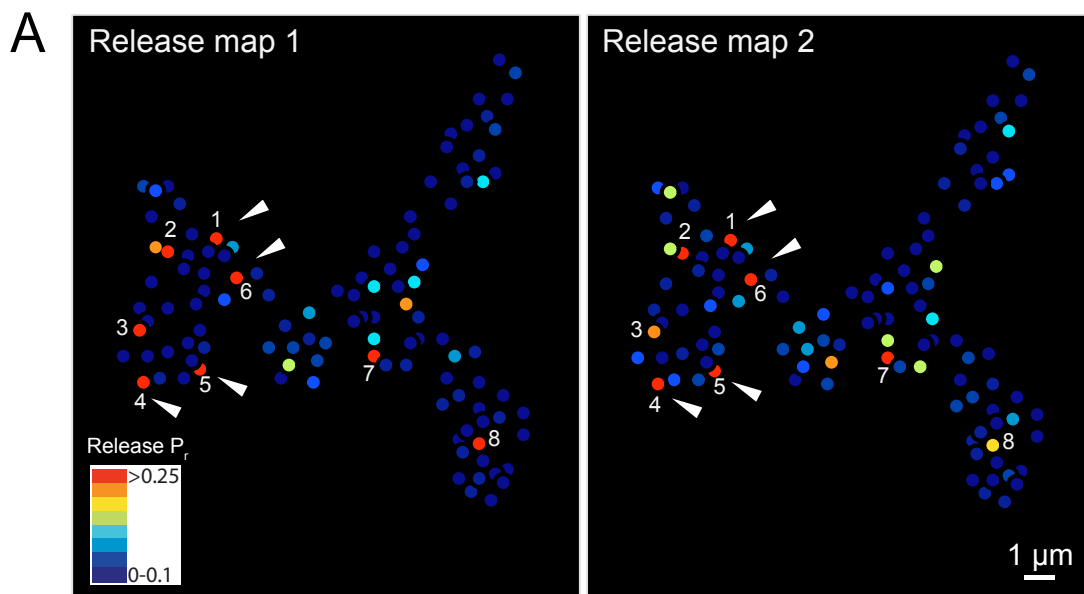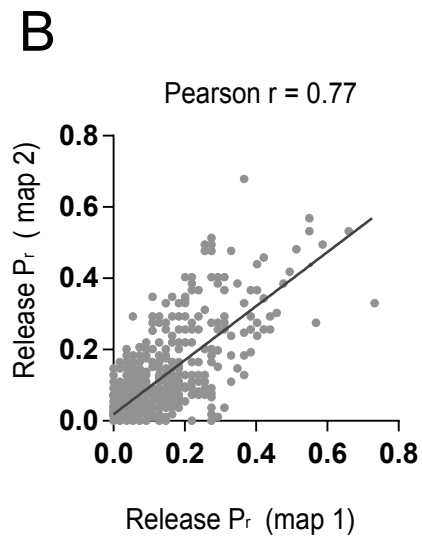

Release map 1

3 min 0.3 Hz

Release map 2

5 min 5 Hz

3 min 0.3 Hz

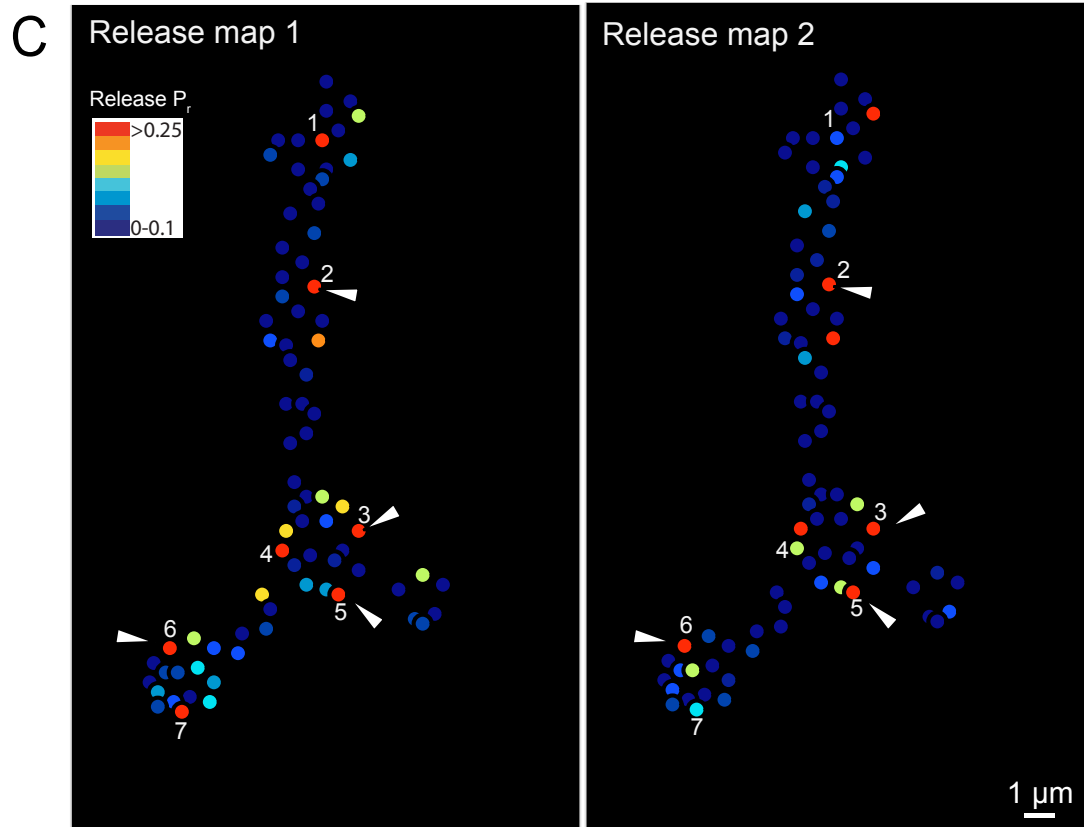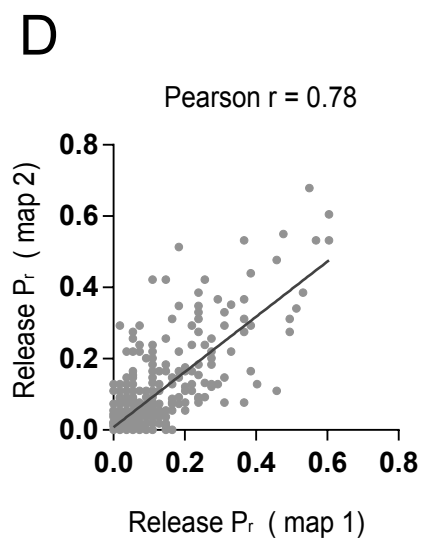

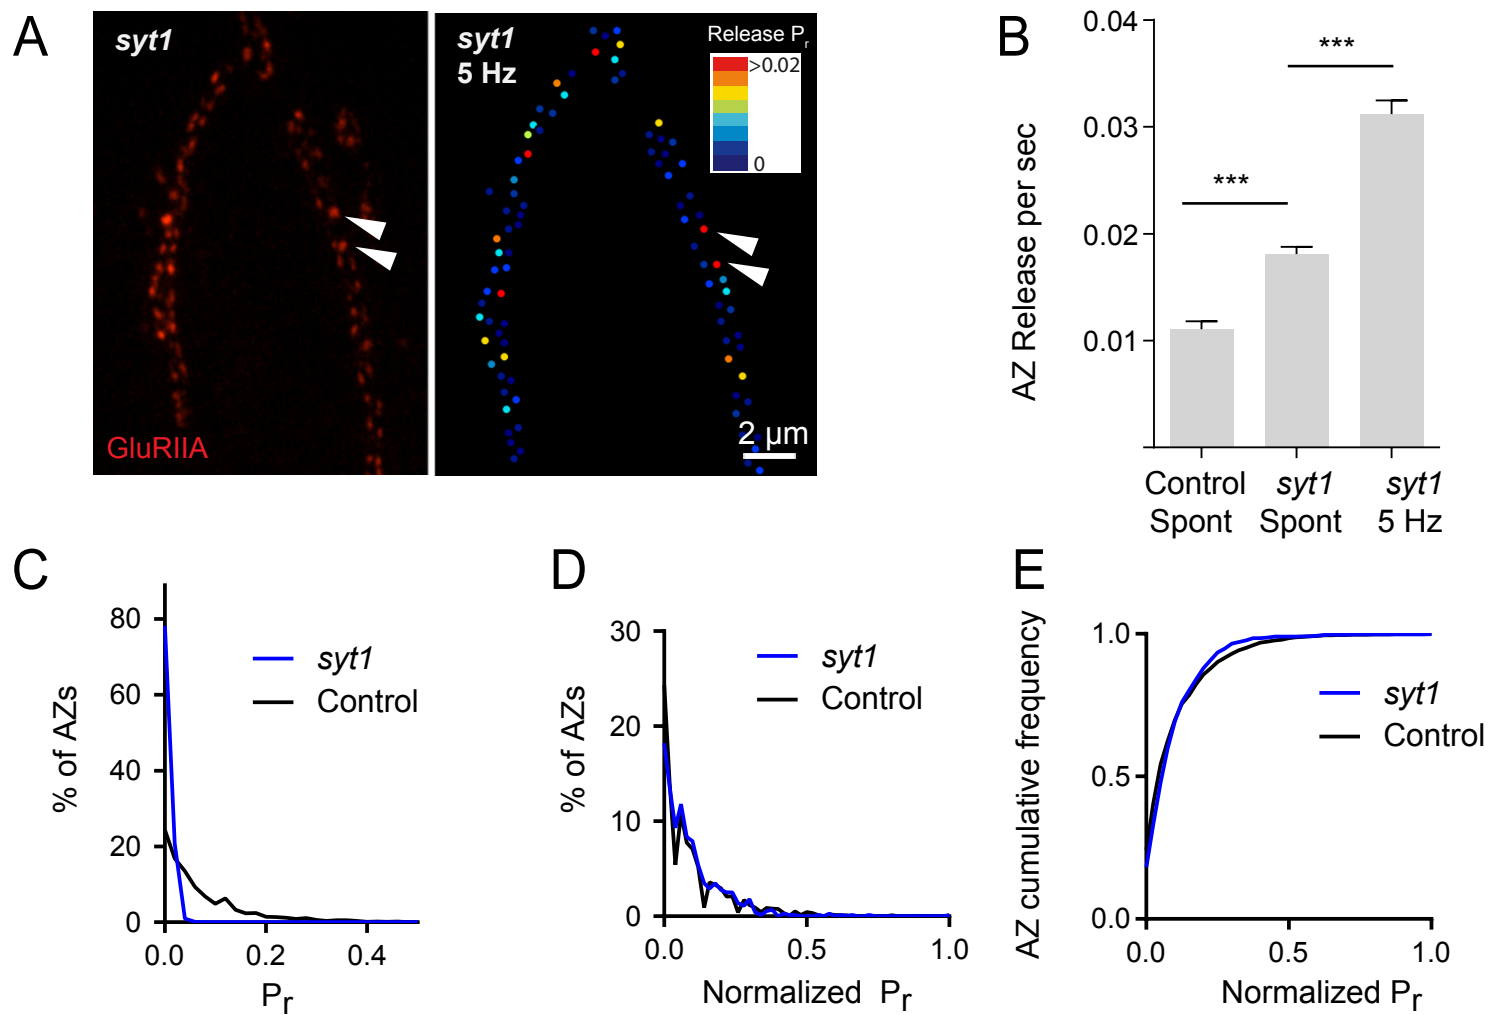



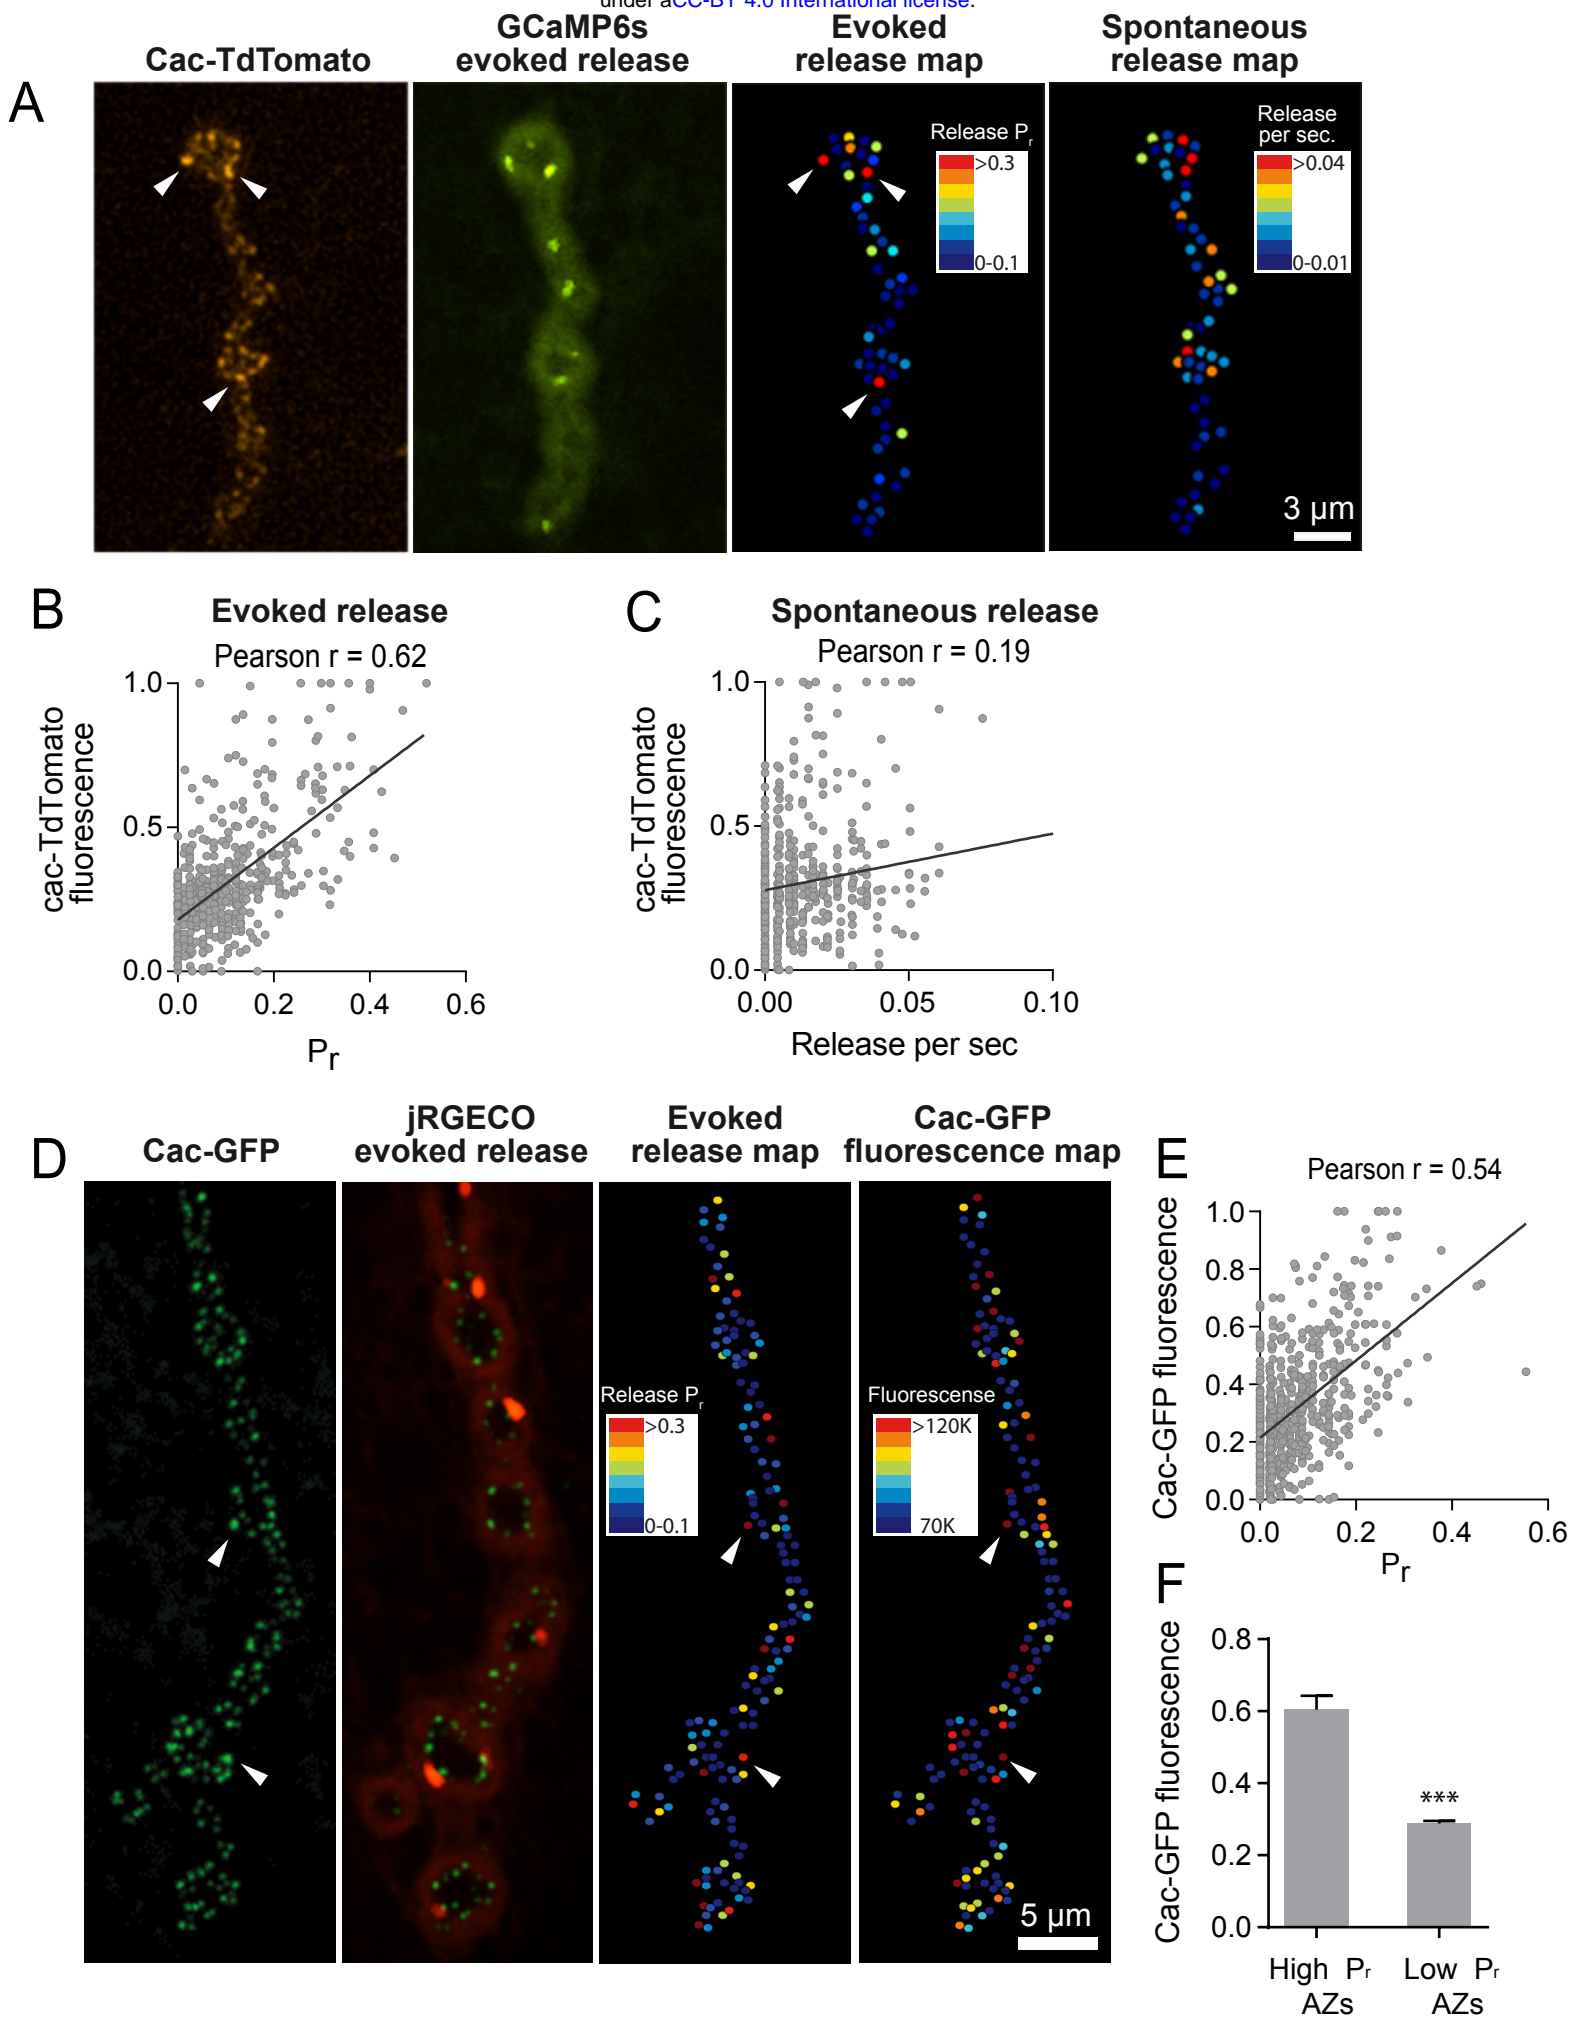



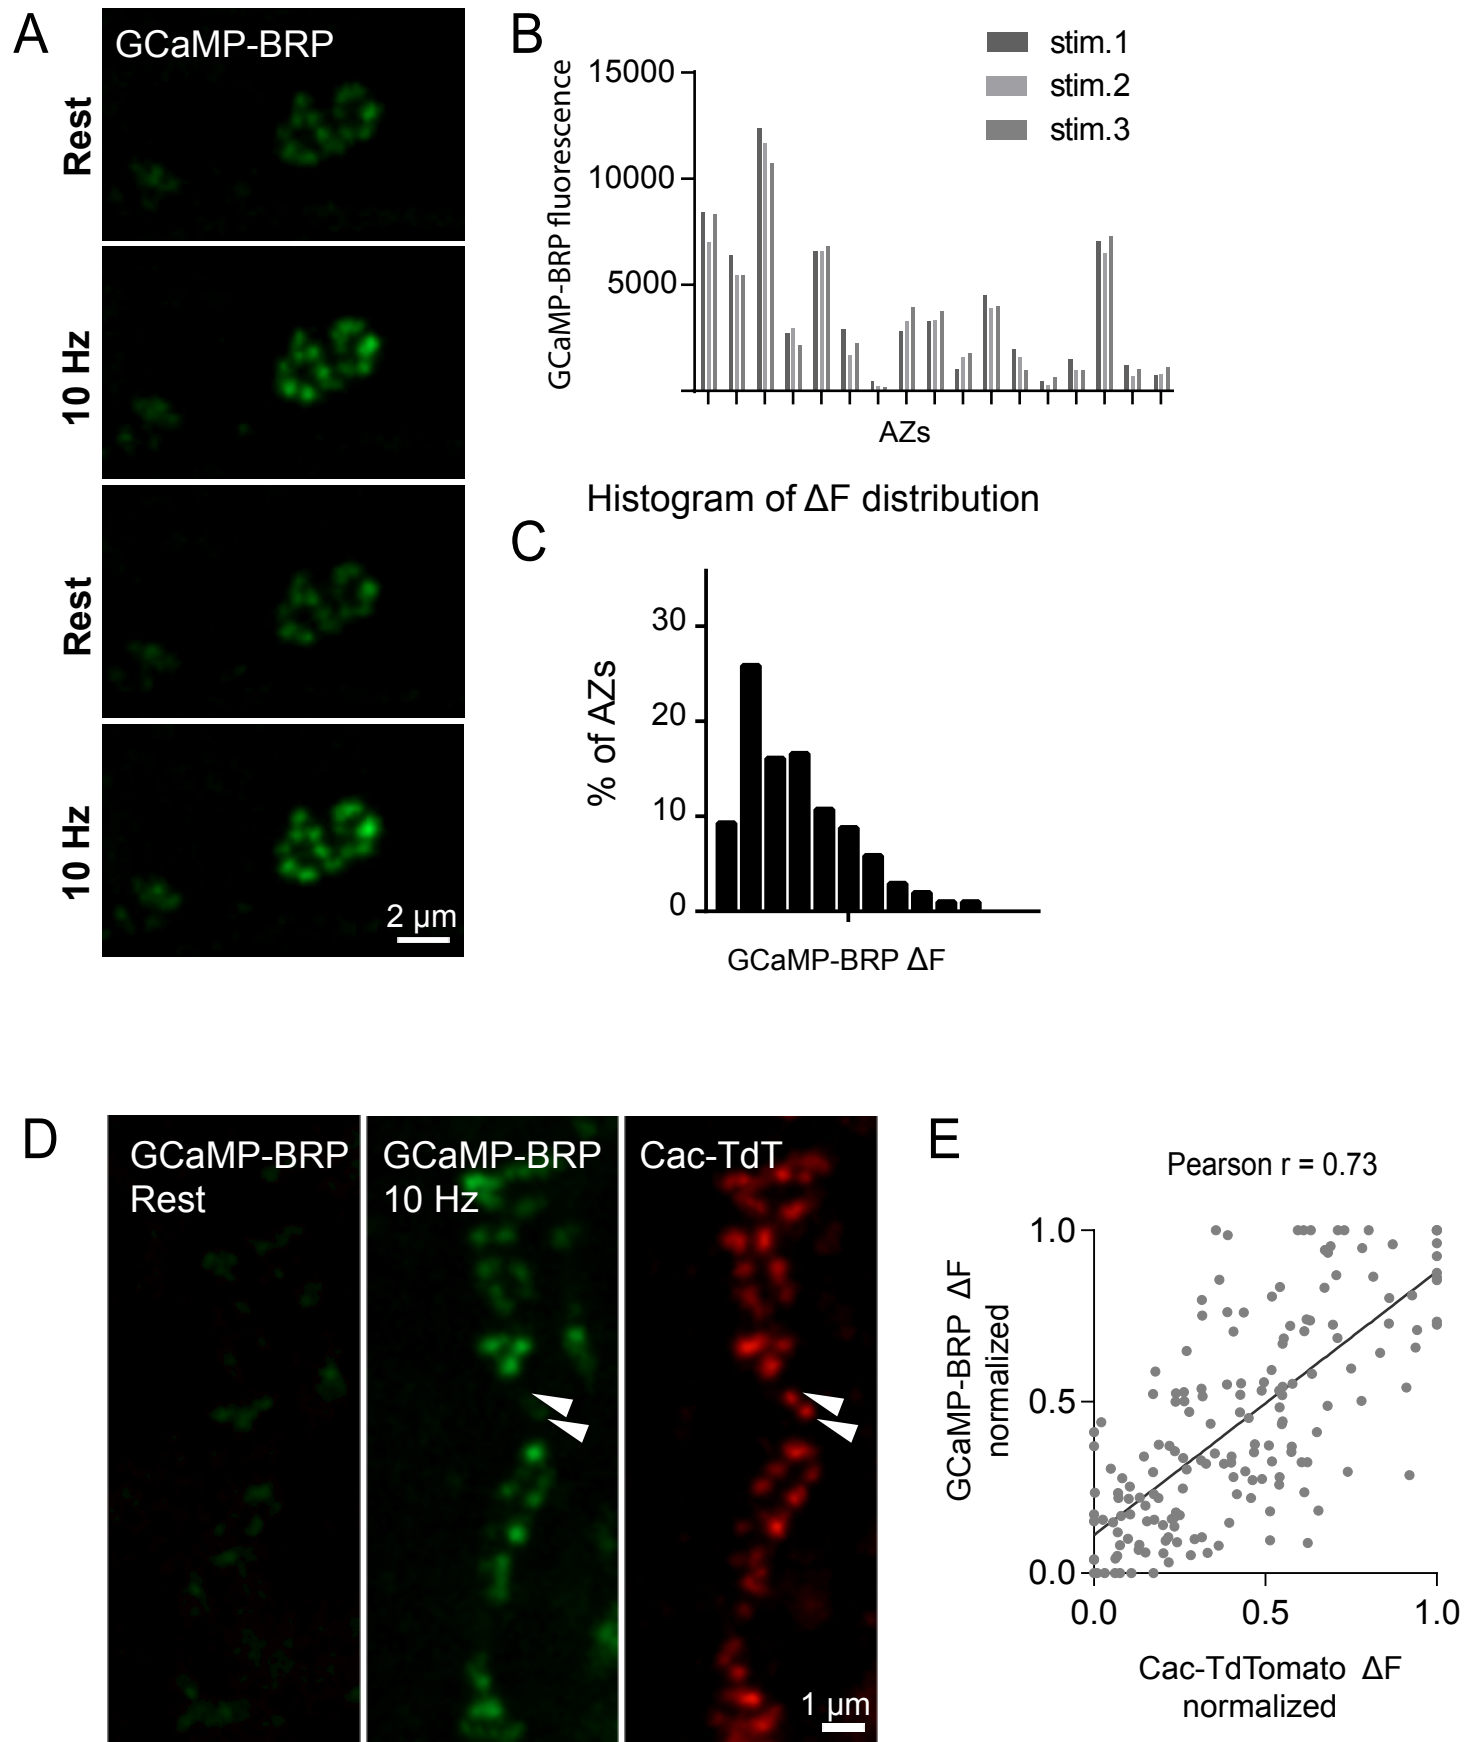

Figure 6

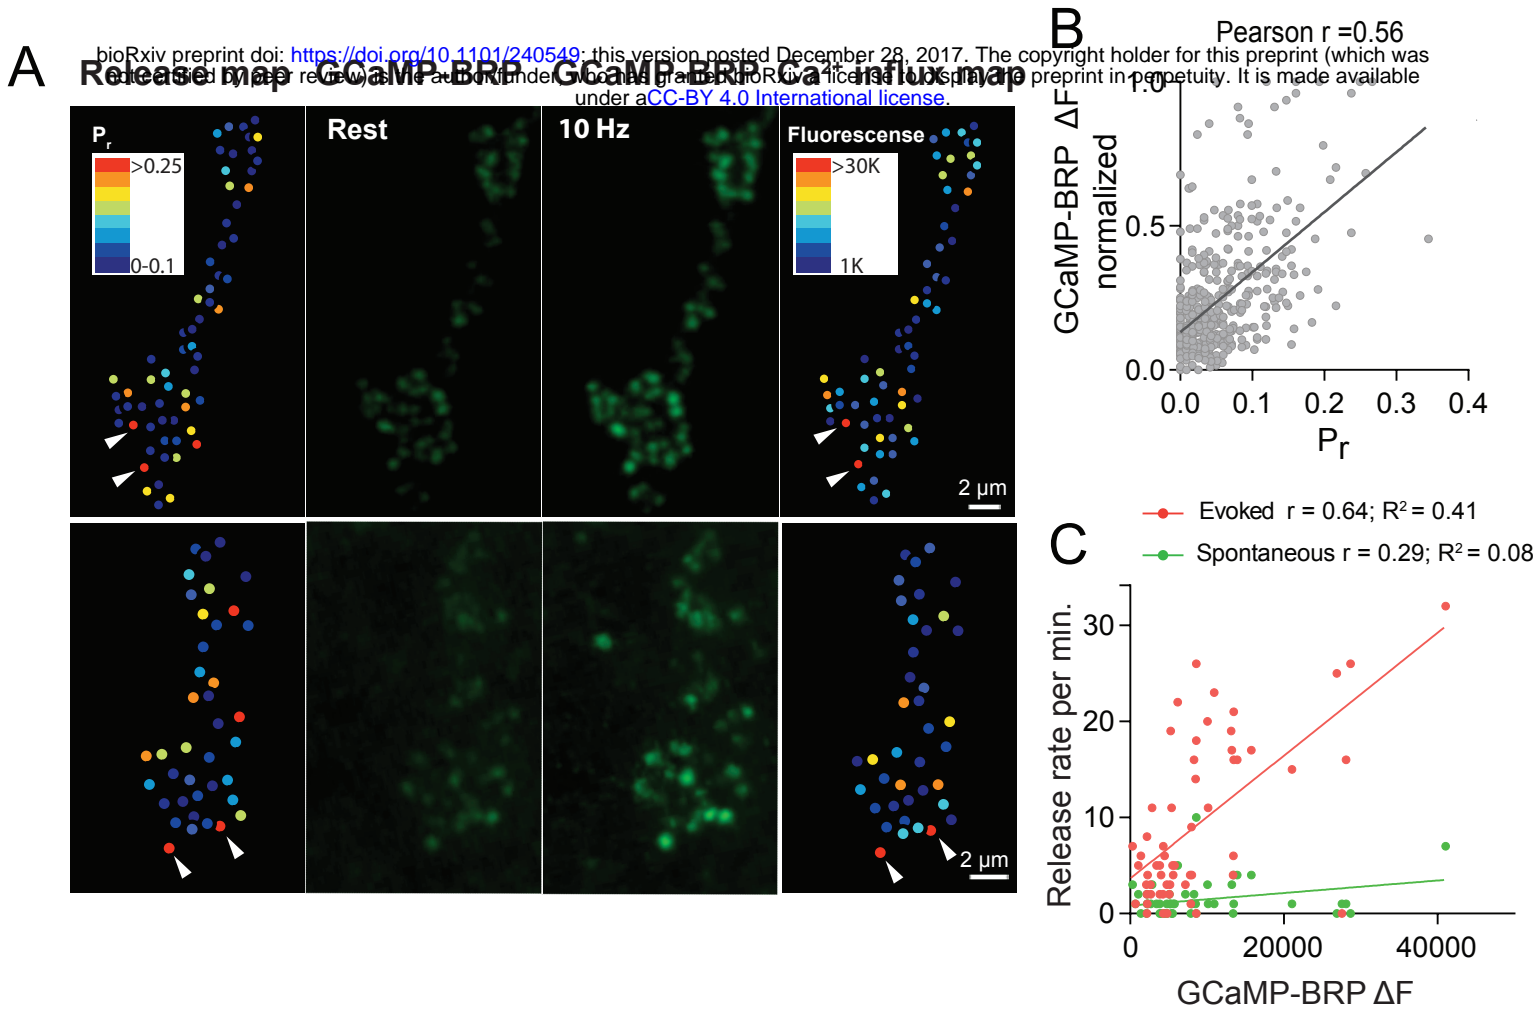

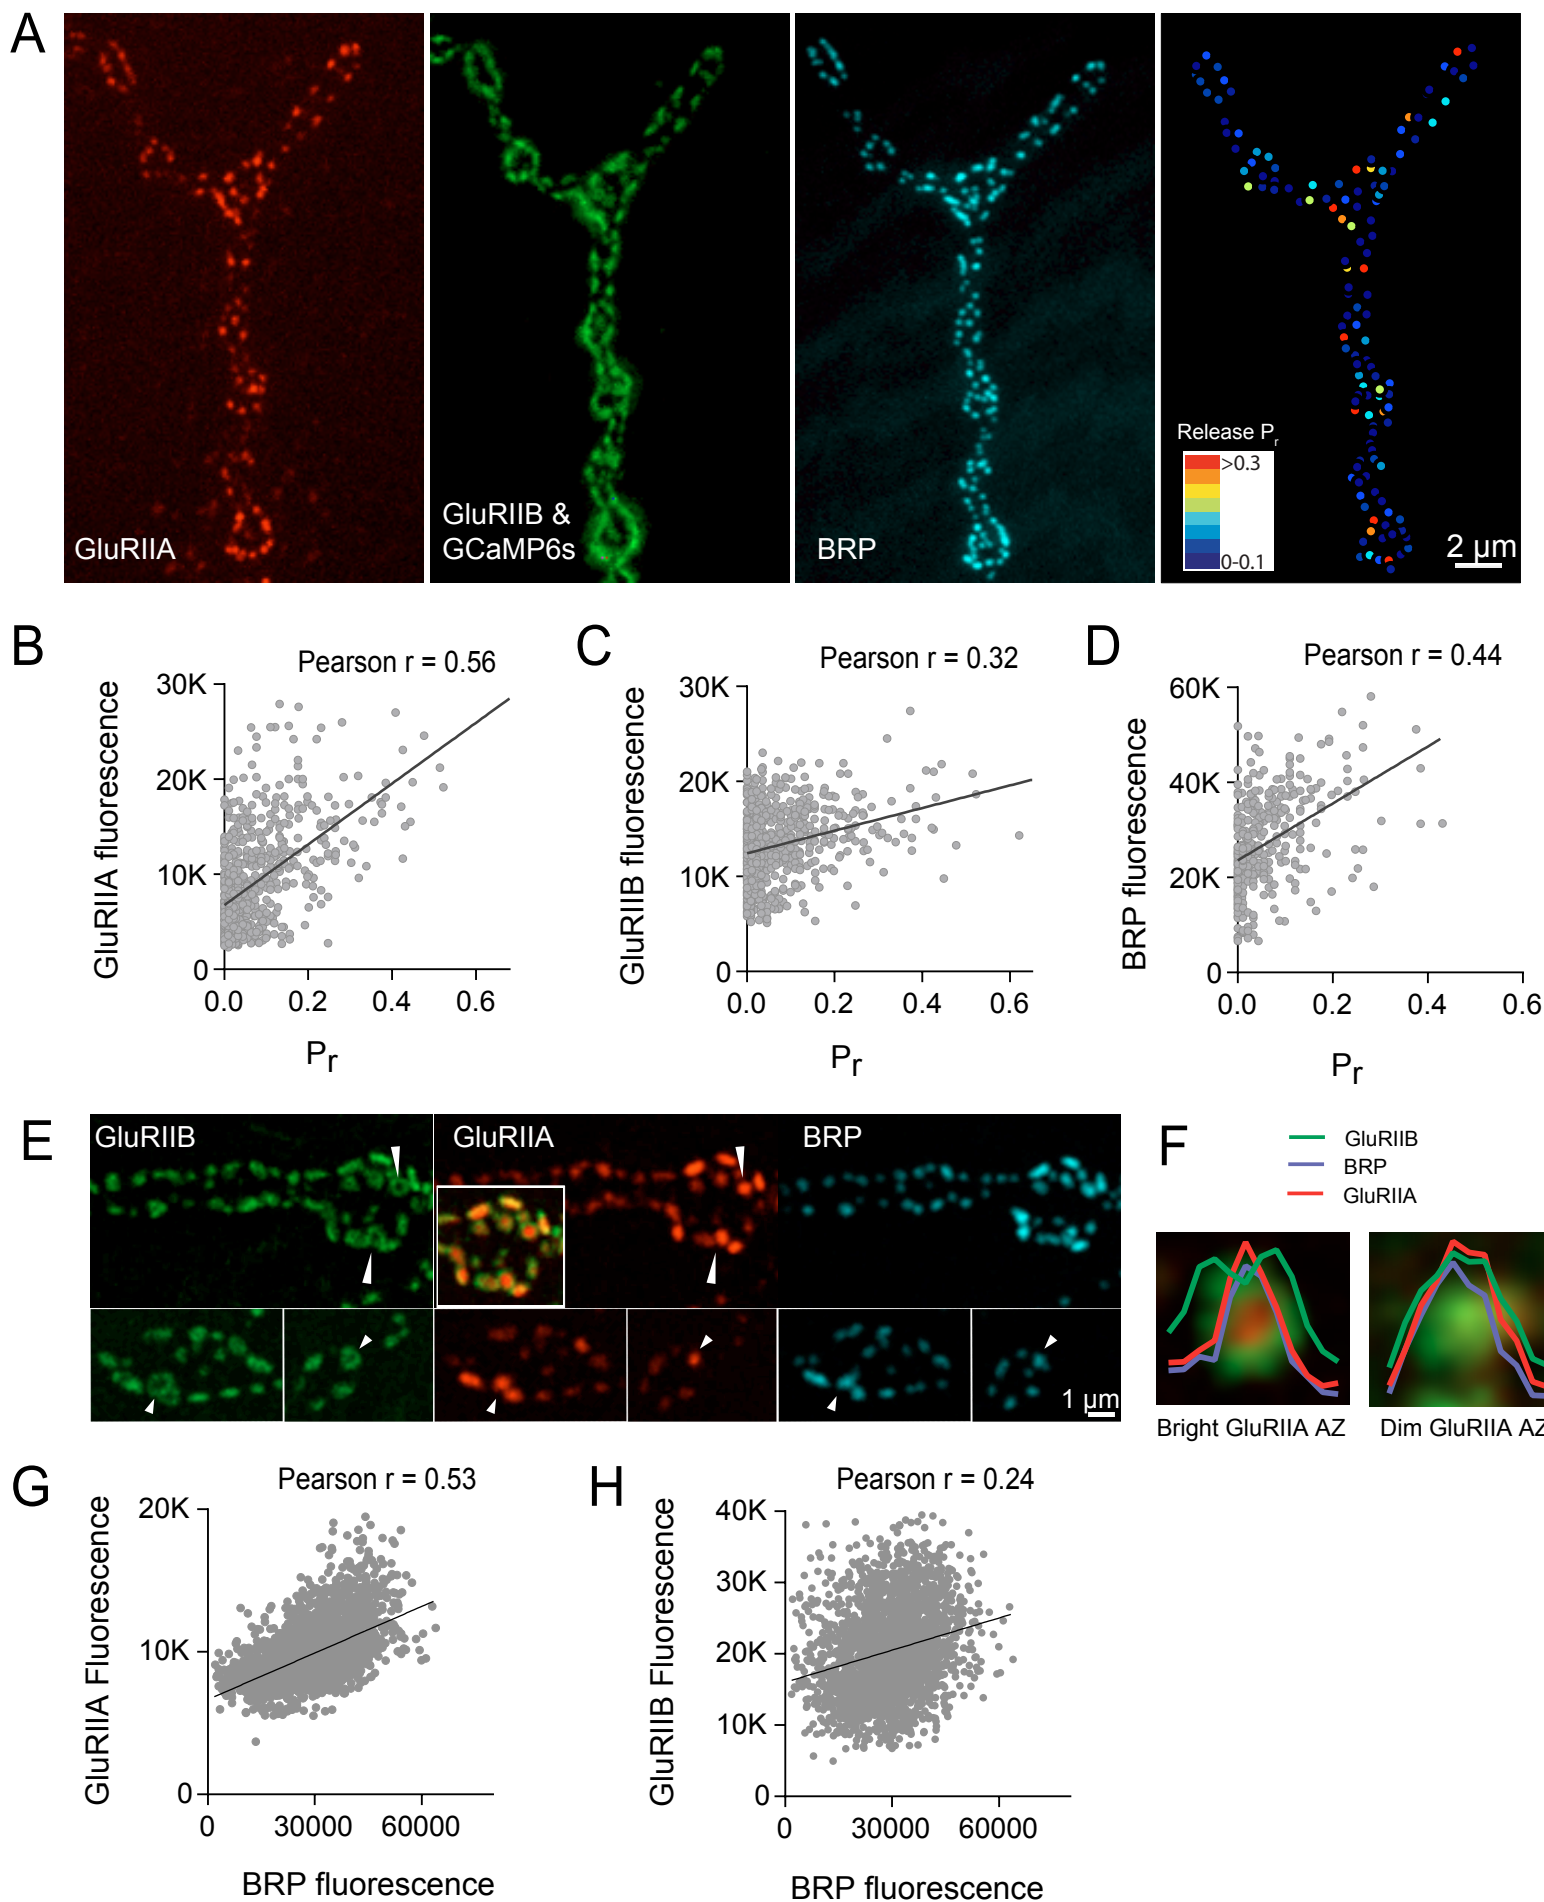

Figure 8

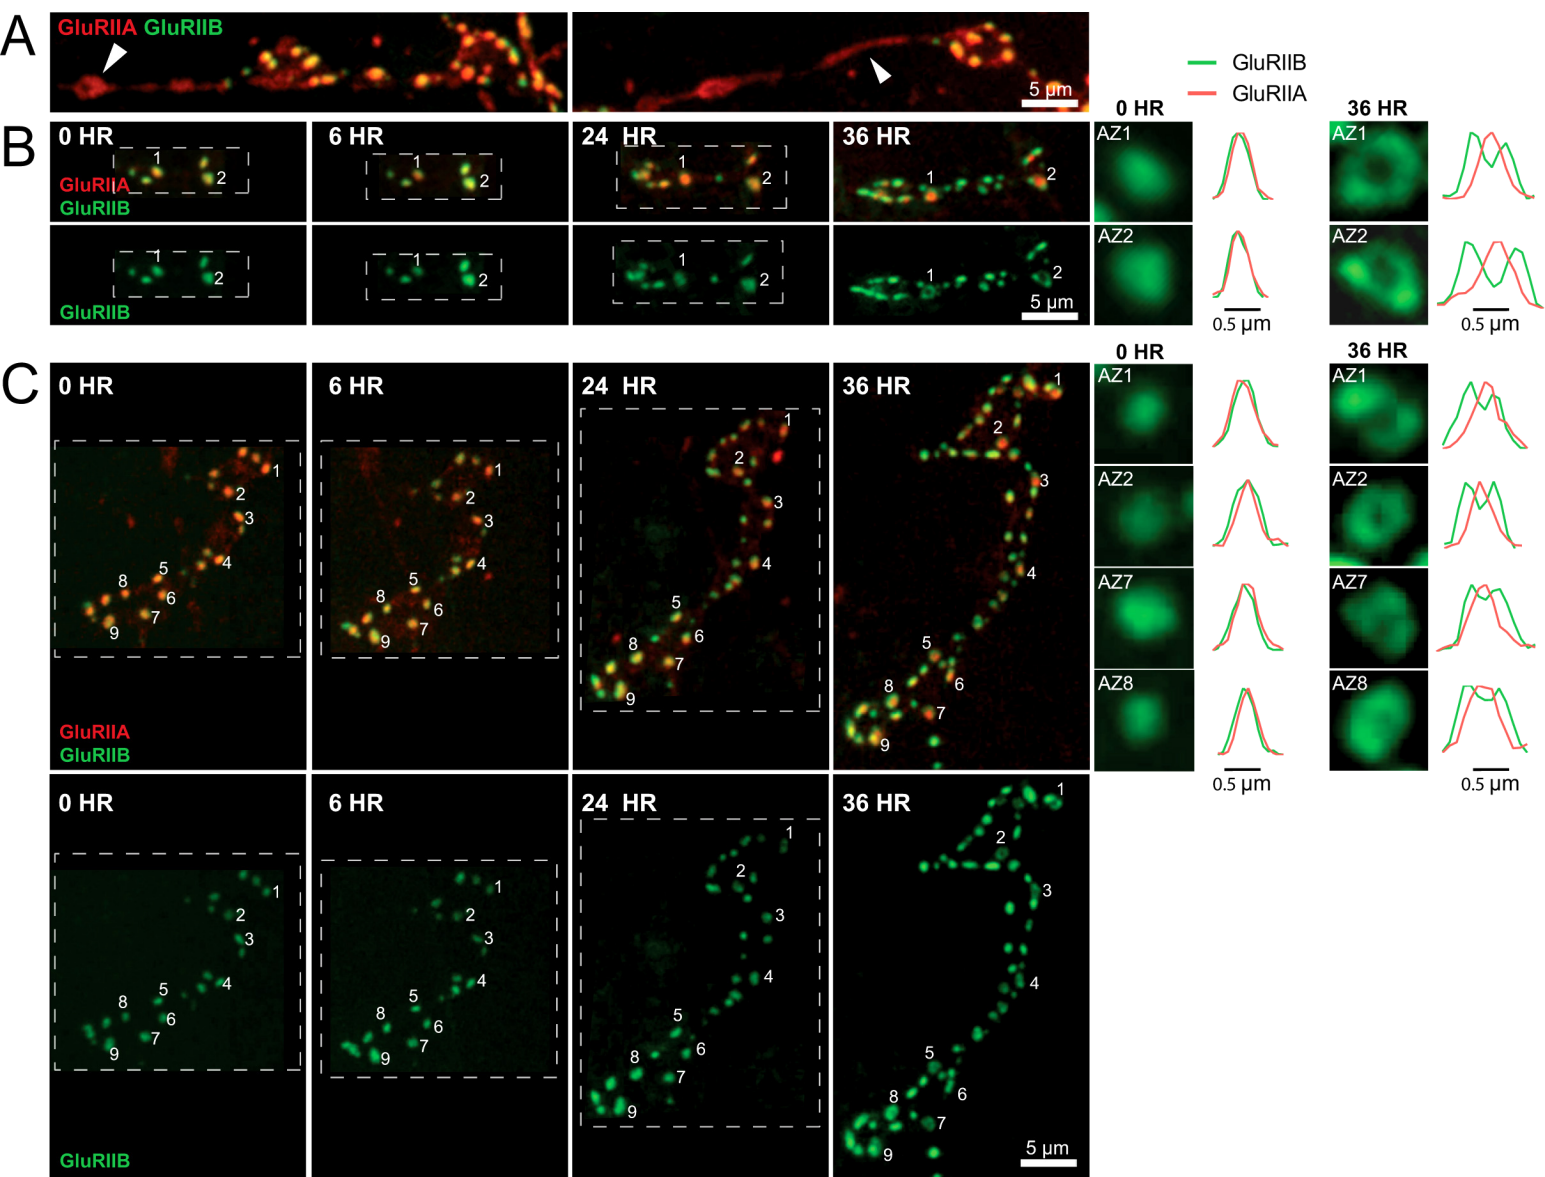

A

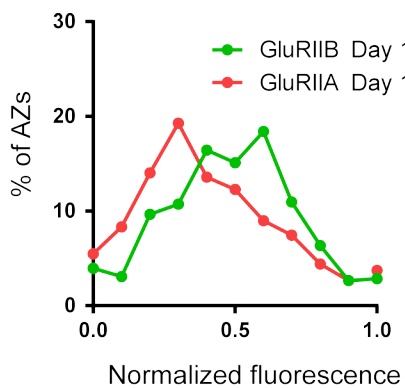

B

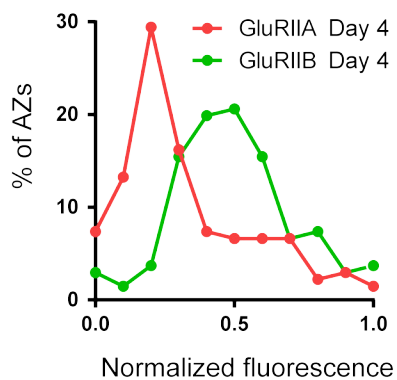

C

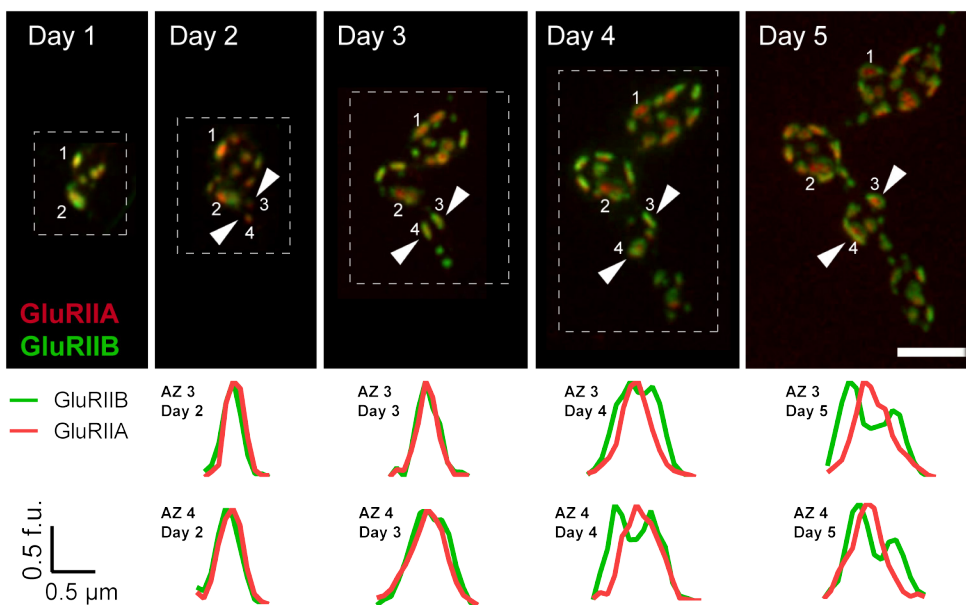

D

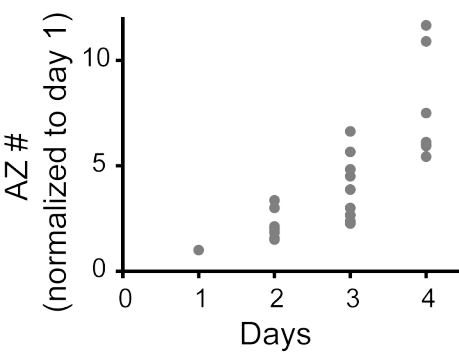

# Figure 4- figure supplement 1

bioRxiv preprint doi: <https://doi.org/10.1101/240549>; this version posted December 28, 2017. The copyright holder for this preprint (which was not certified by peer review) is the author/funder, who has granted bioRxiv a license to display the preprint in perpetuity. It is made available under aCC-BY 4.0 International license.

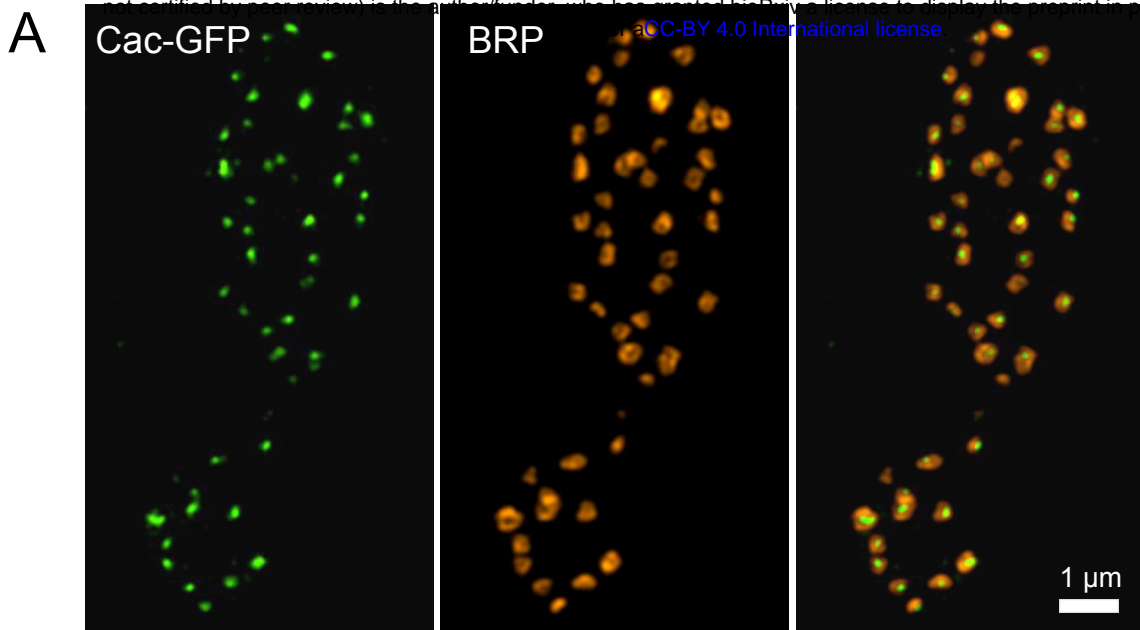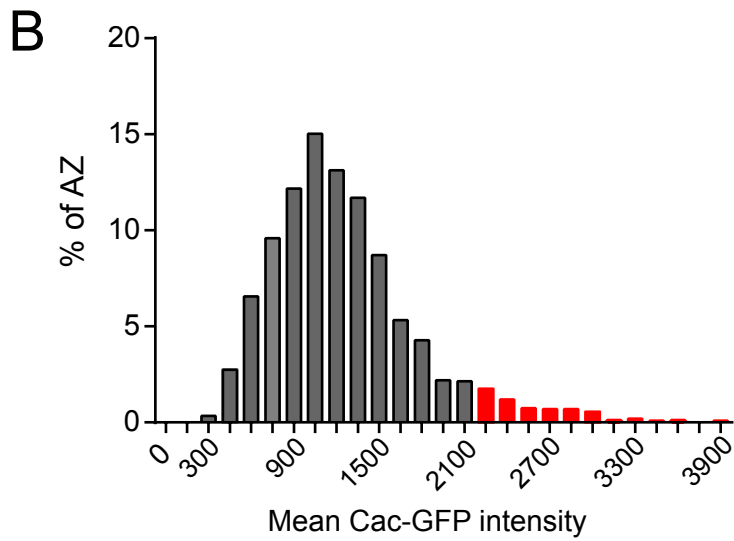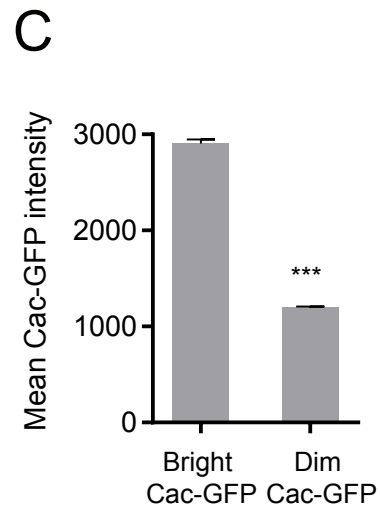

Figure 7 - figure supplement 1

bioRxiv preprint doi: <https://doi.org/10.1101/240549>; this version posted December 28, 2017. The copyright holder for this preprint (which was not certified by peer review) is the author/funder, who has granted bioRxiv a license to display the preprint in perpetuity. It is made available under aCC-BY 4.0 International license.

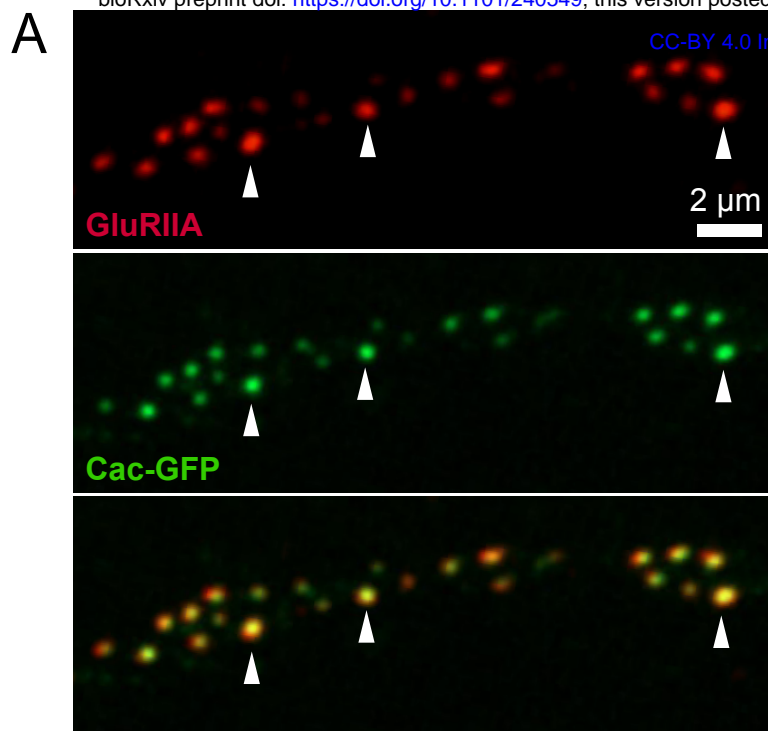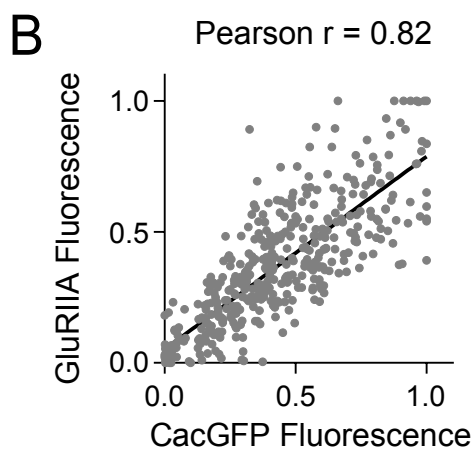



Figure 8 - figure supplement 1

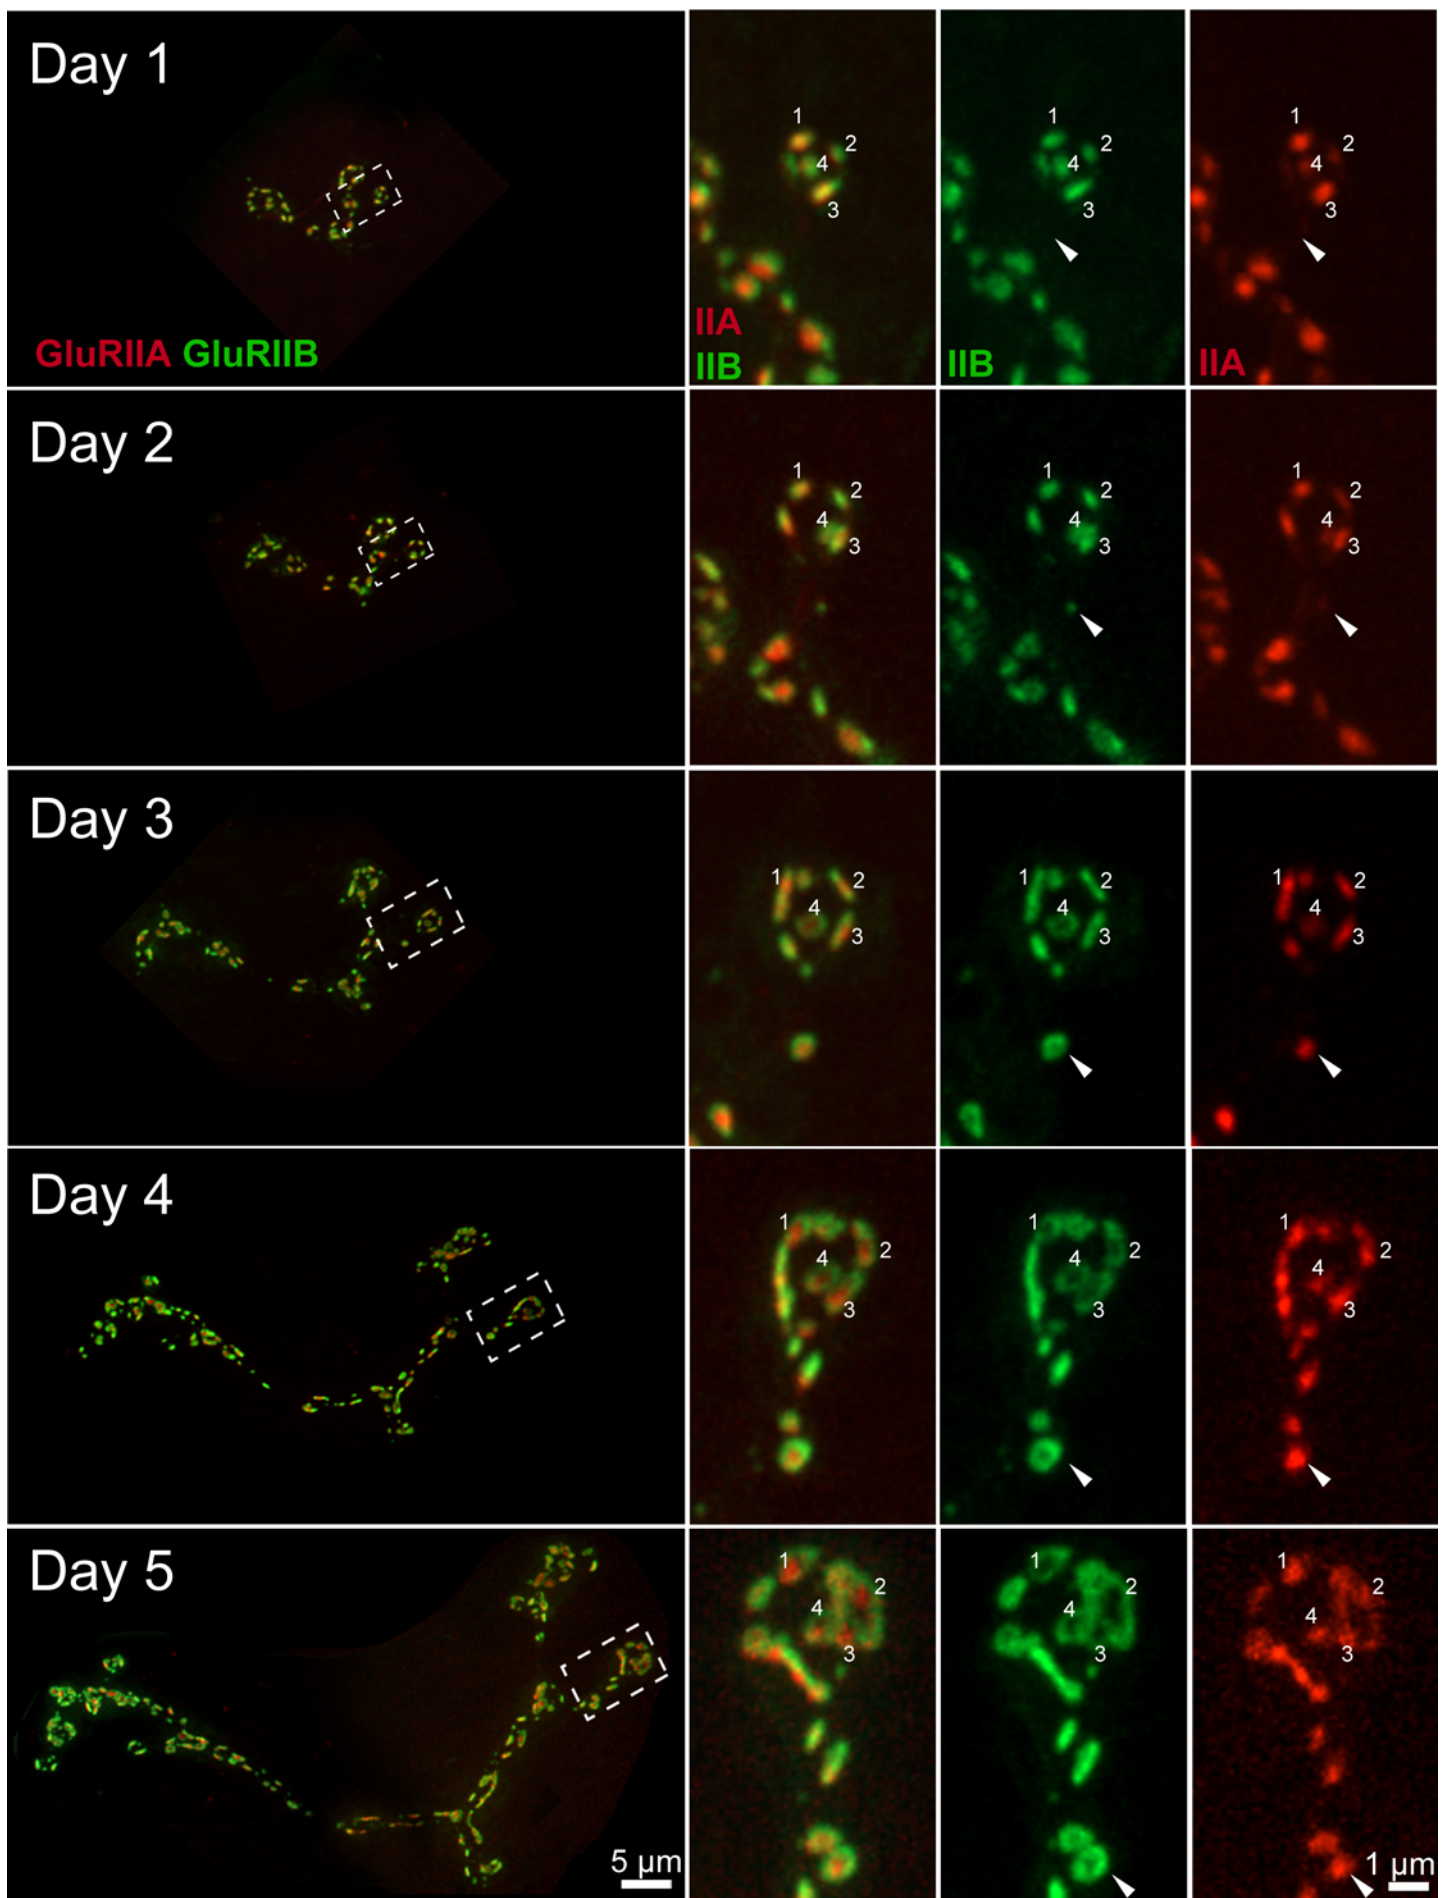



Figure 8 - figure supplement 2

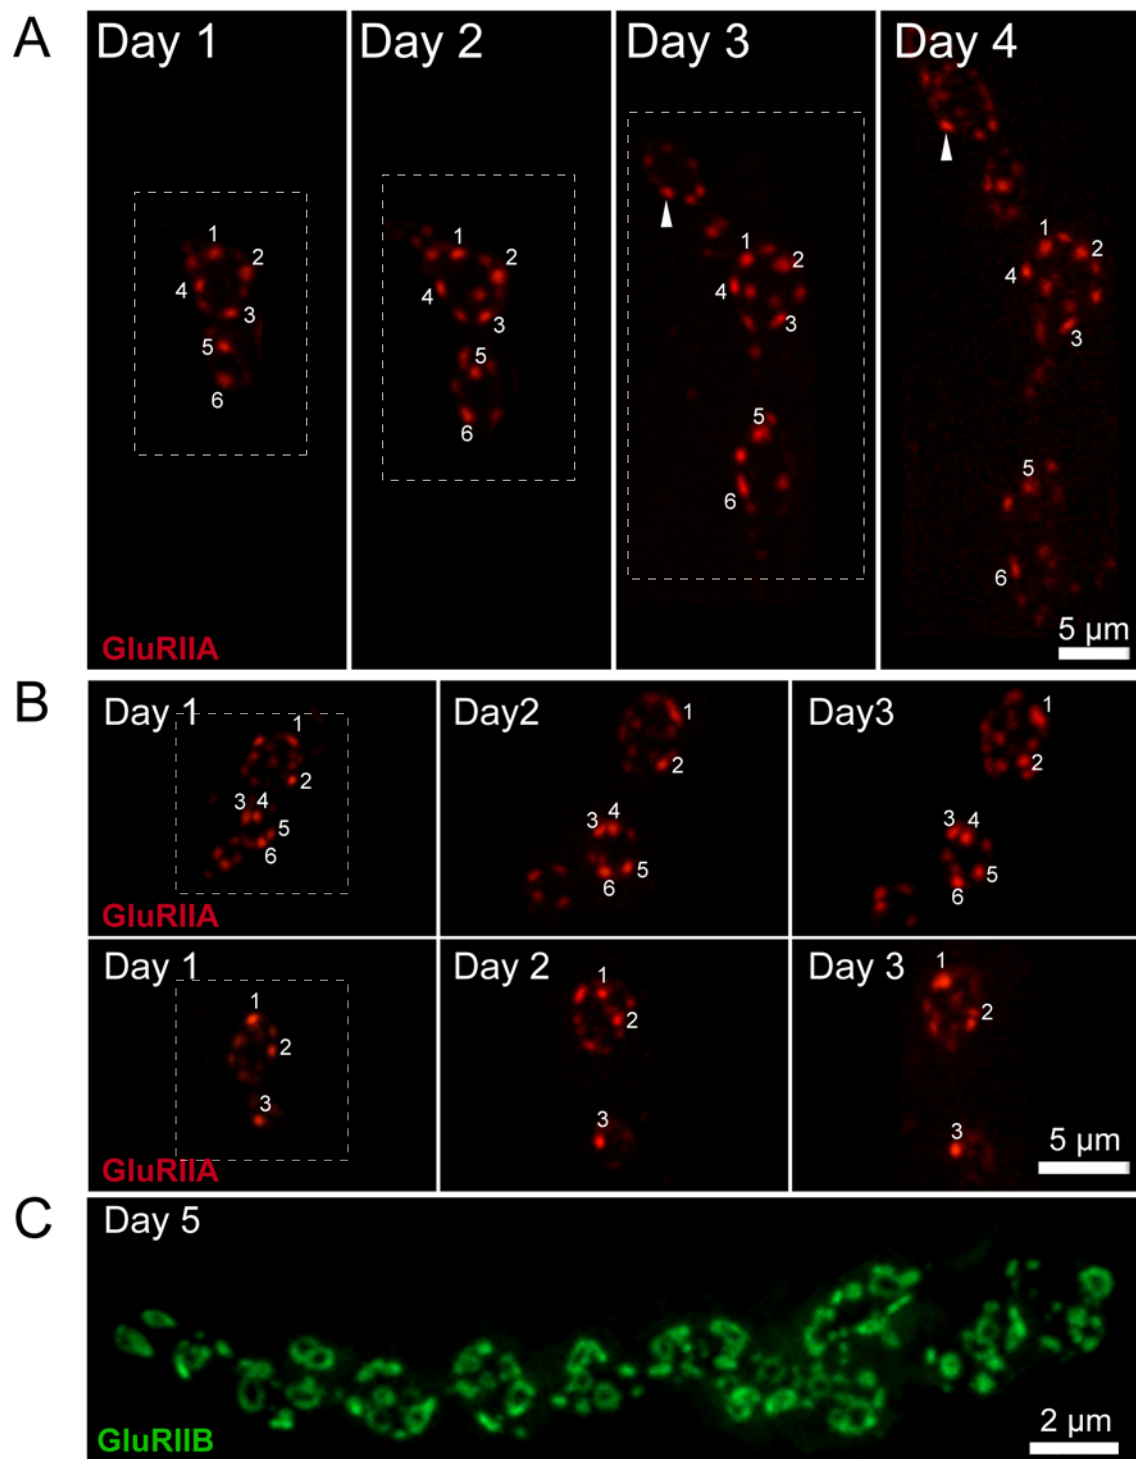

Figure 8 - figure supplement 3

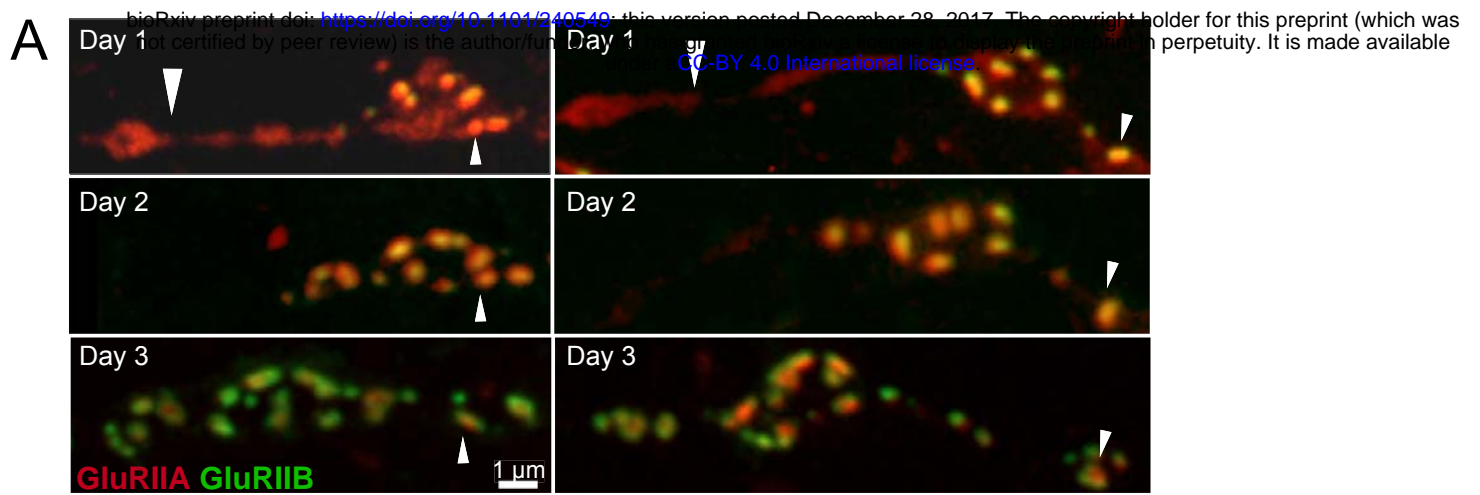

Source: http://biorxiv.org/content/10.1101/240549v1.full.pdf
